# Supplementary material for: Identification of 22 N-glycosites on Spike Glycoprotein of SARS-CoV-2 and Accessible Surface Glycopeptide Motifs: Implications on Vaccination and Antibody Therapeutics
Source: Preprints.org preprint supplement (doi:10.20944/preprints202002.0381.v2), 2020-04-13

N17

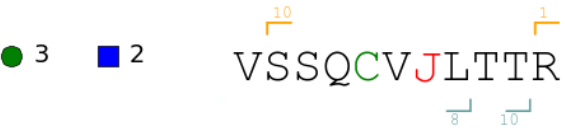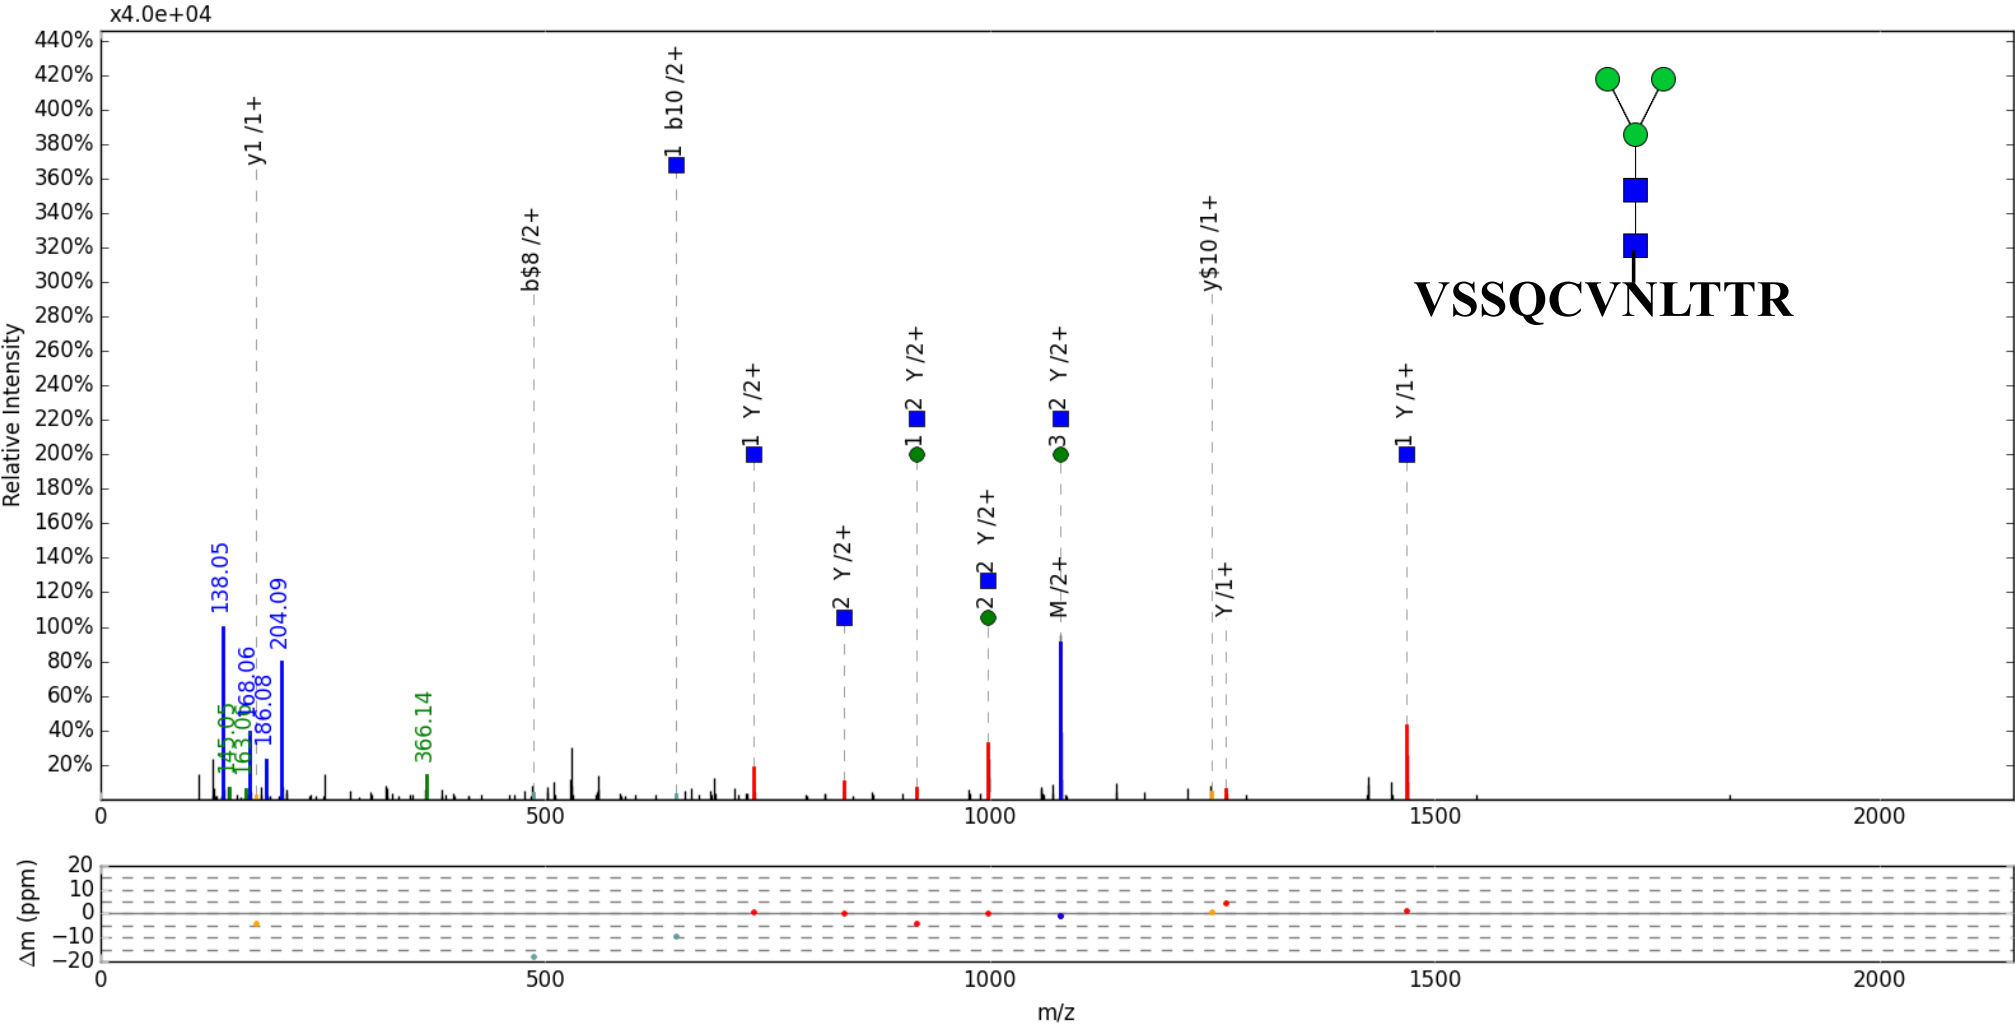

N17

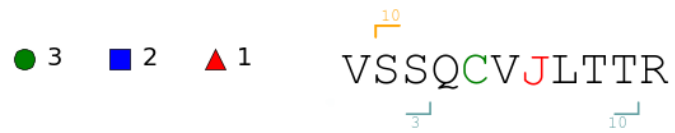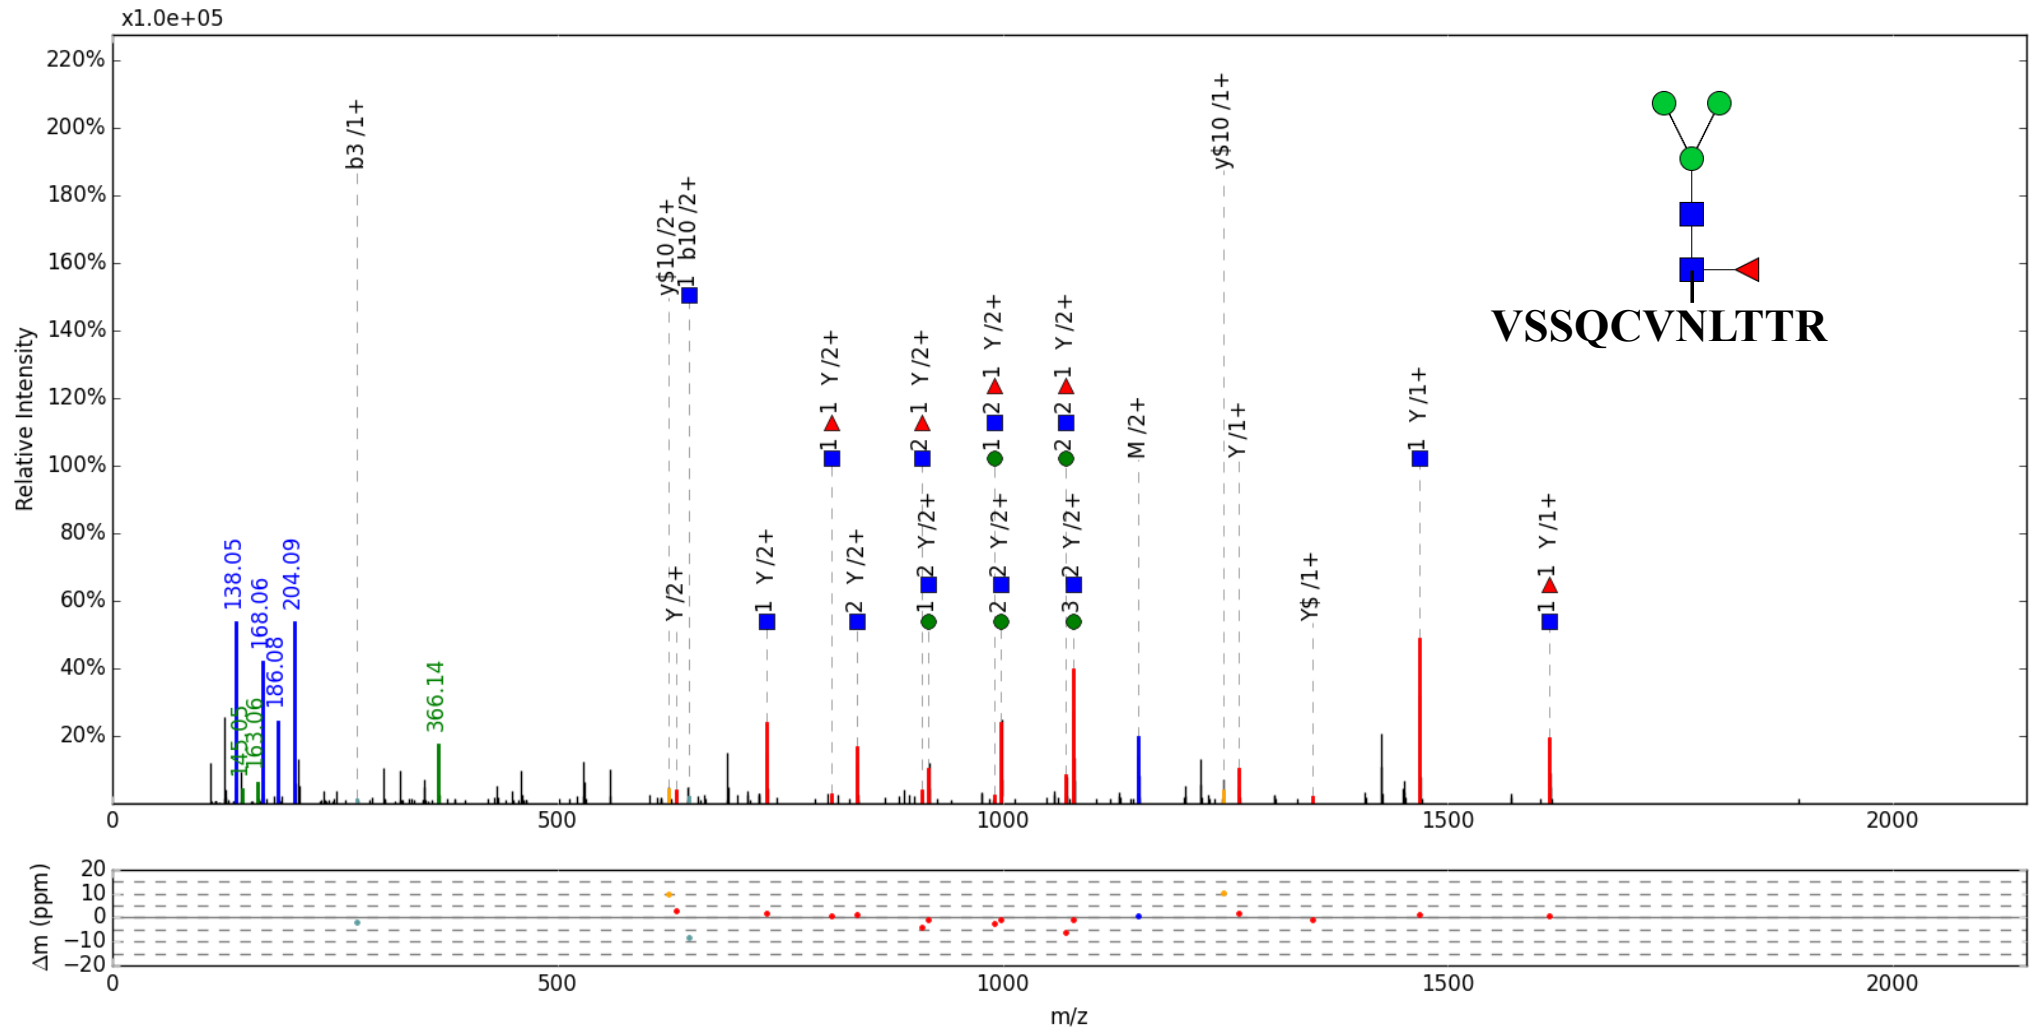

N61

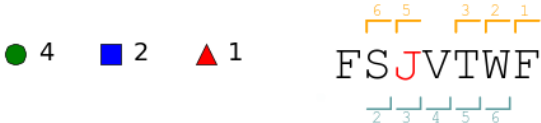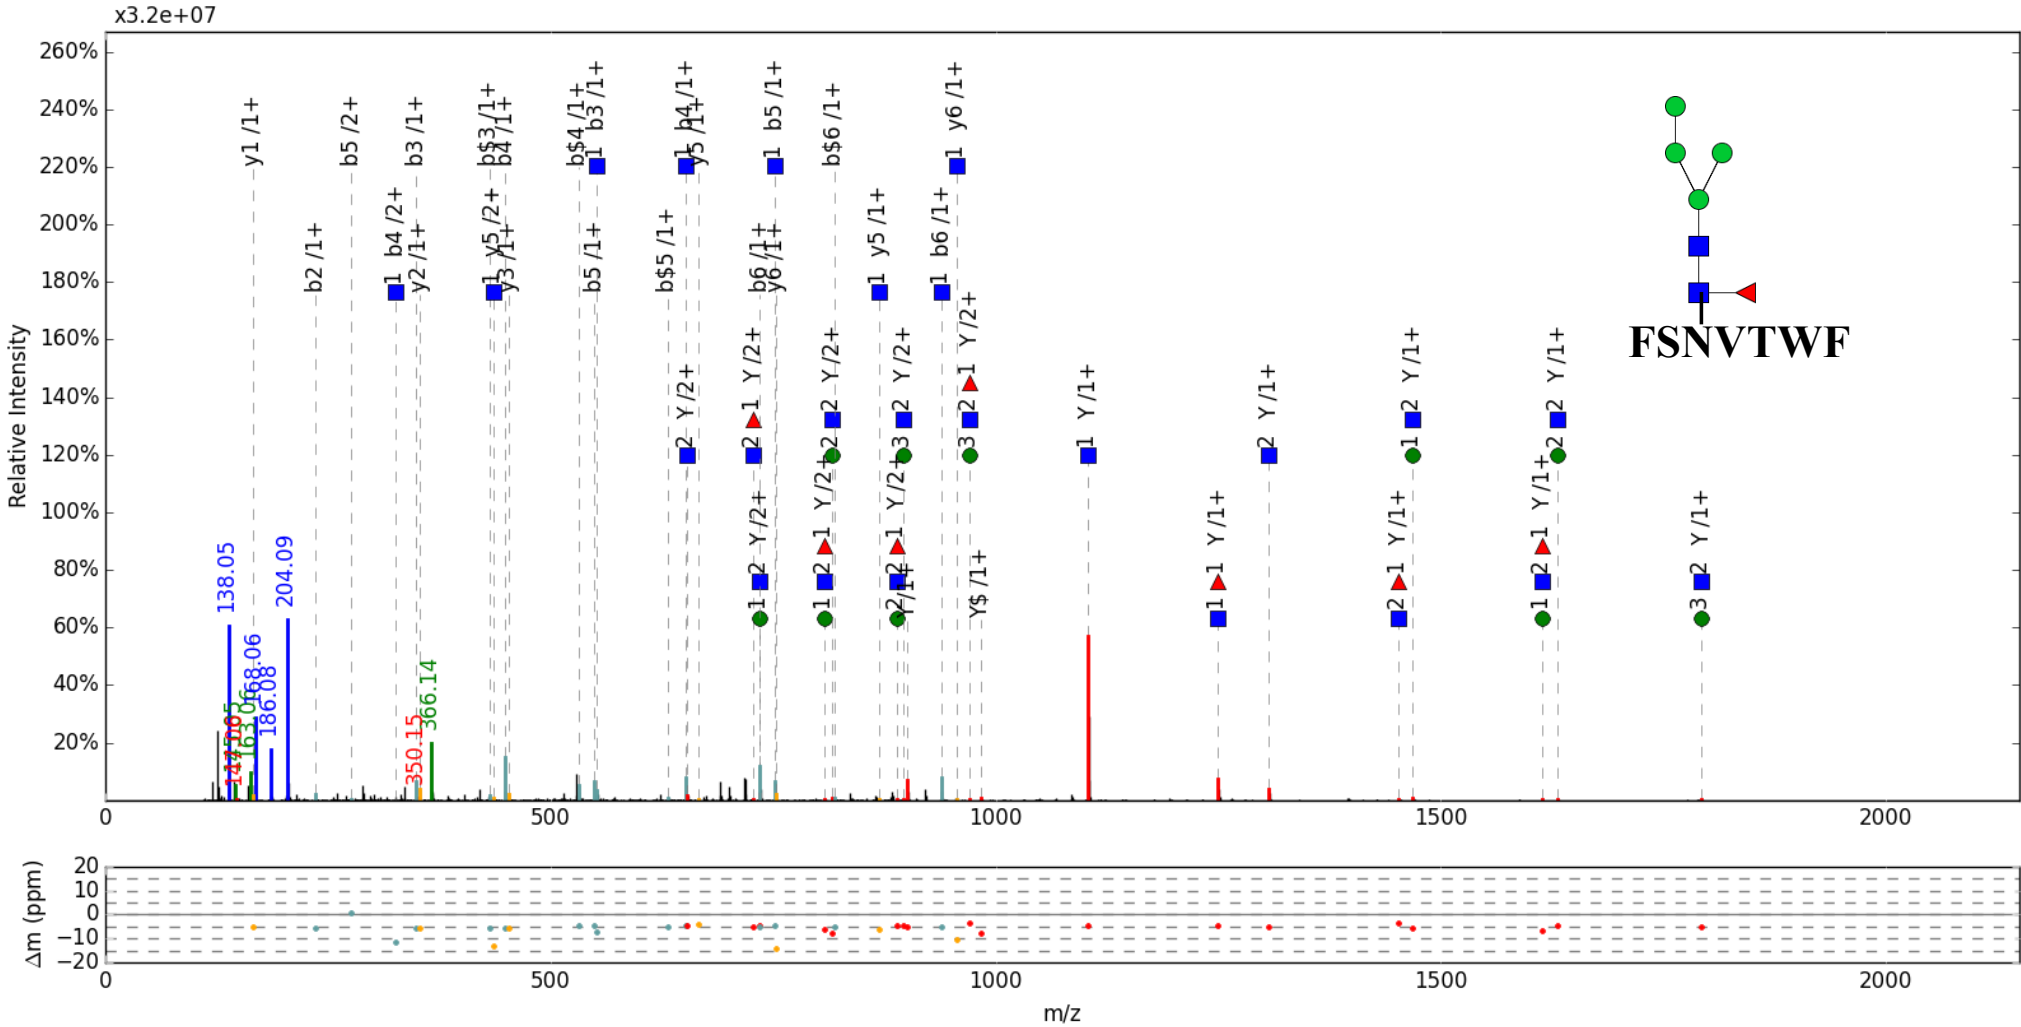

N61

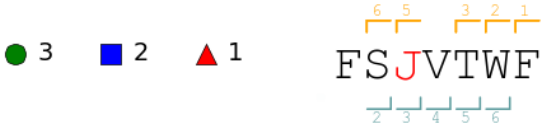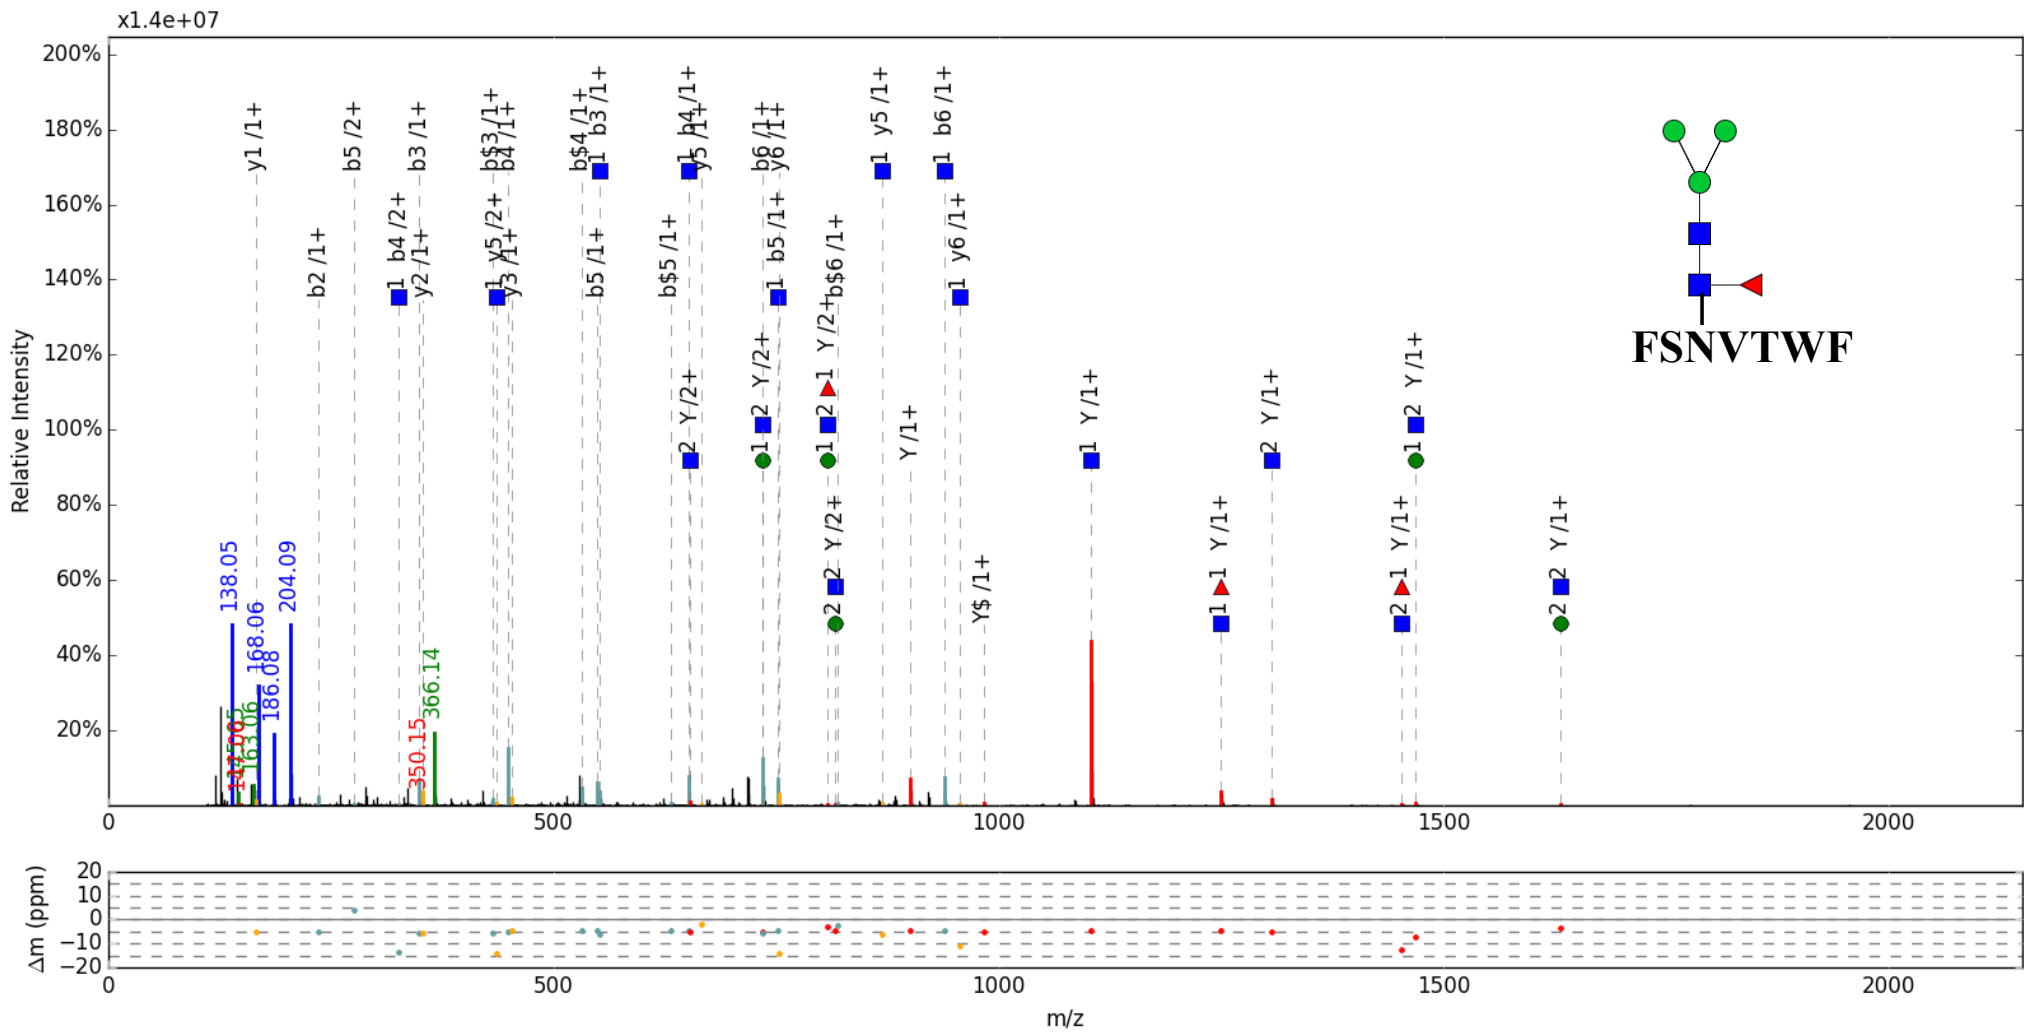

N74

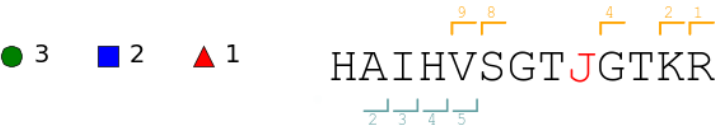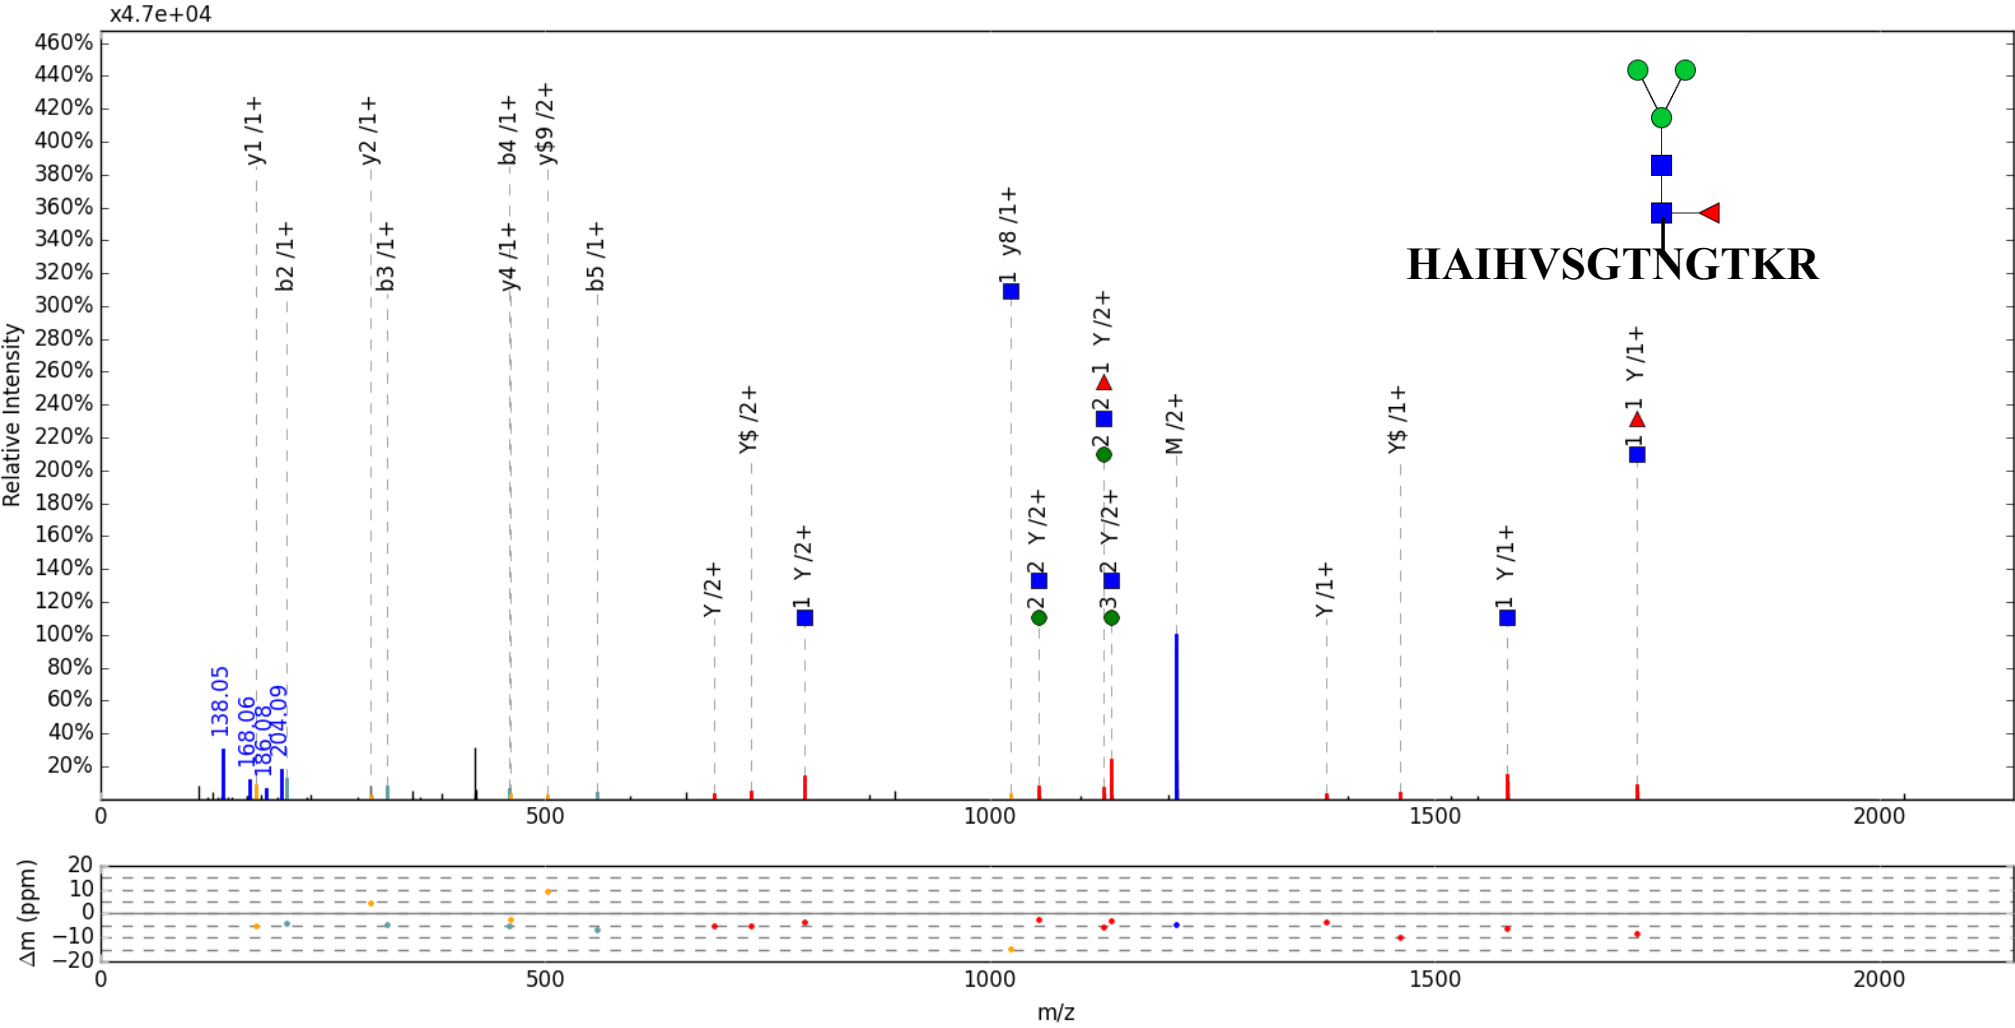

N74

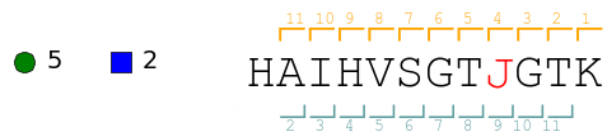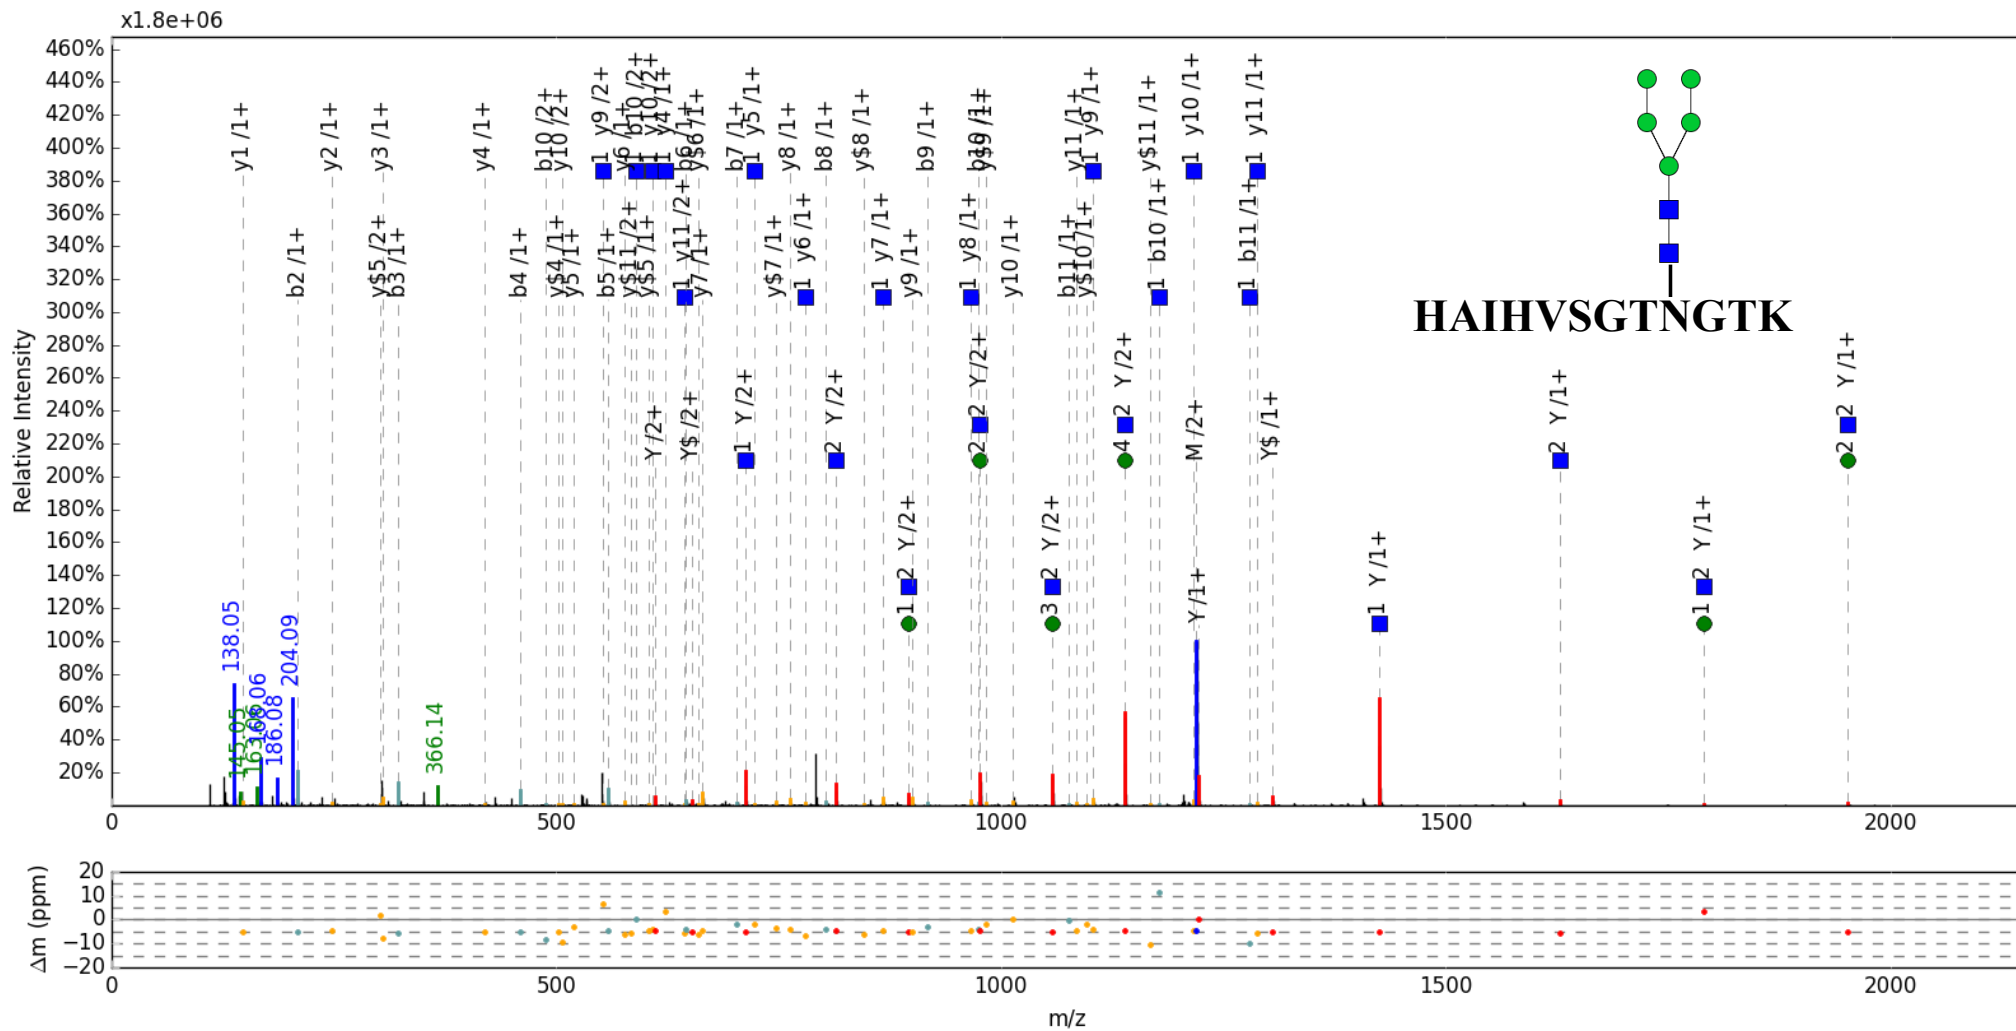

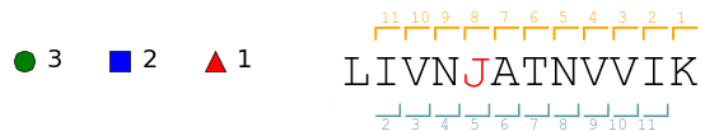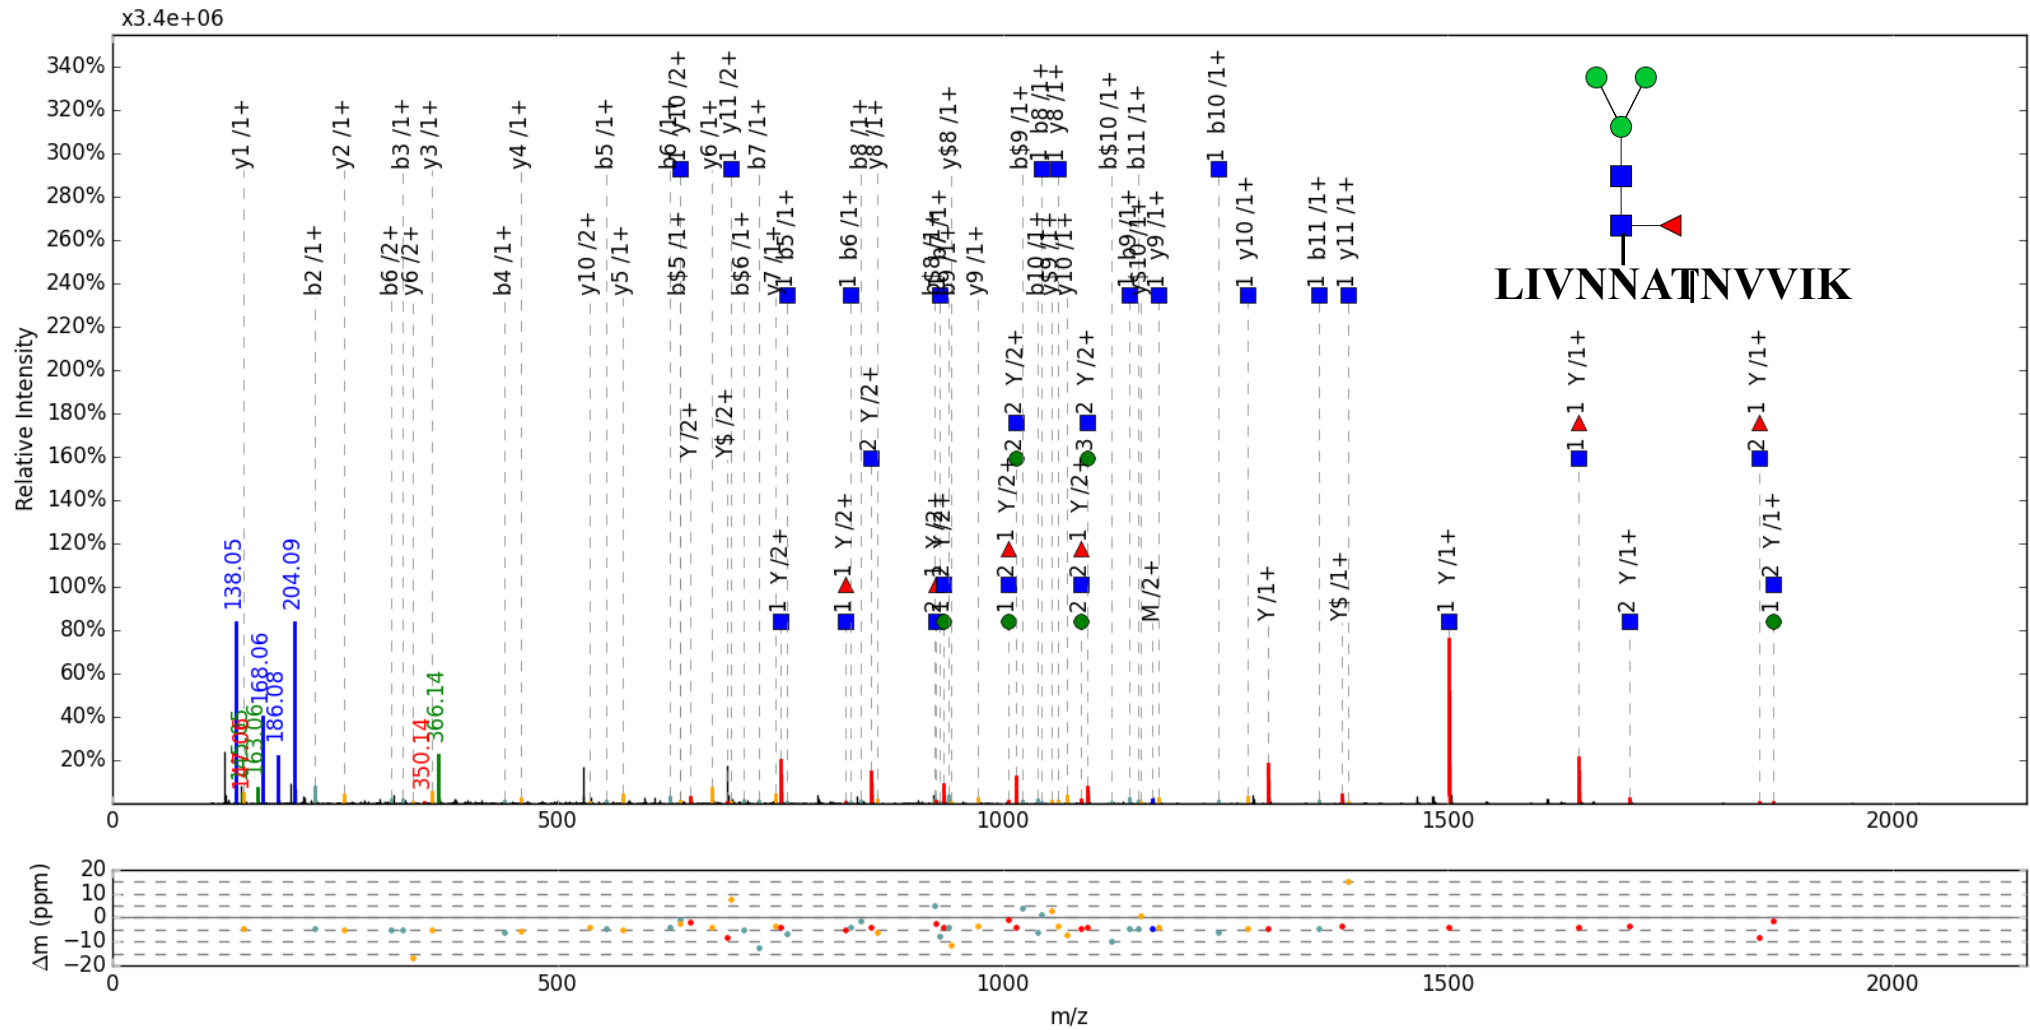

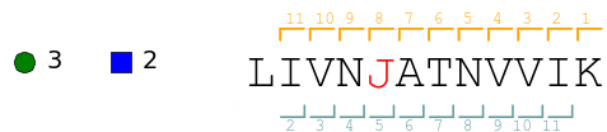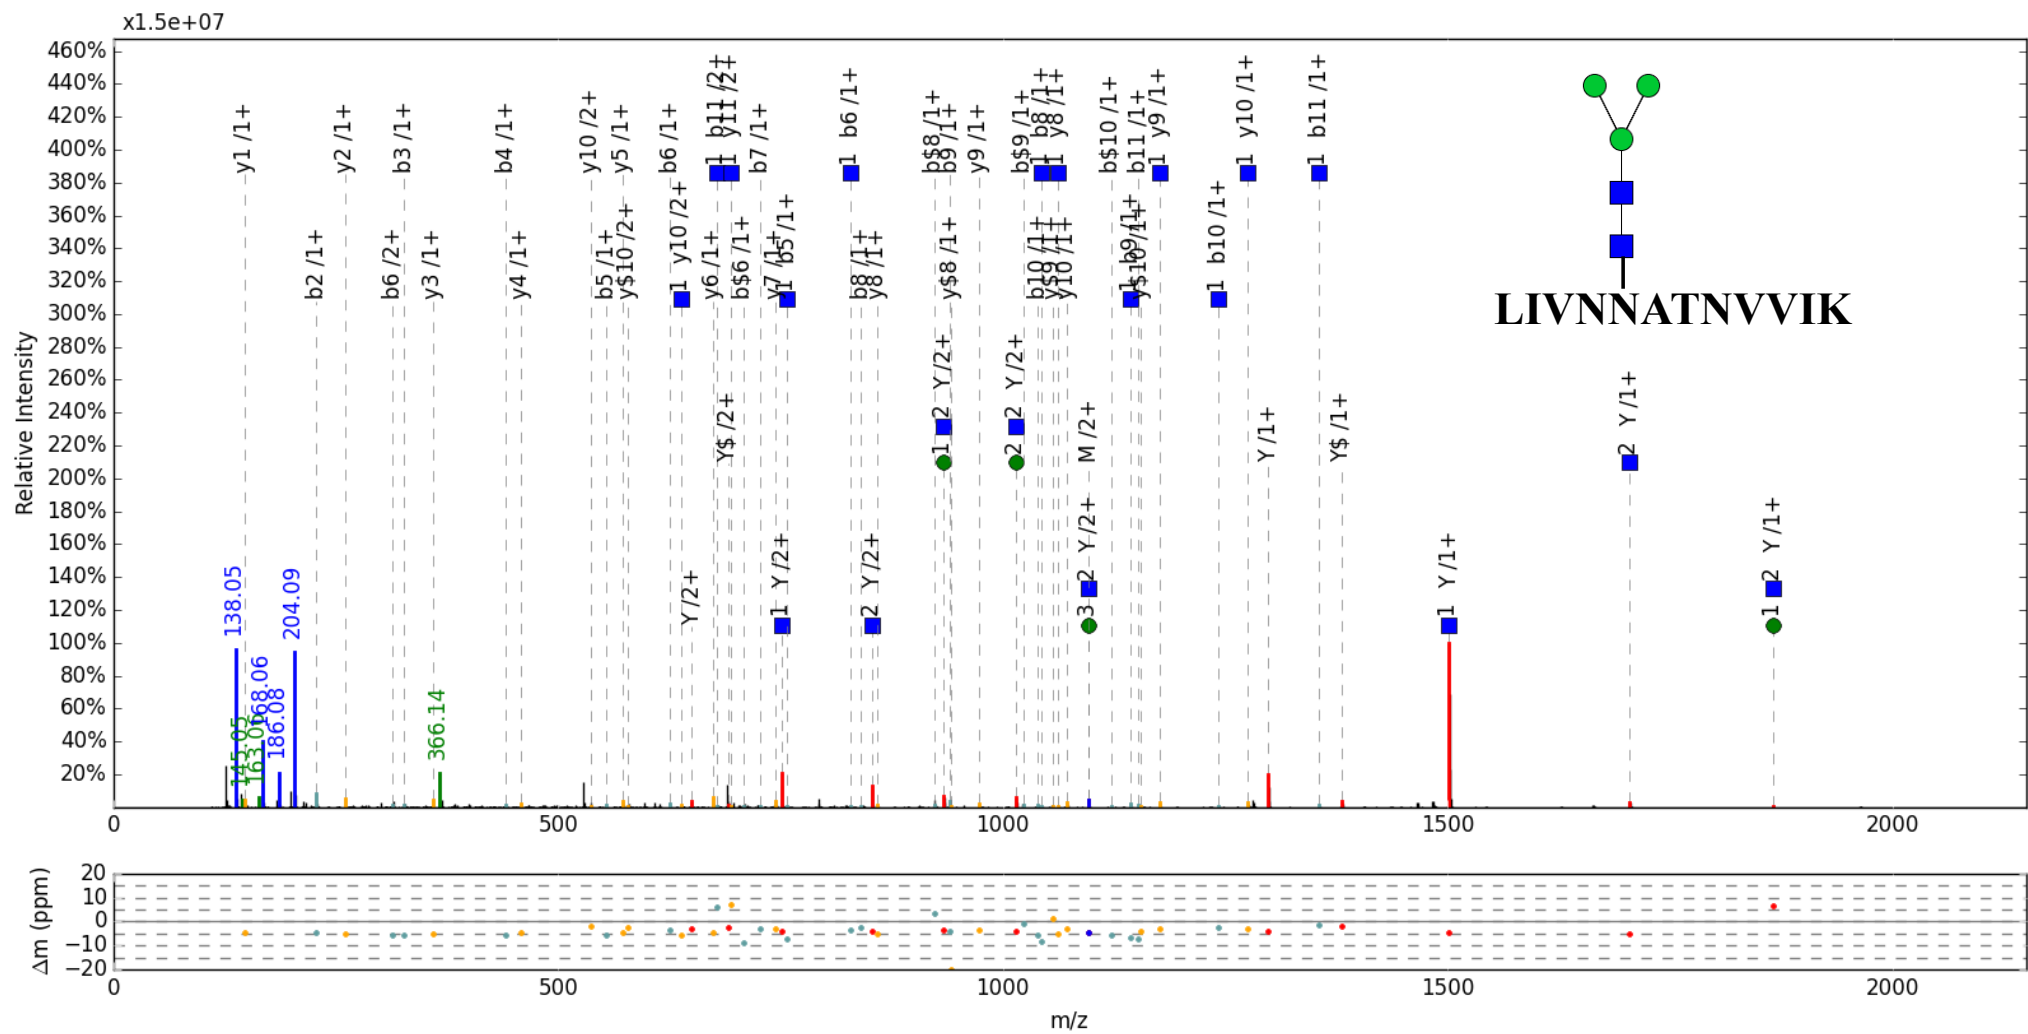



N149

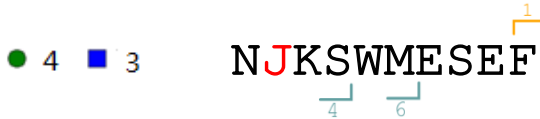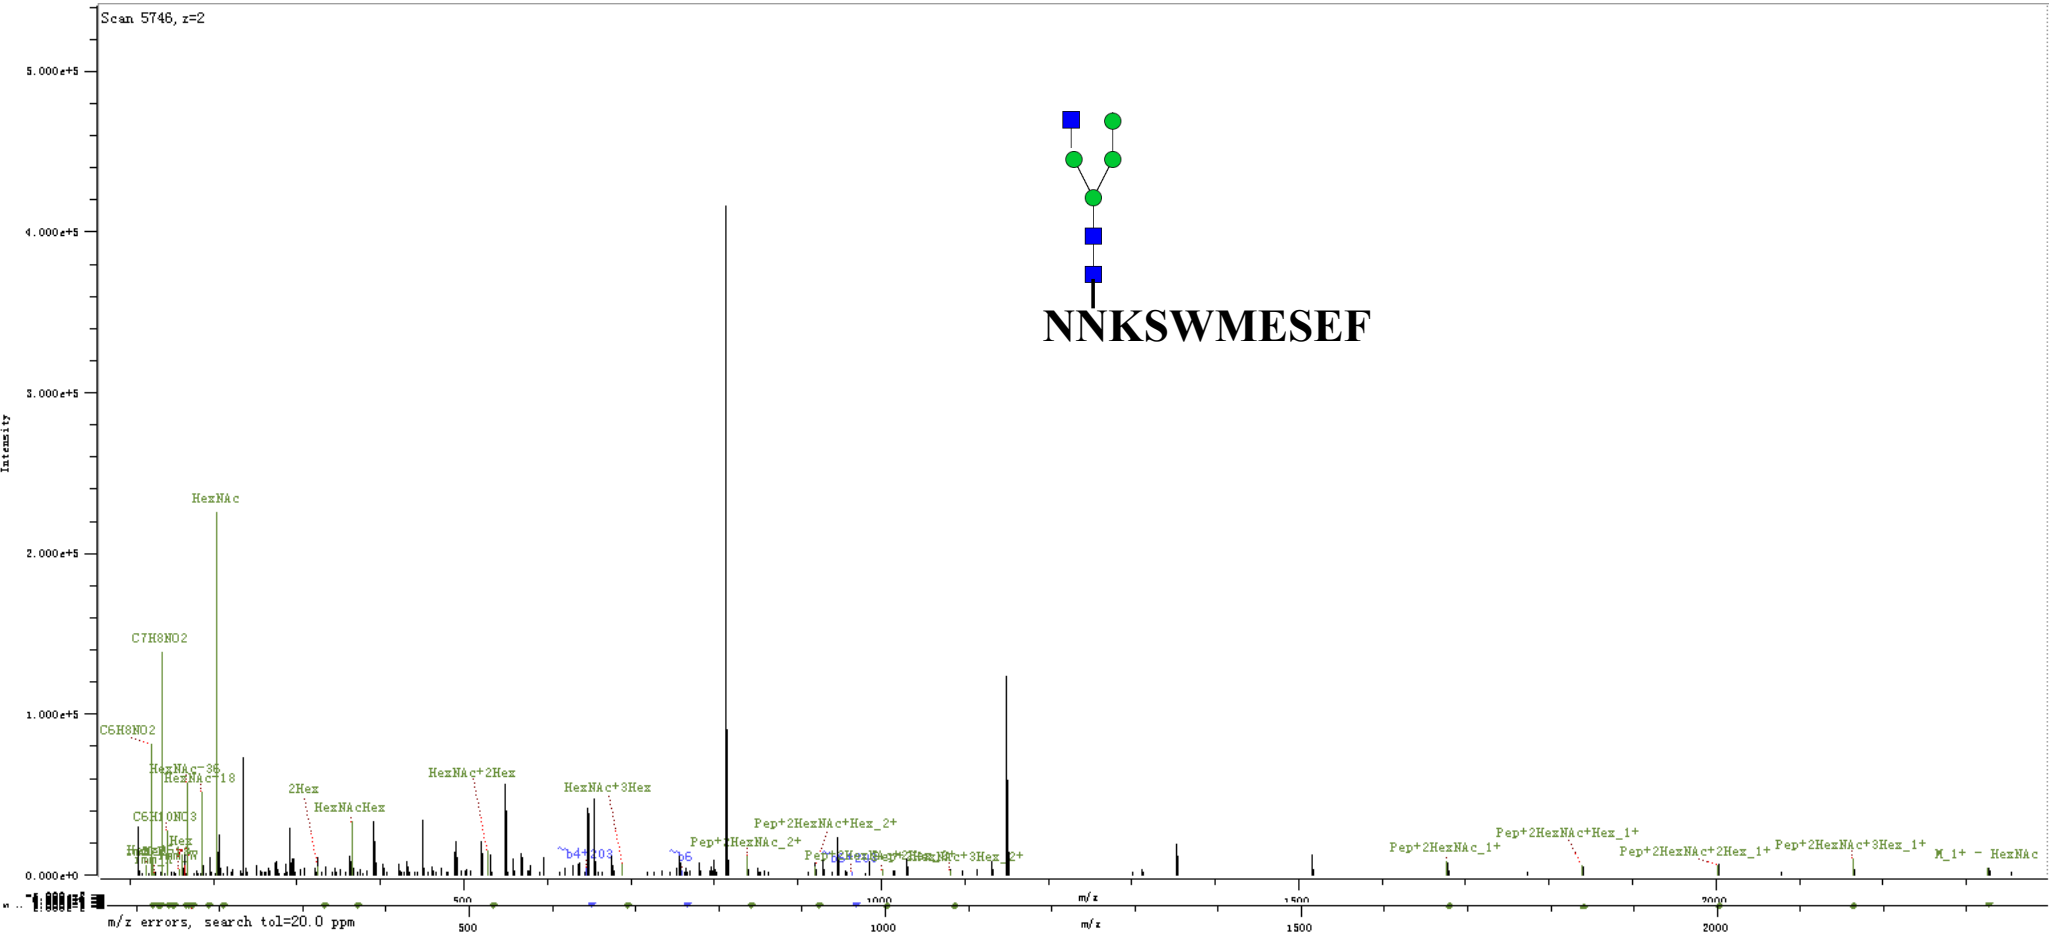

N165

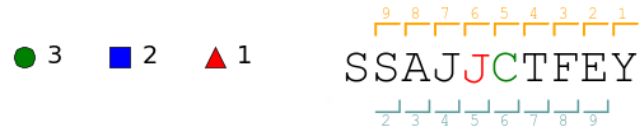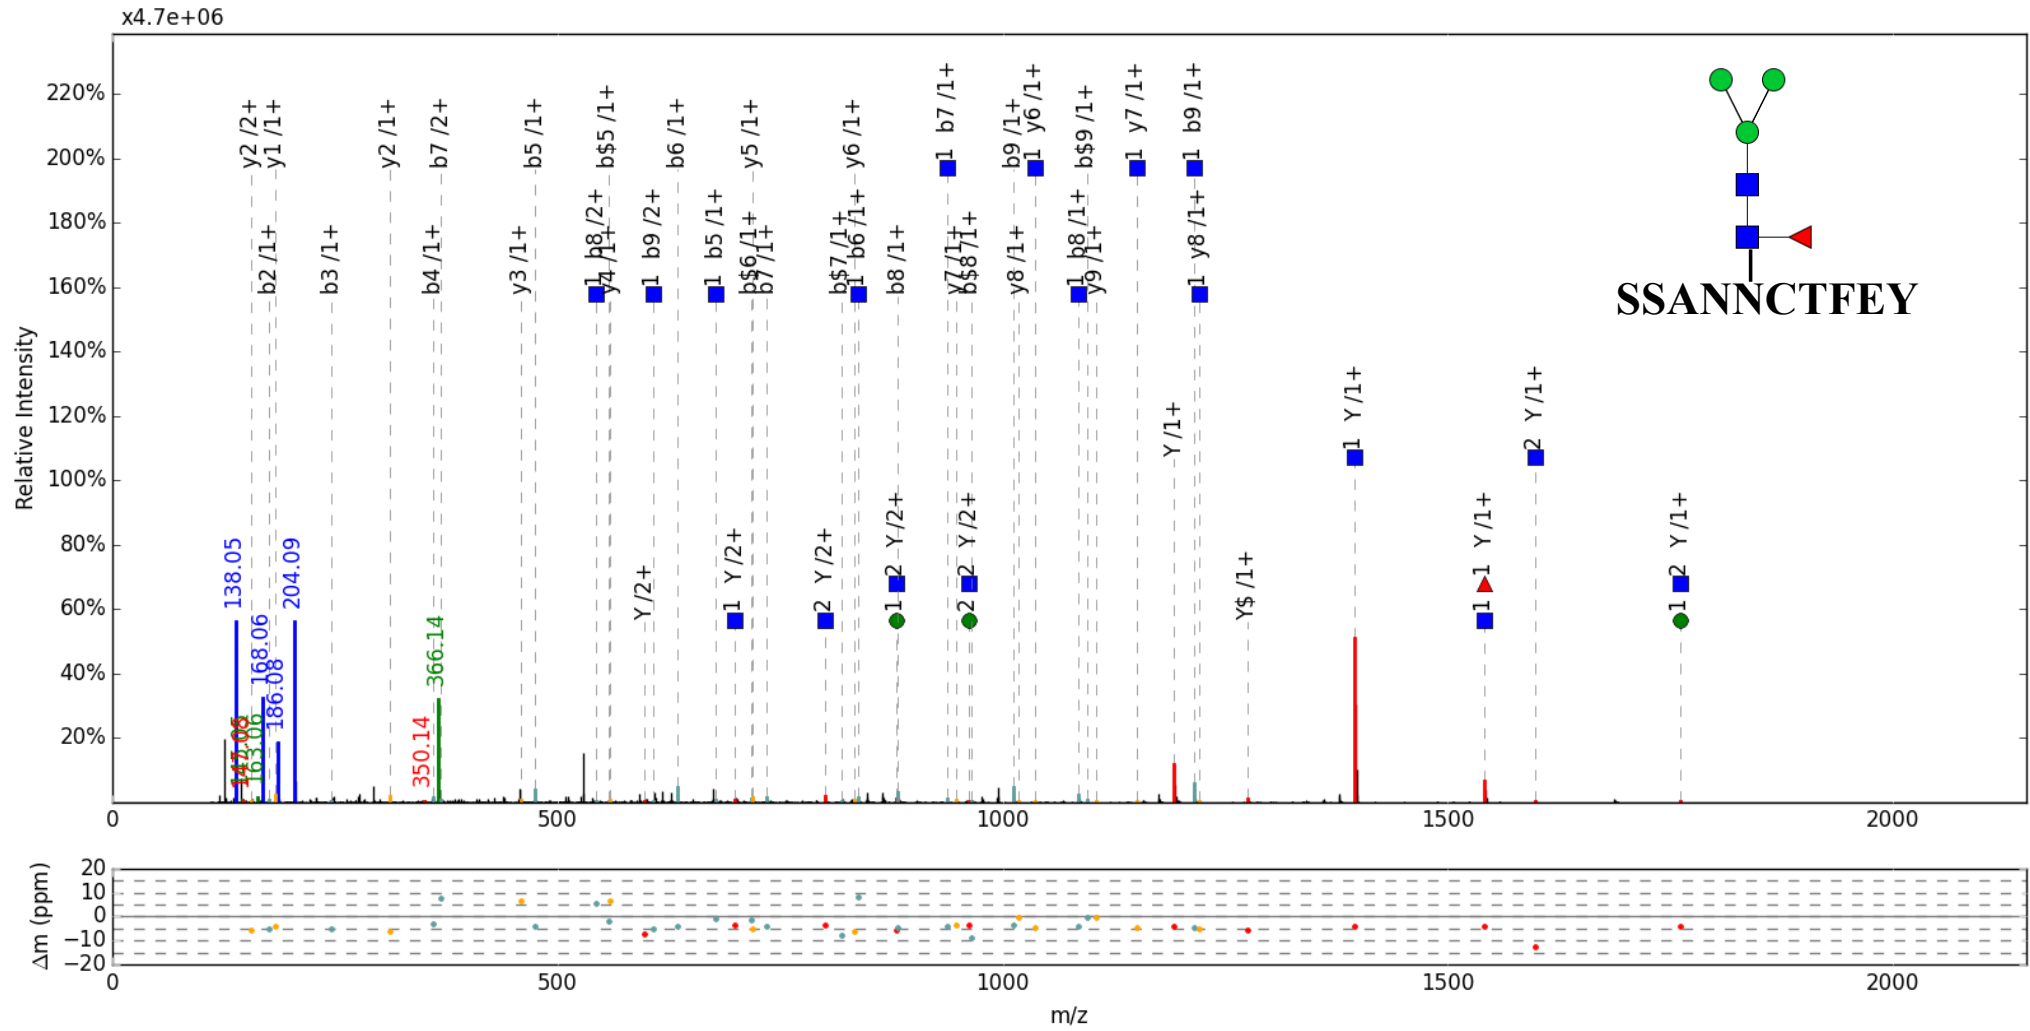

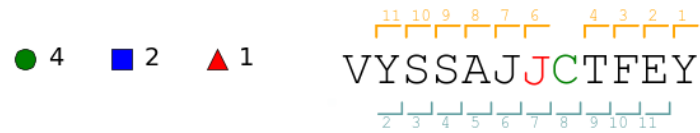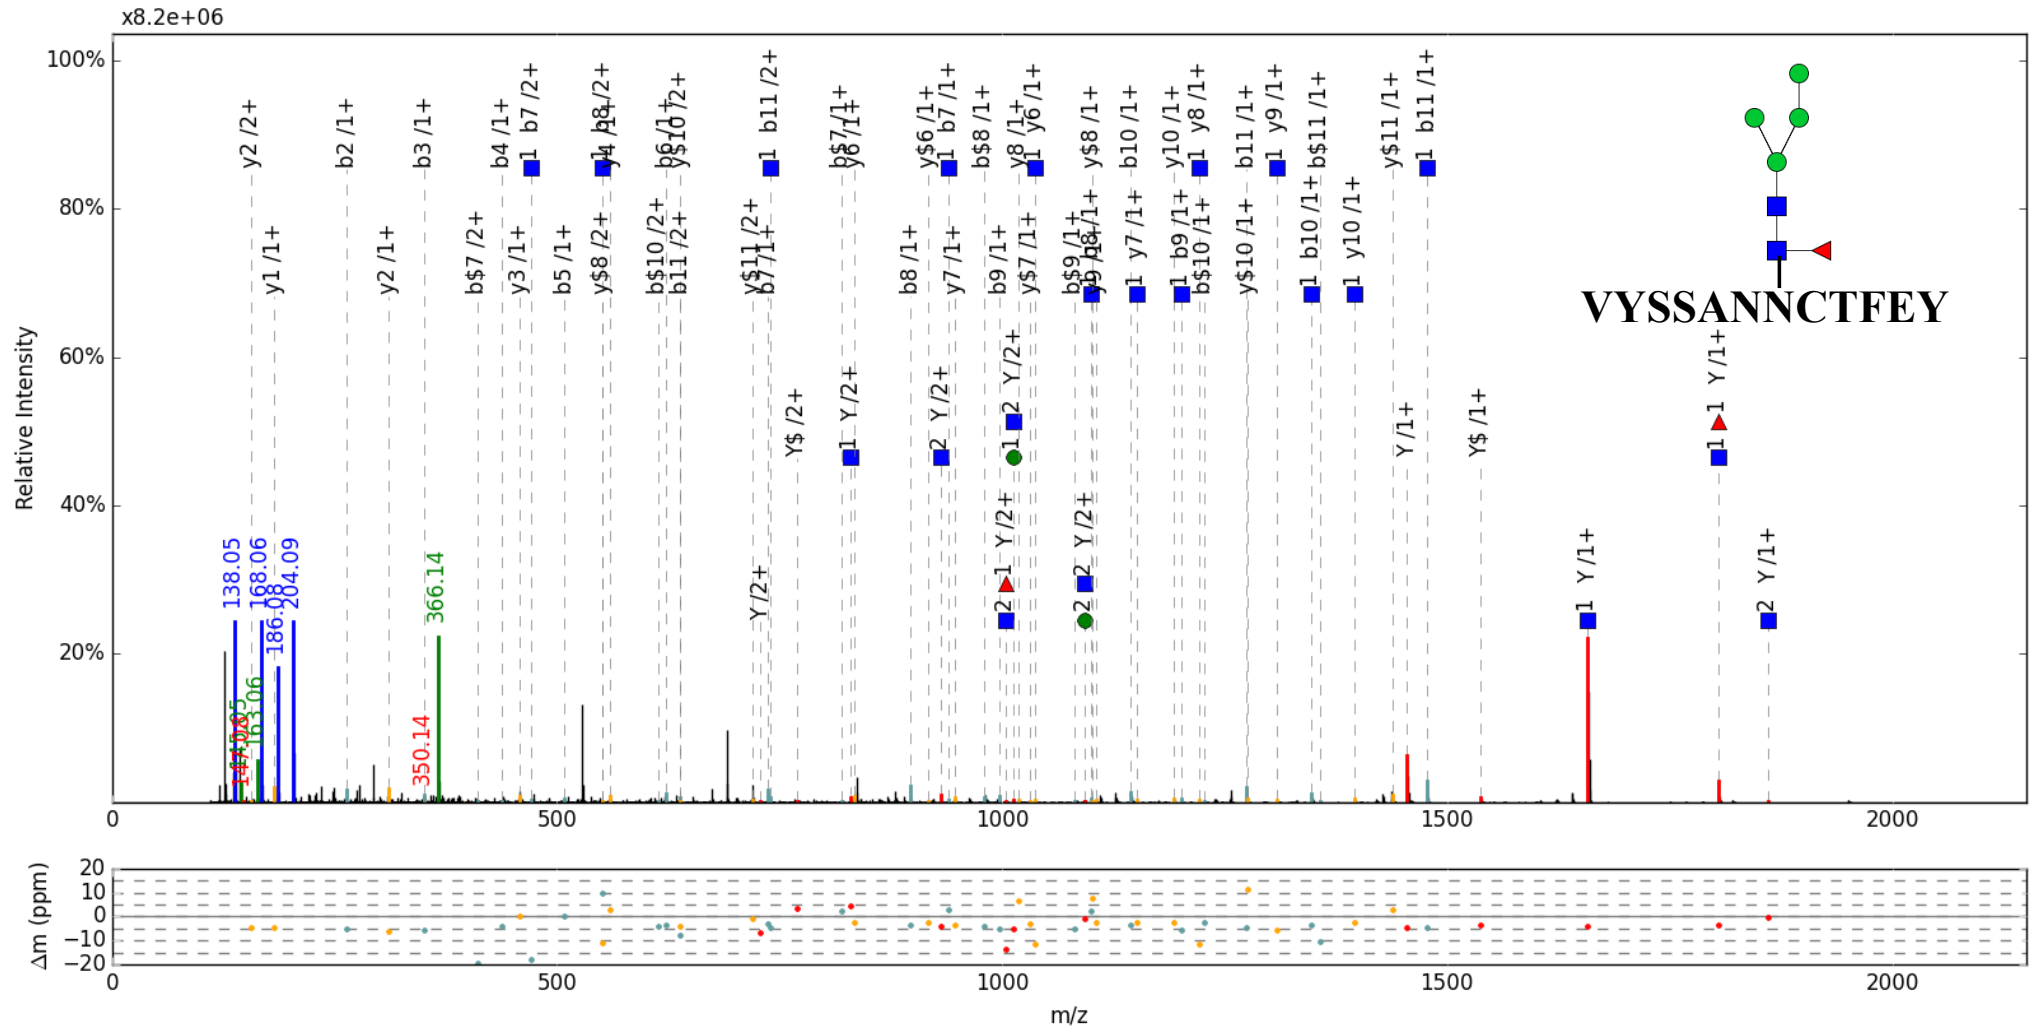

N234

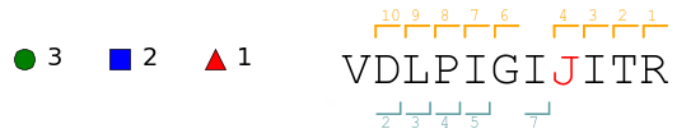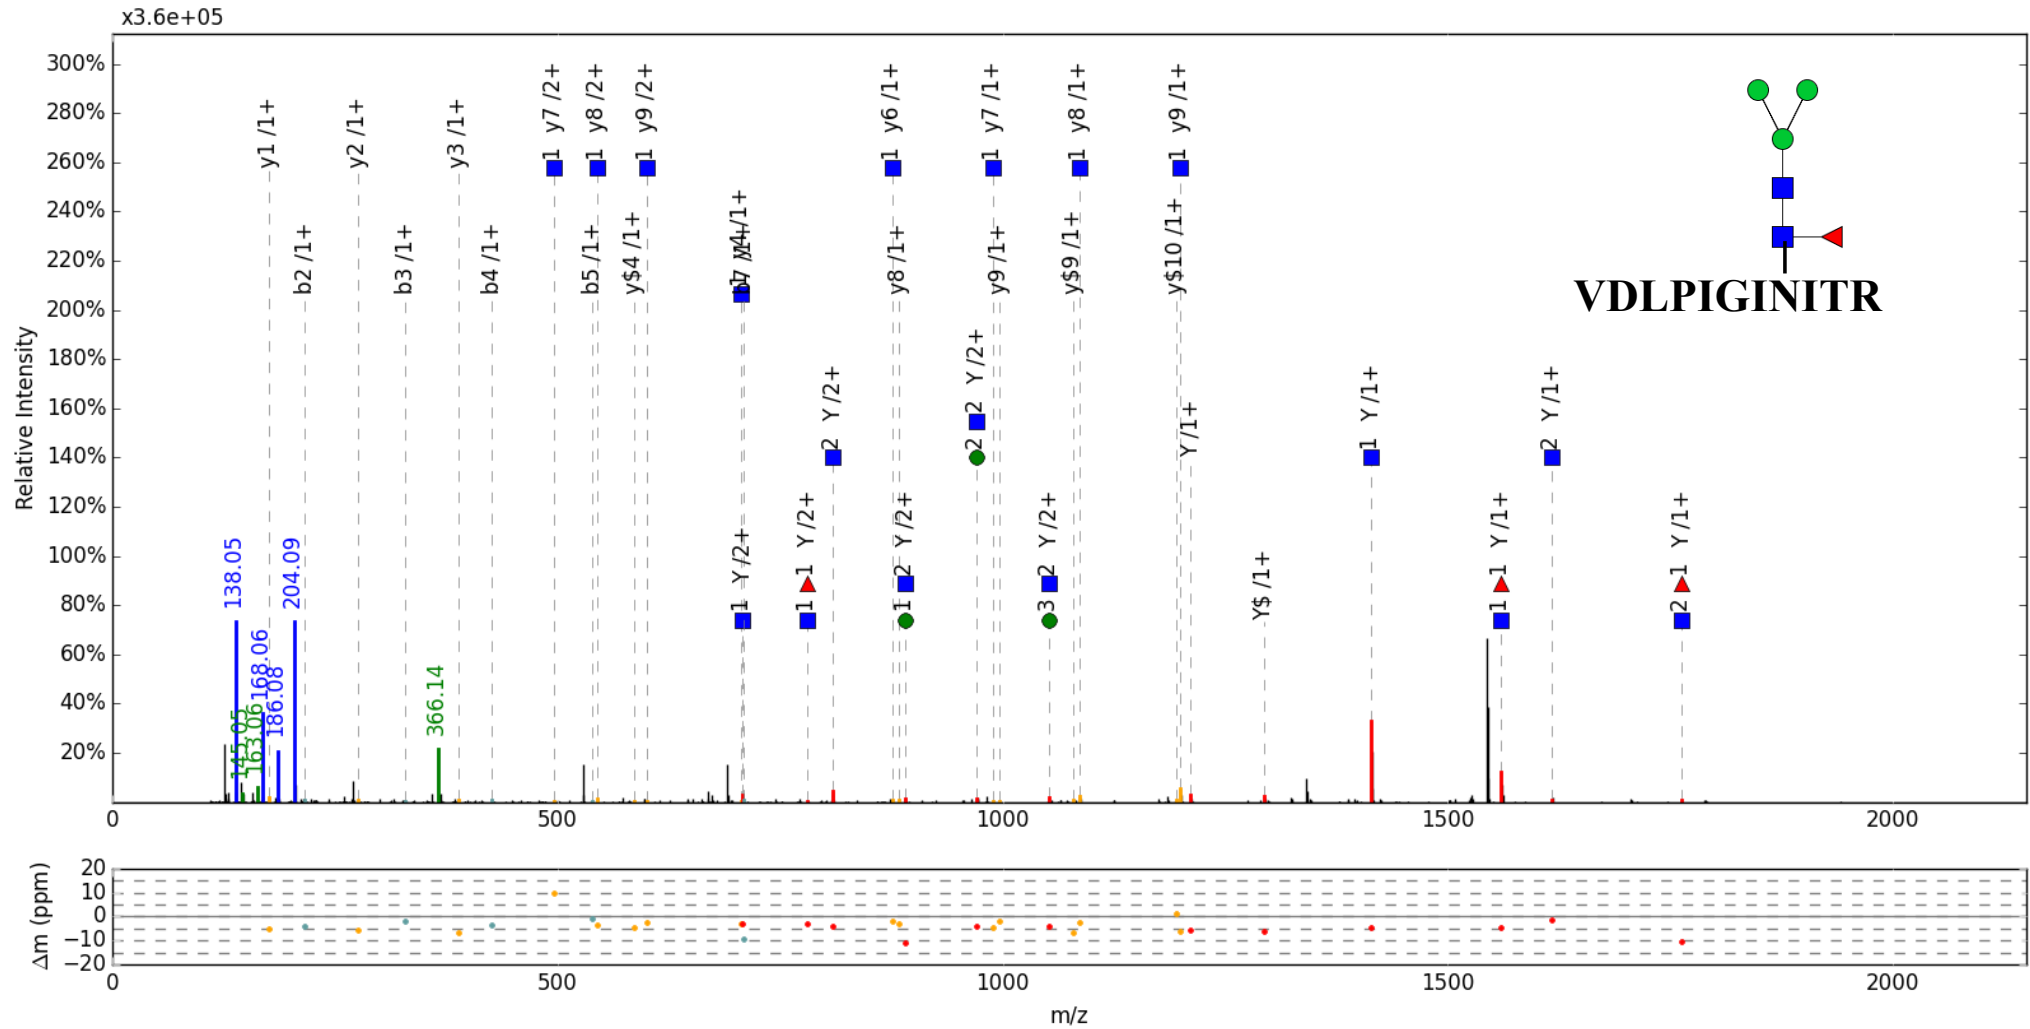

N282

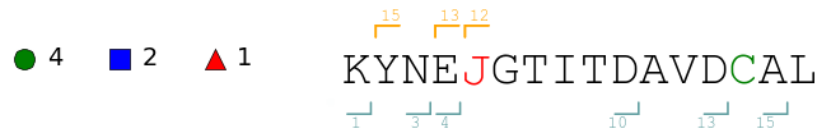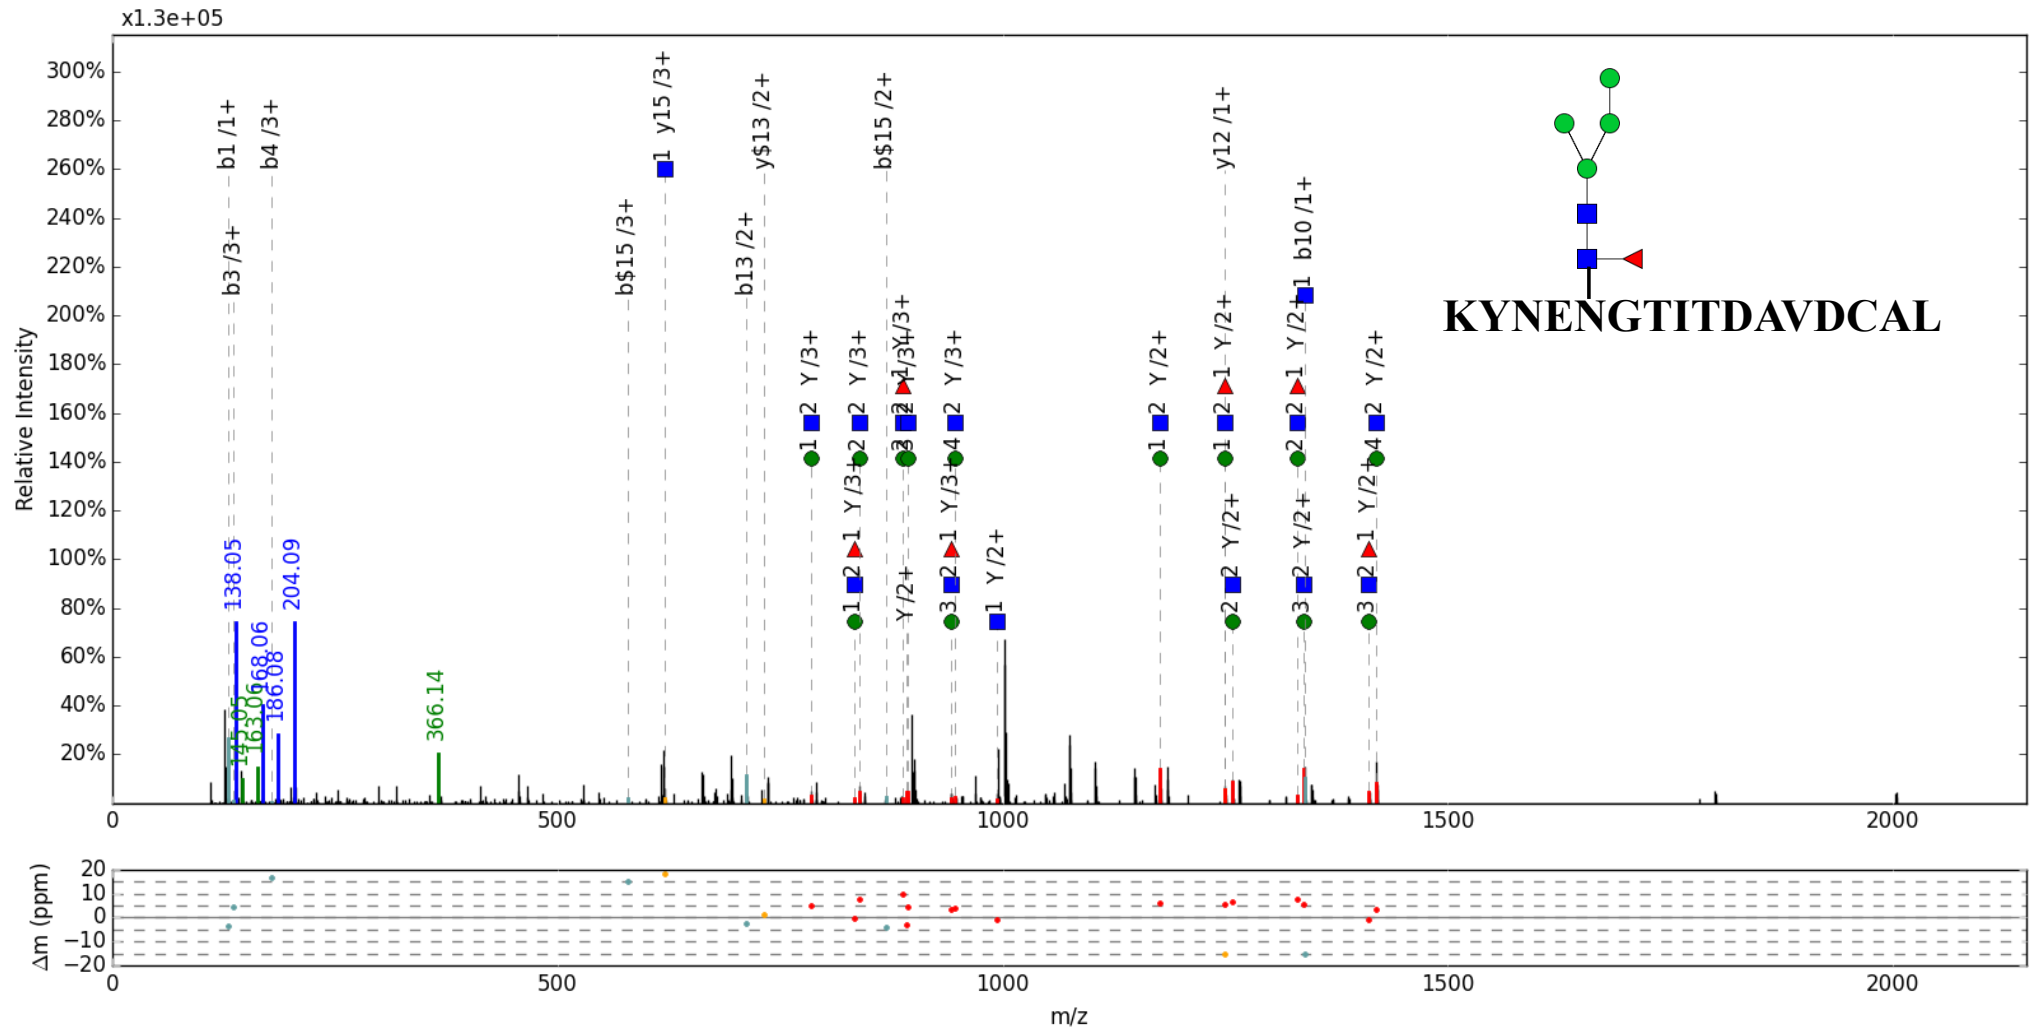

N331

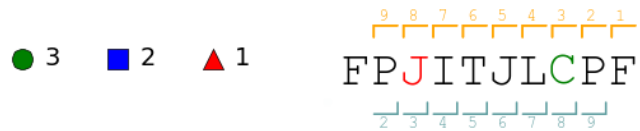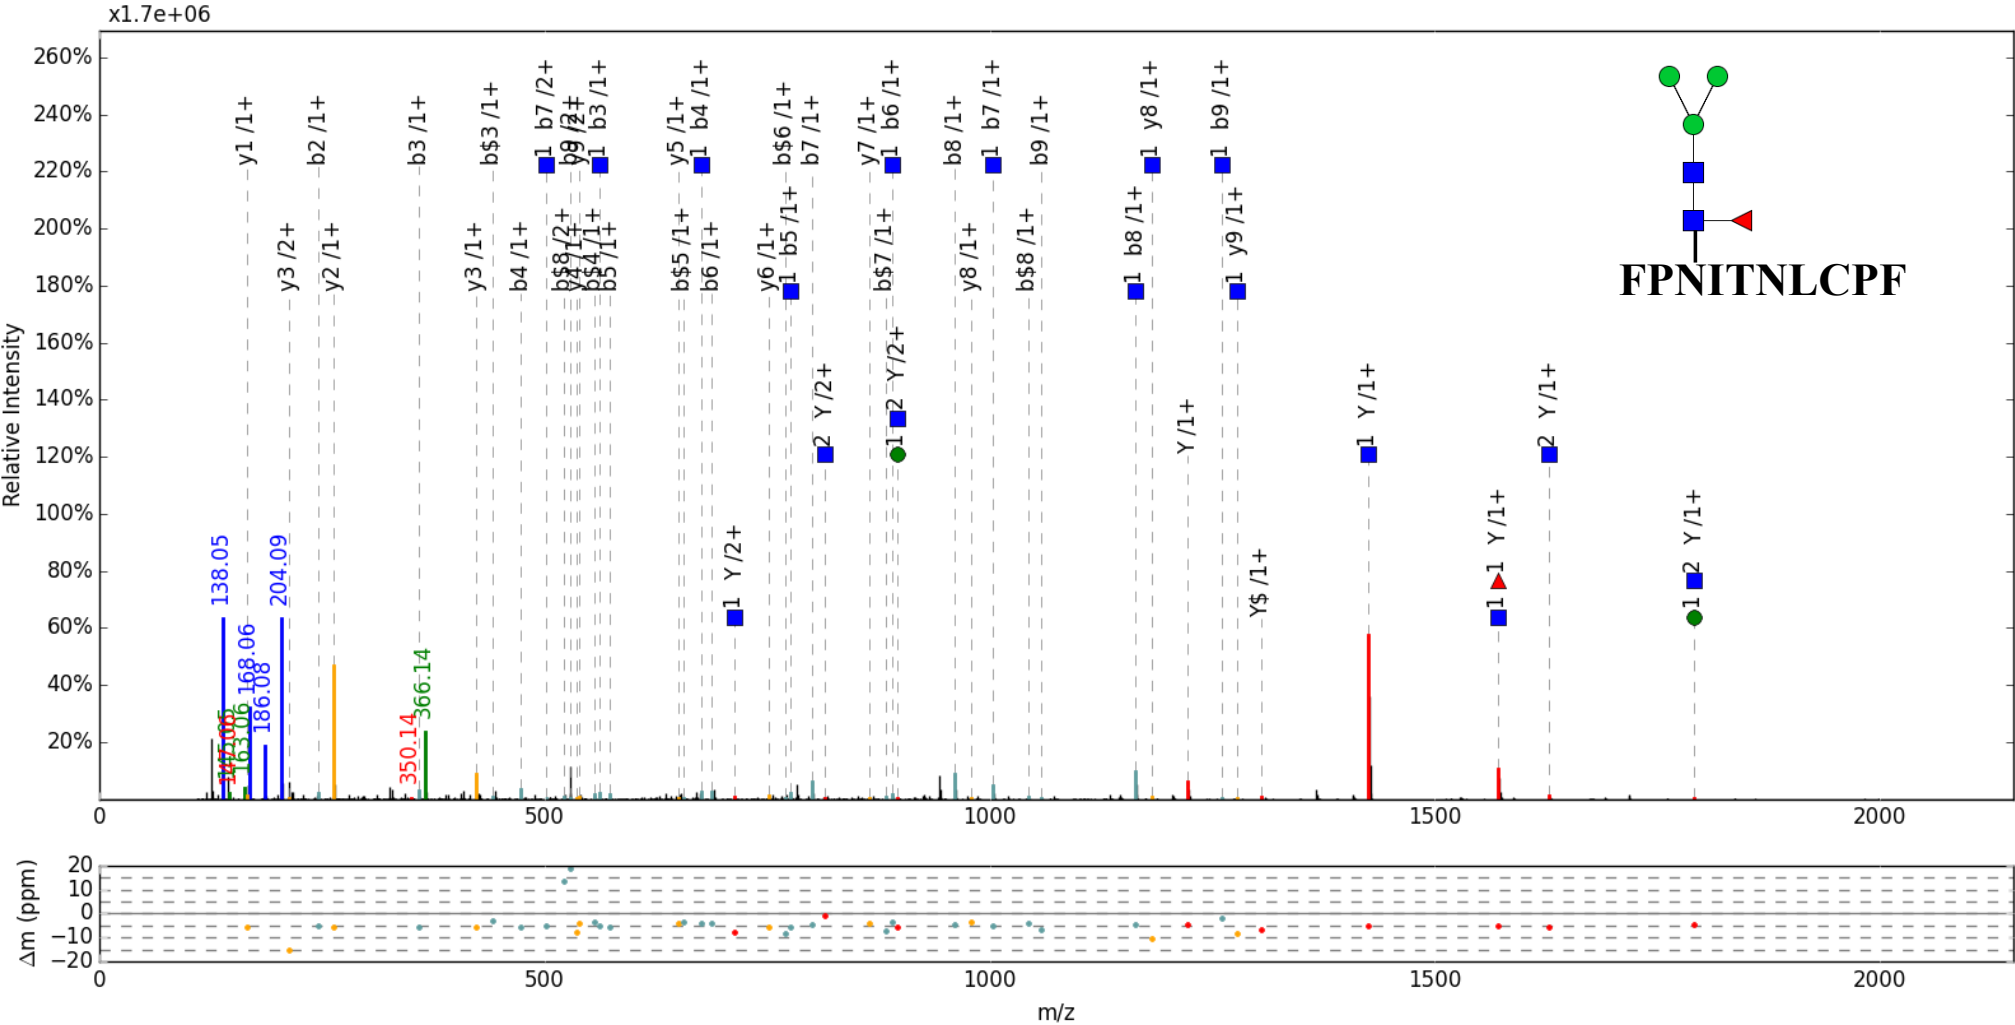

N331

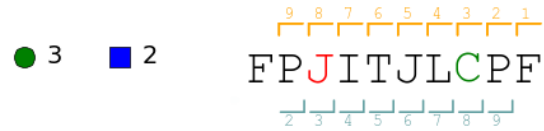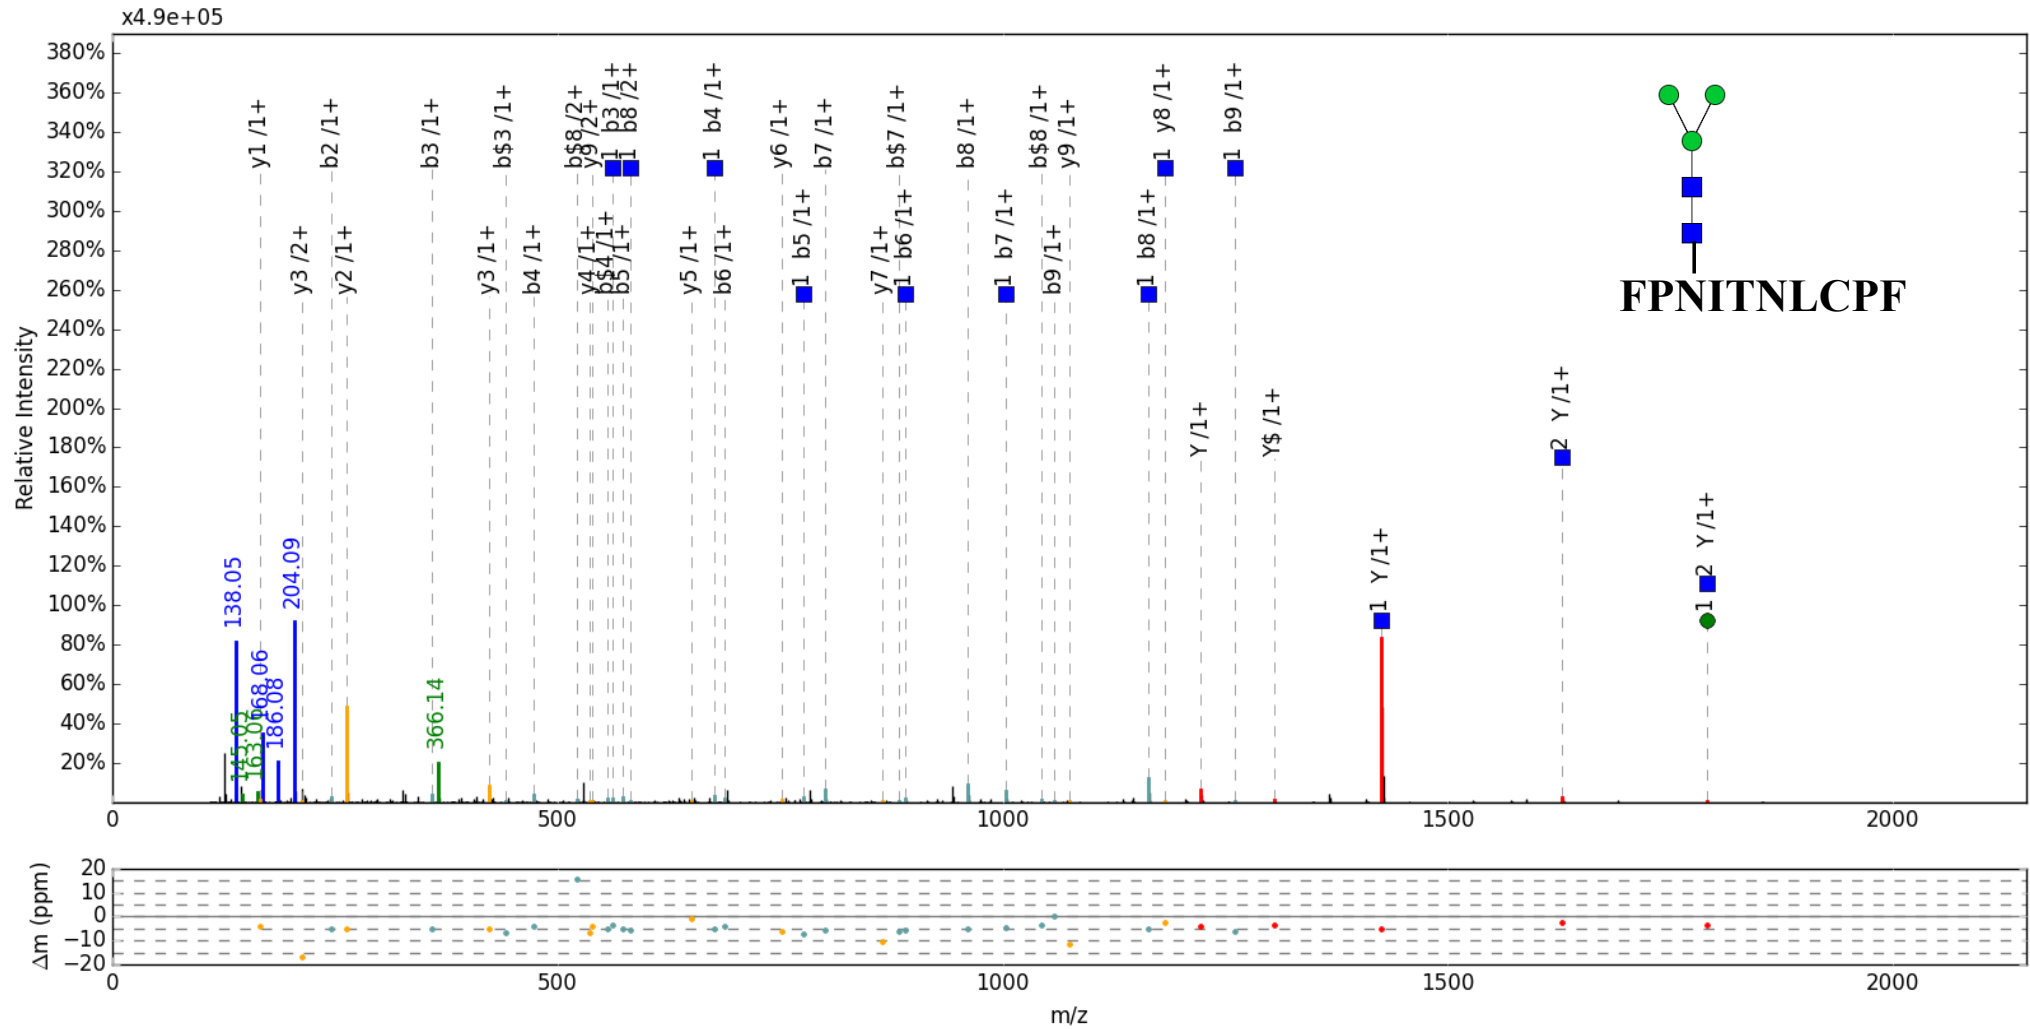

N343

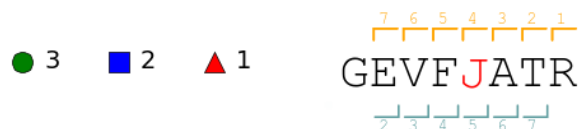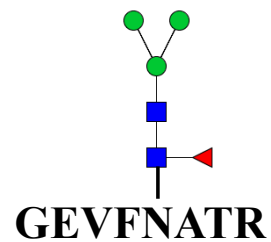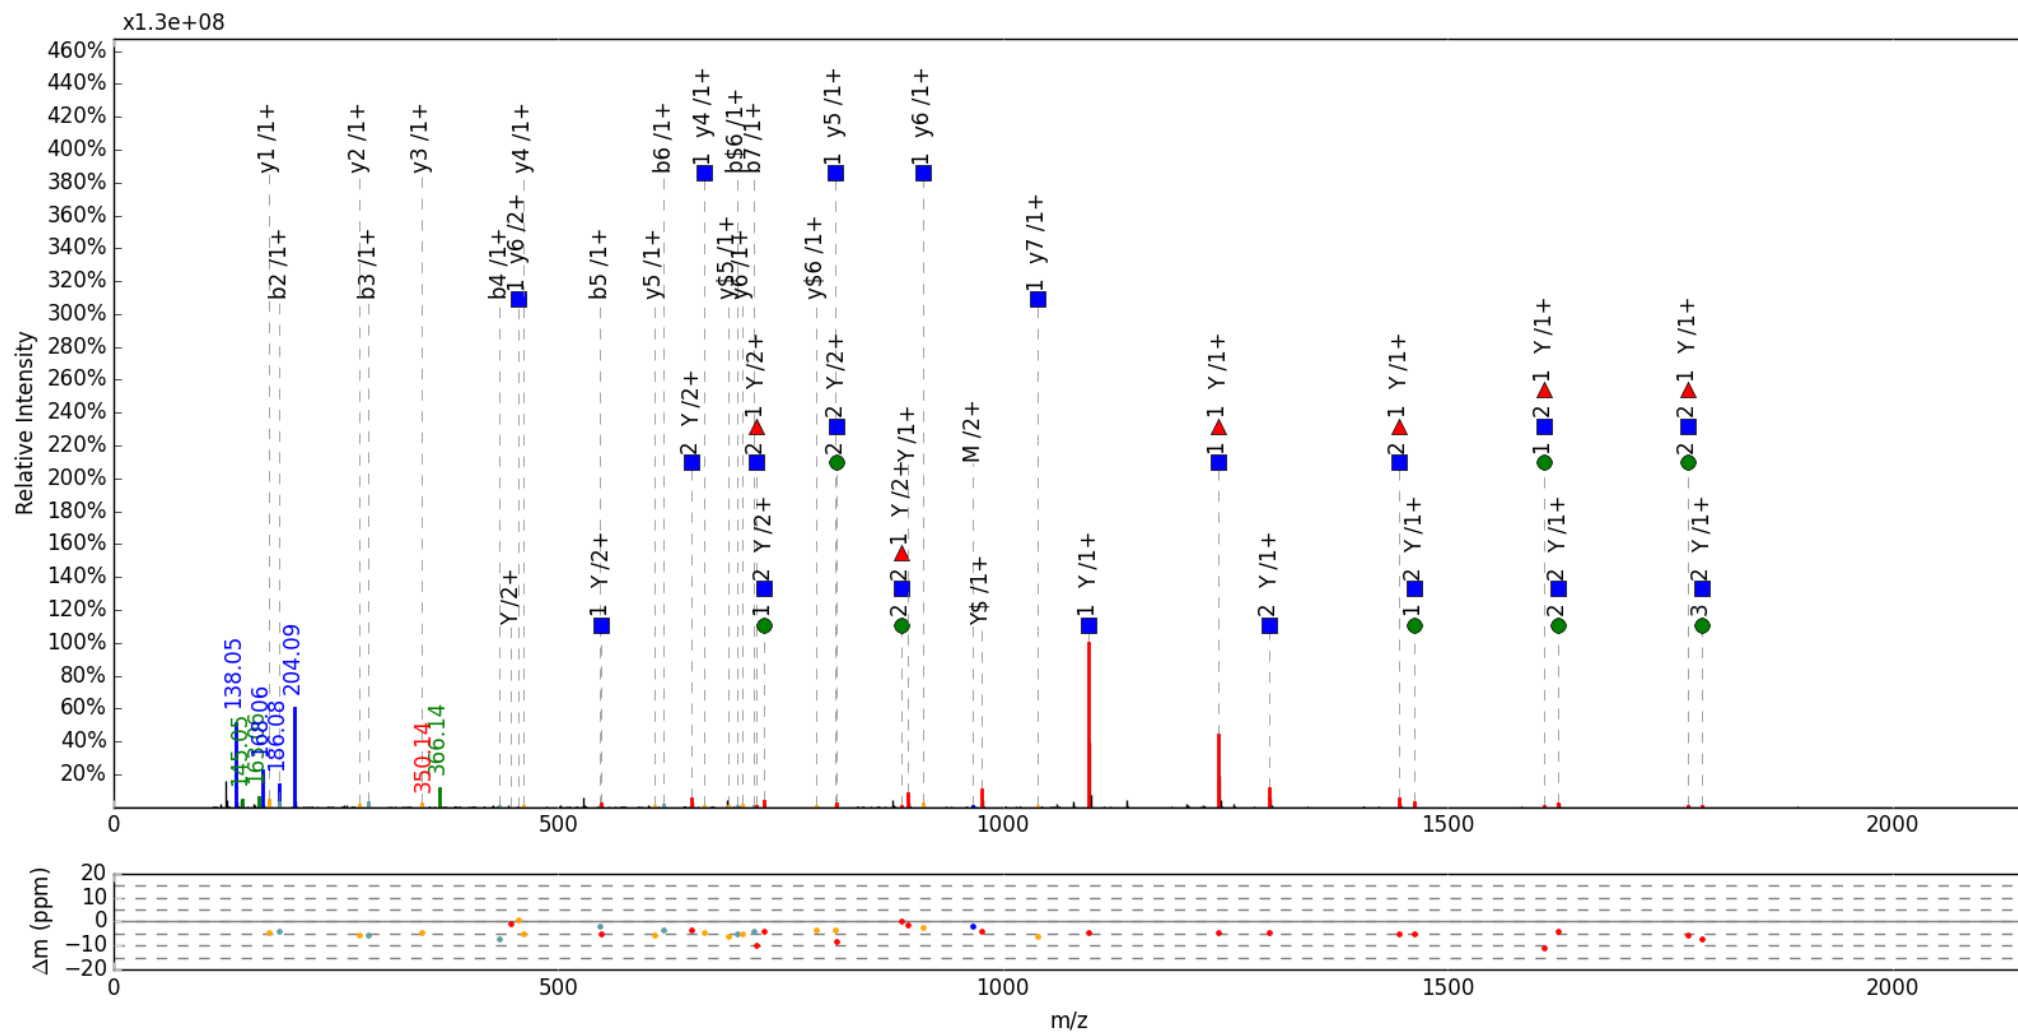



N603

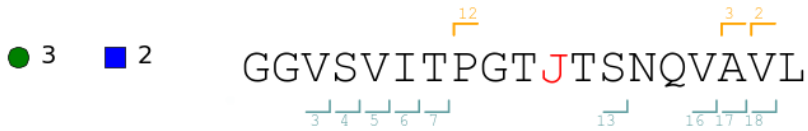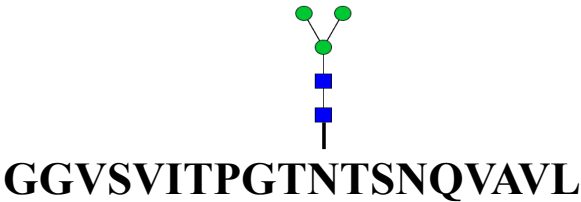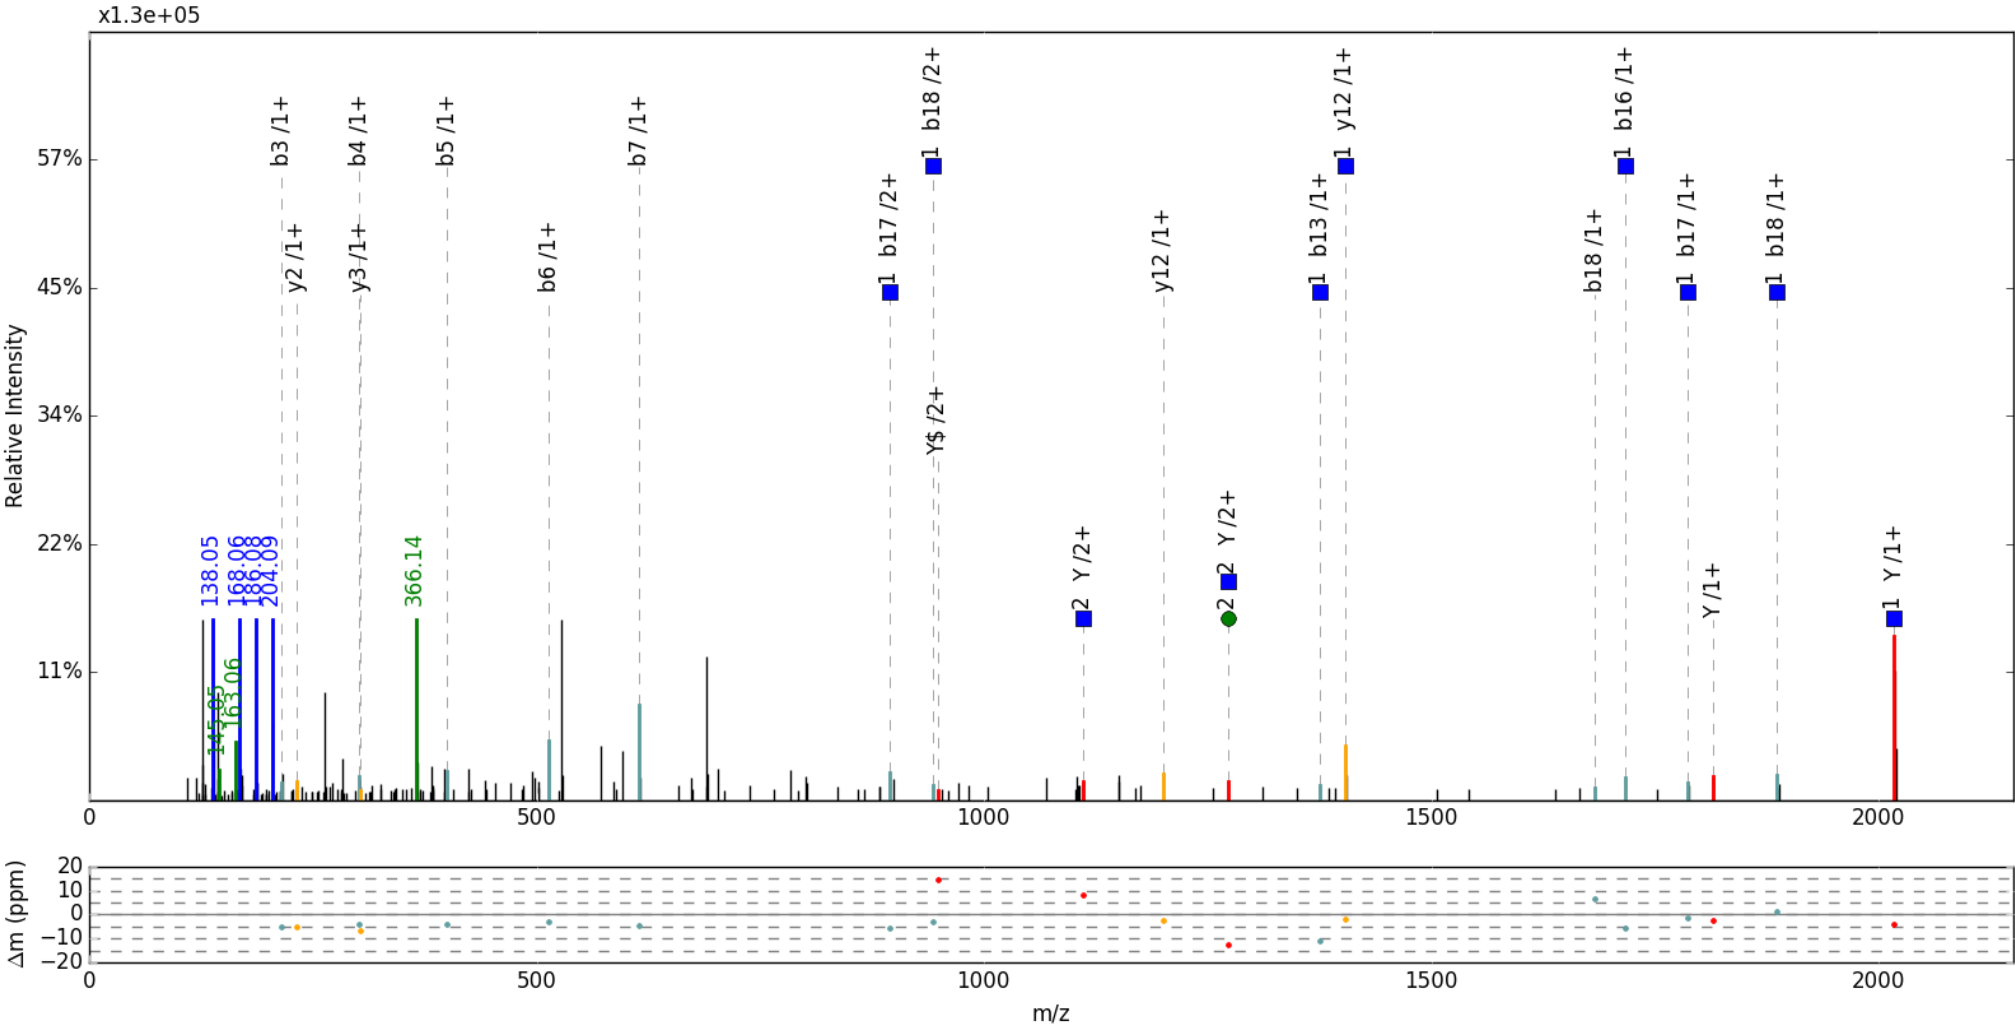

N603

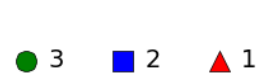

GGVSVITPGT**J**TSNQVAVLY

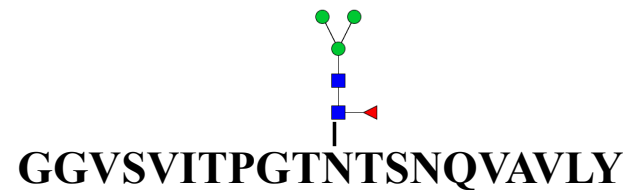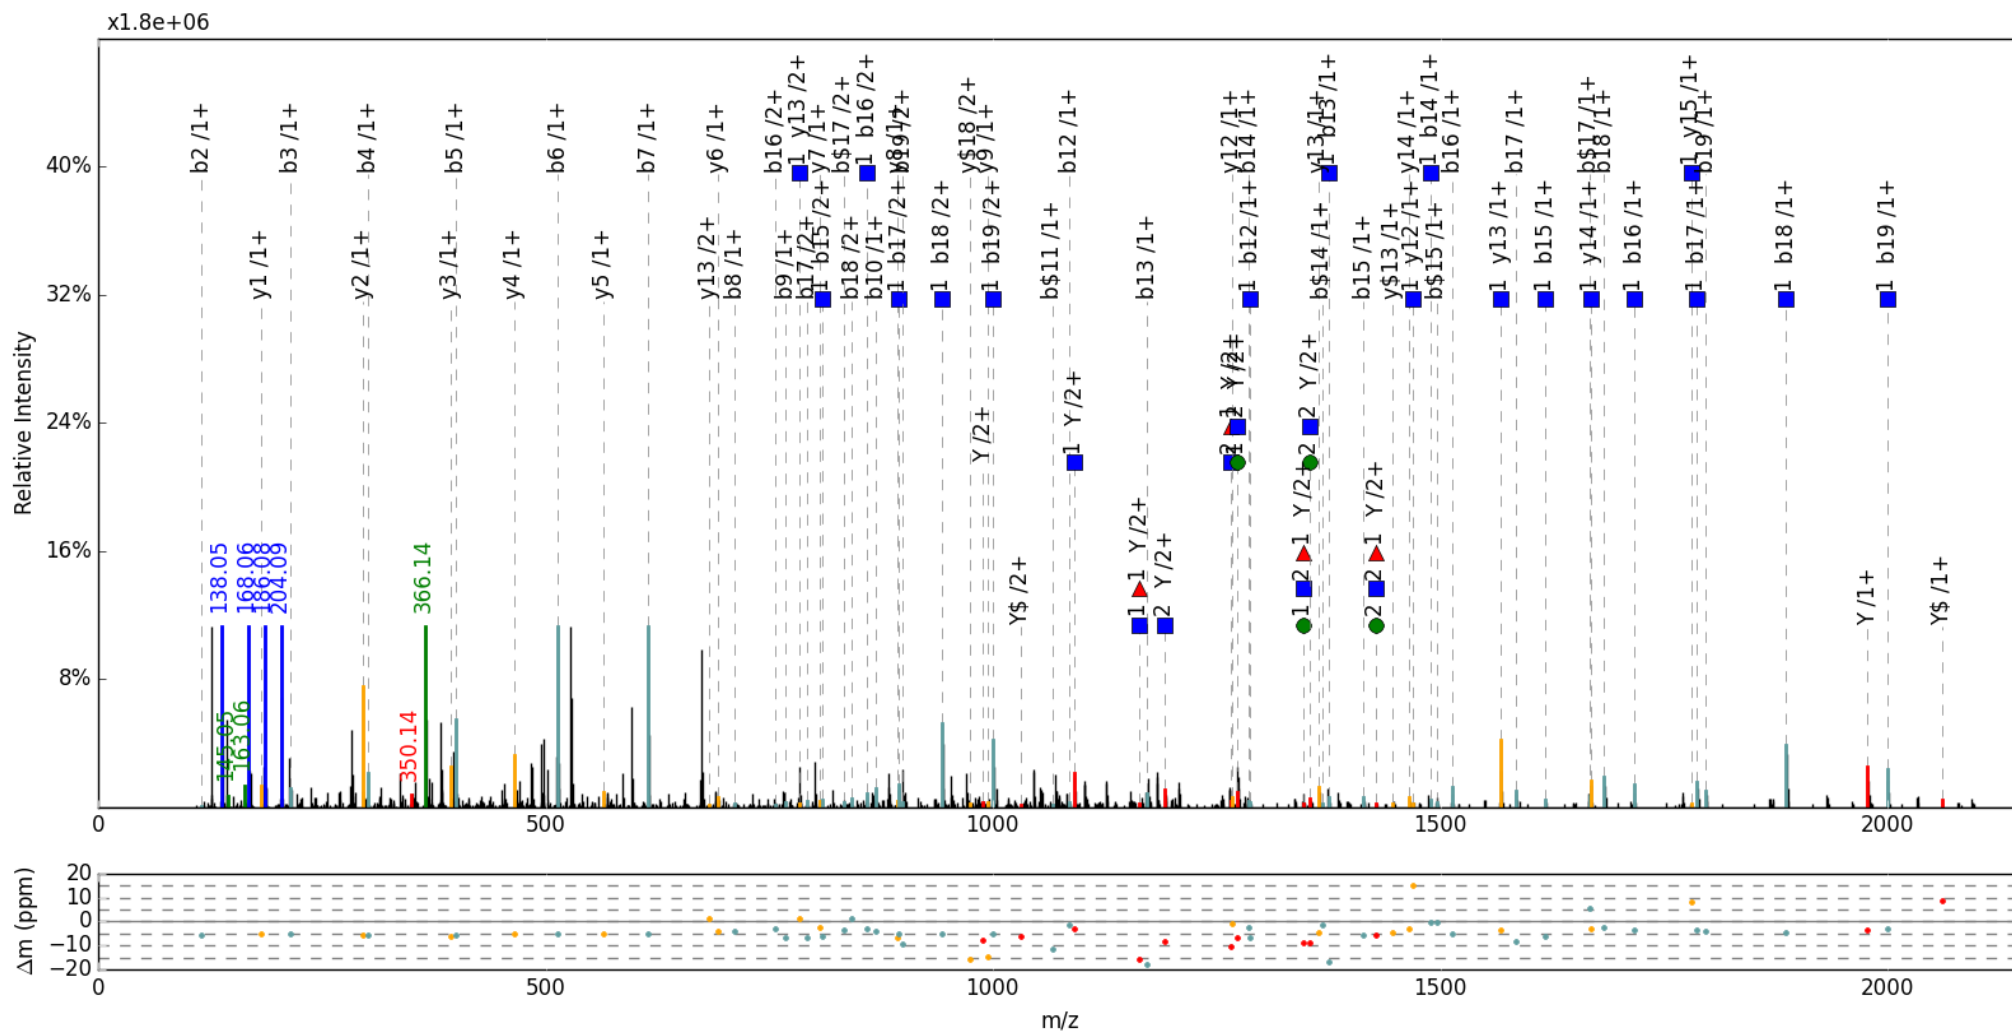

# N616

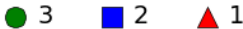

2019 18 17 16 15 14 13 12 11 10 9 8 7 6 5 4 3 2 1

QDVJCTEVPVAIHADQLTPTWR

1 2 3 4 5 6 7 8 9 10 11 13 14 16 20

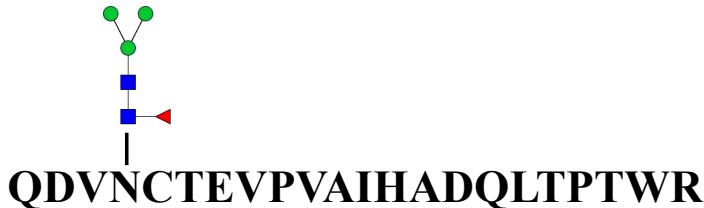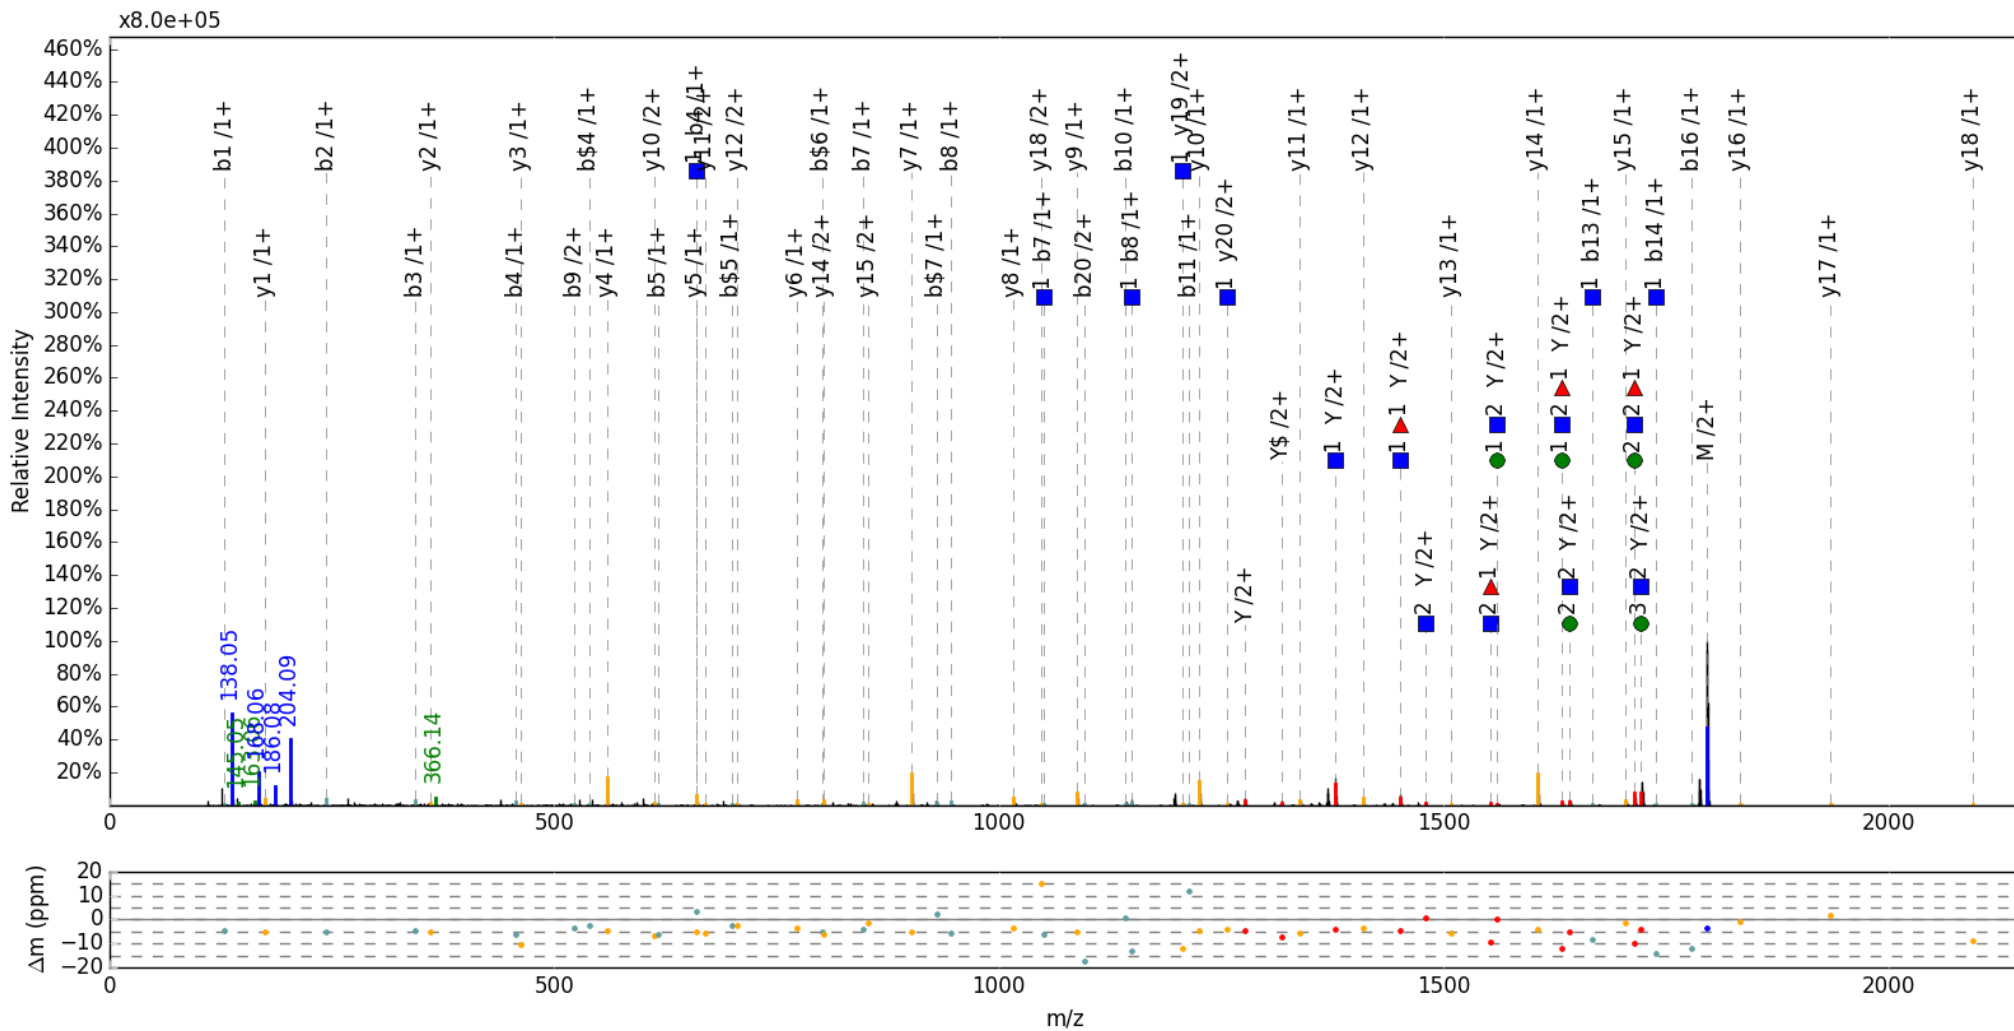

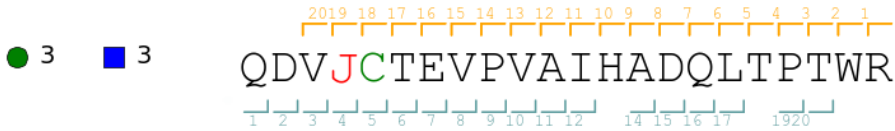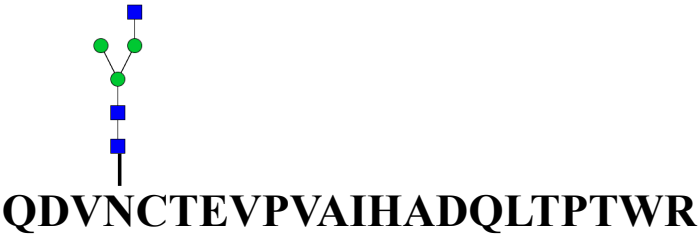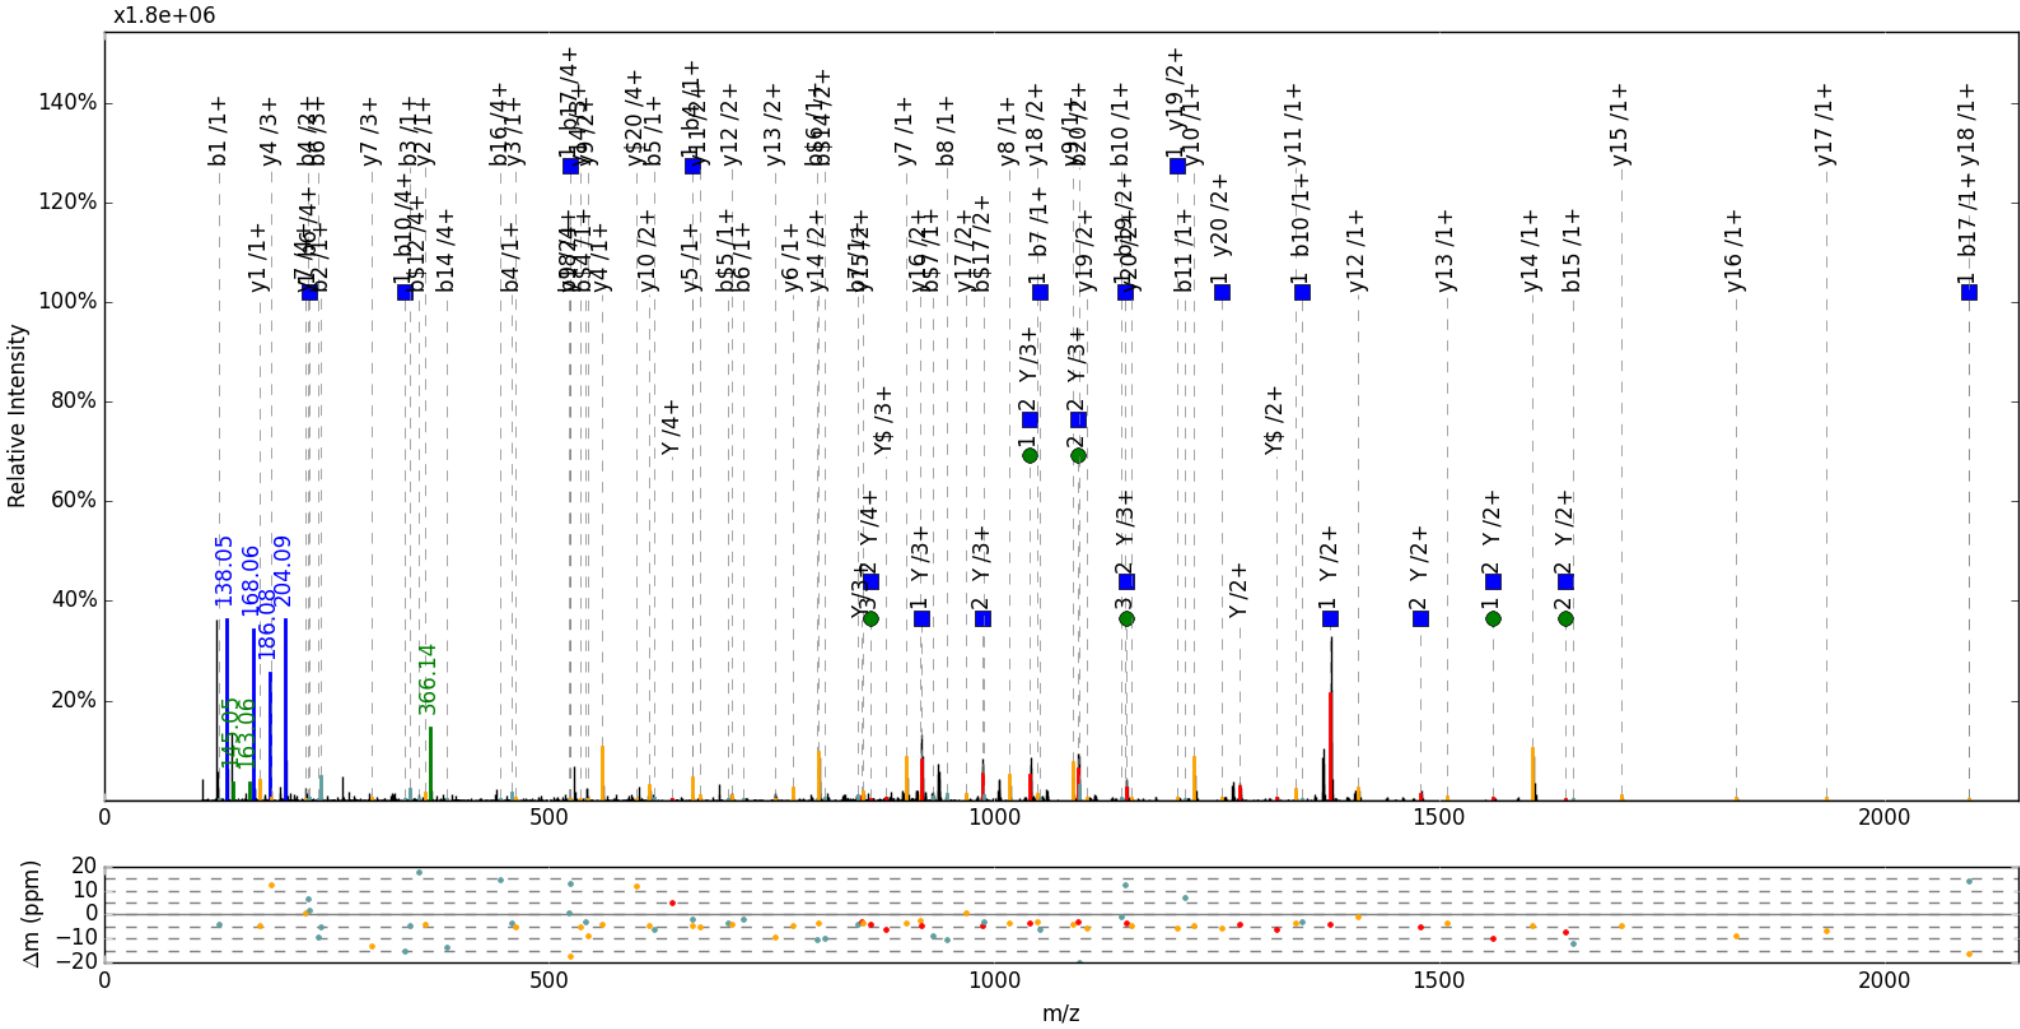

N657

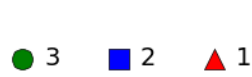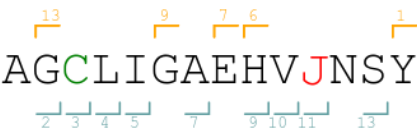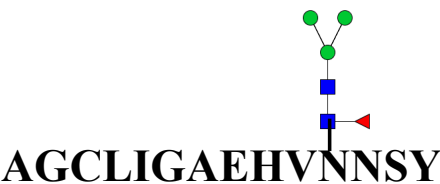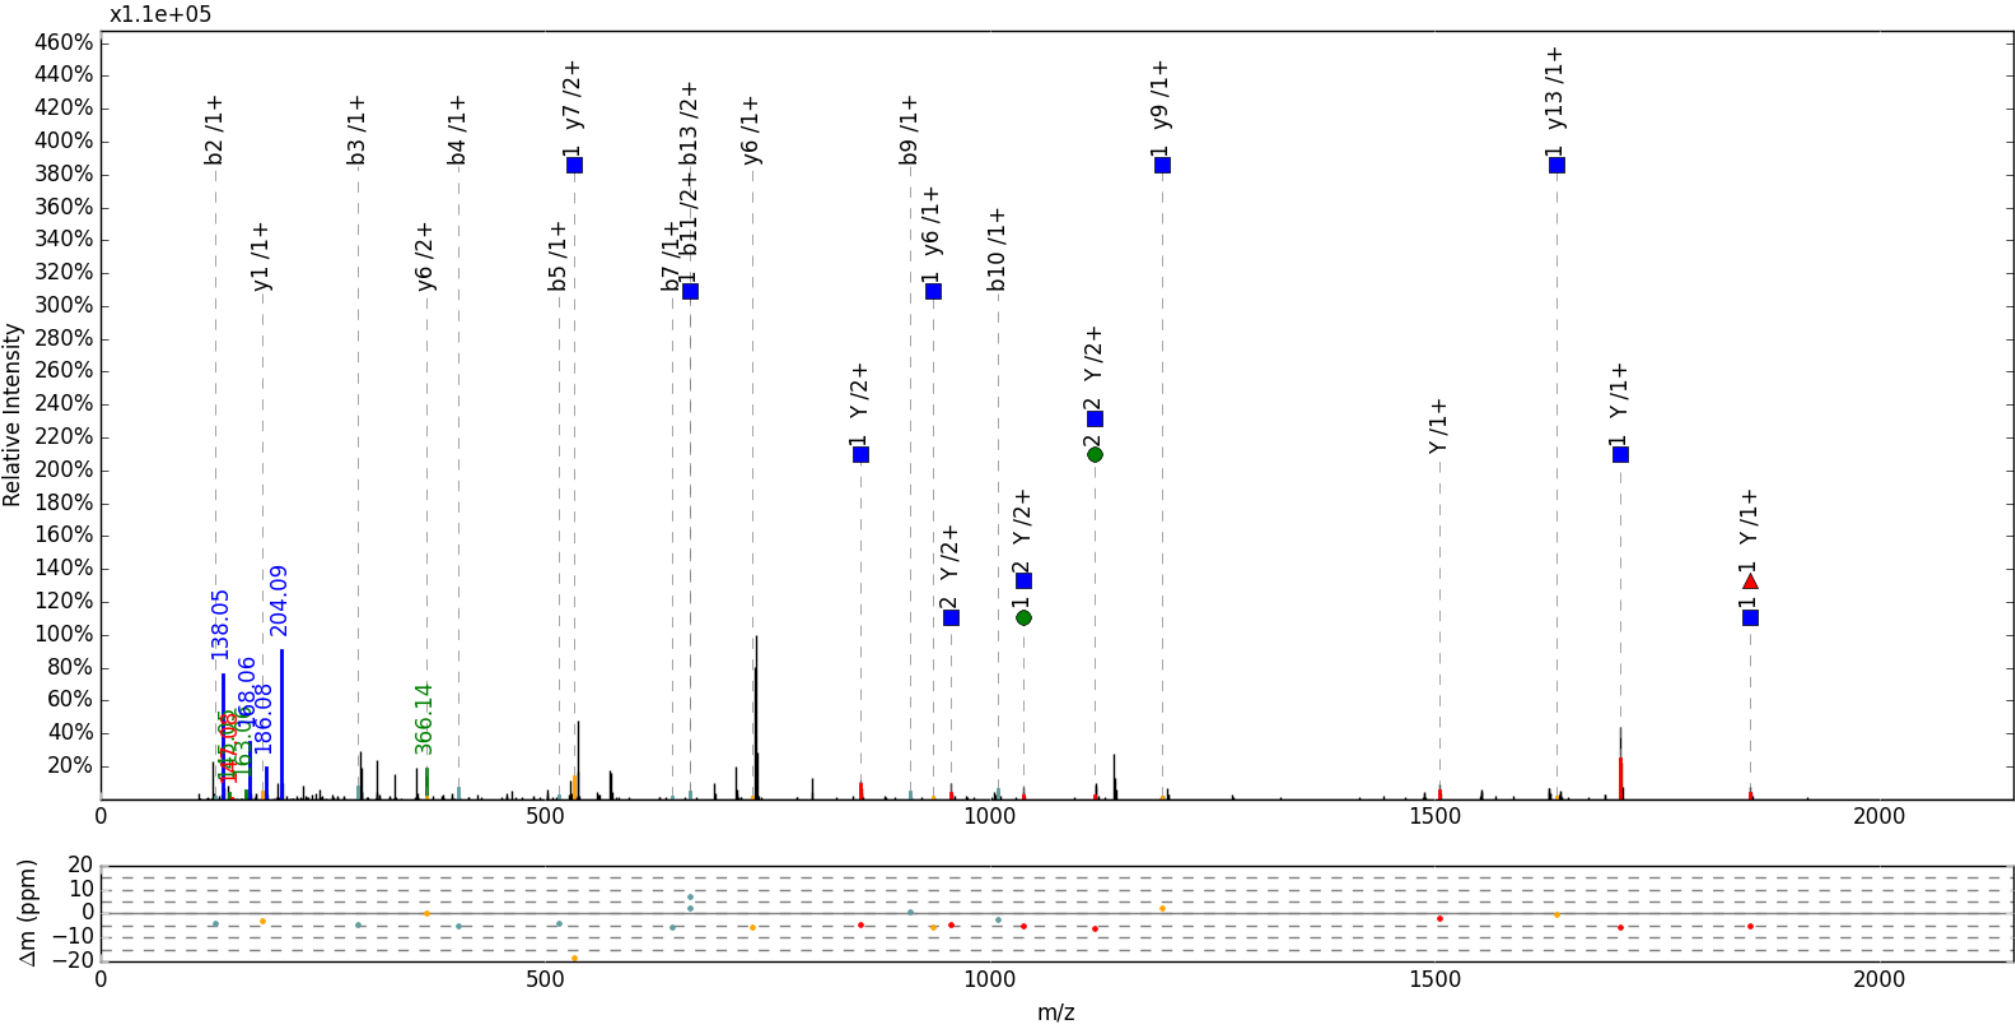

## N709 &amp; N717

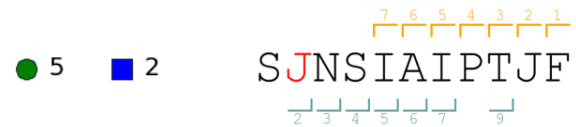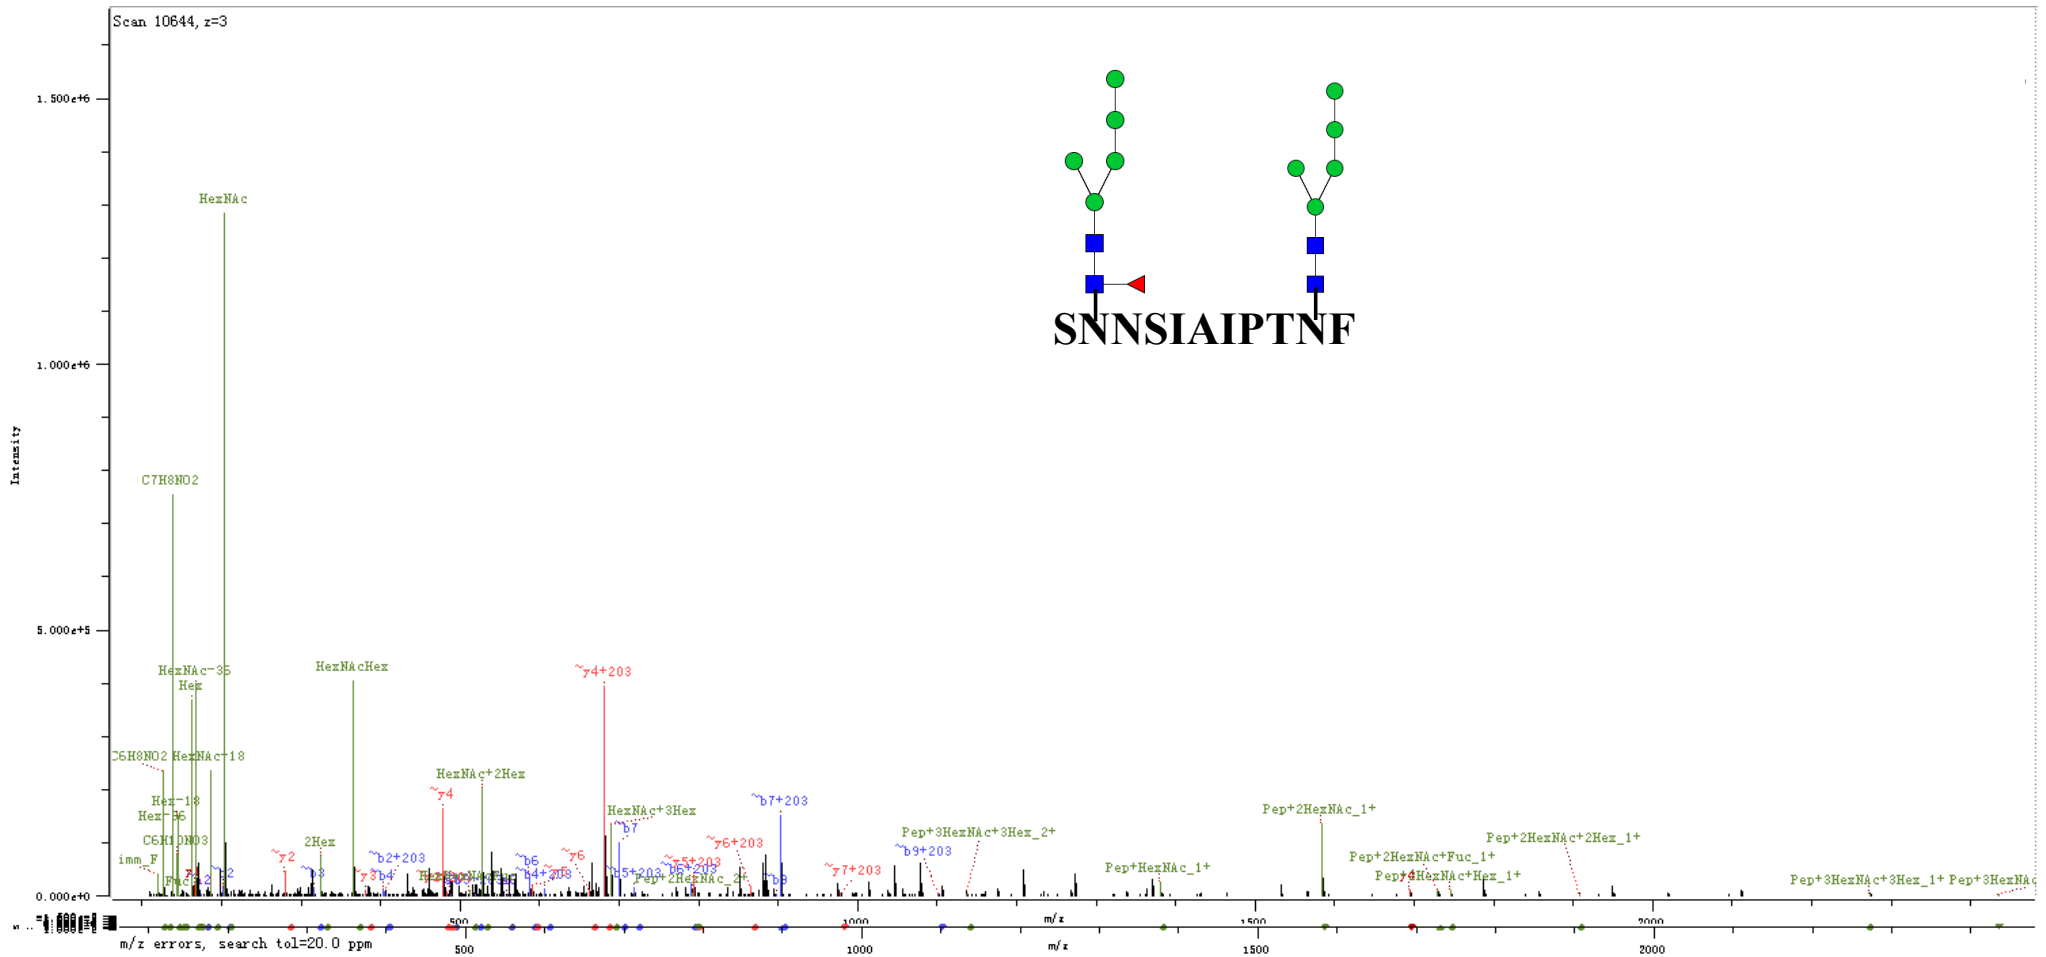

N801

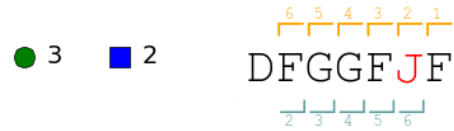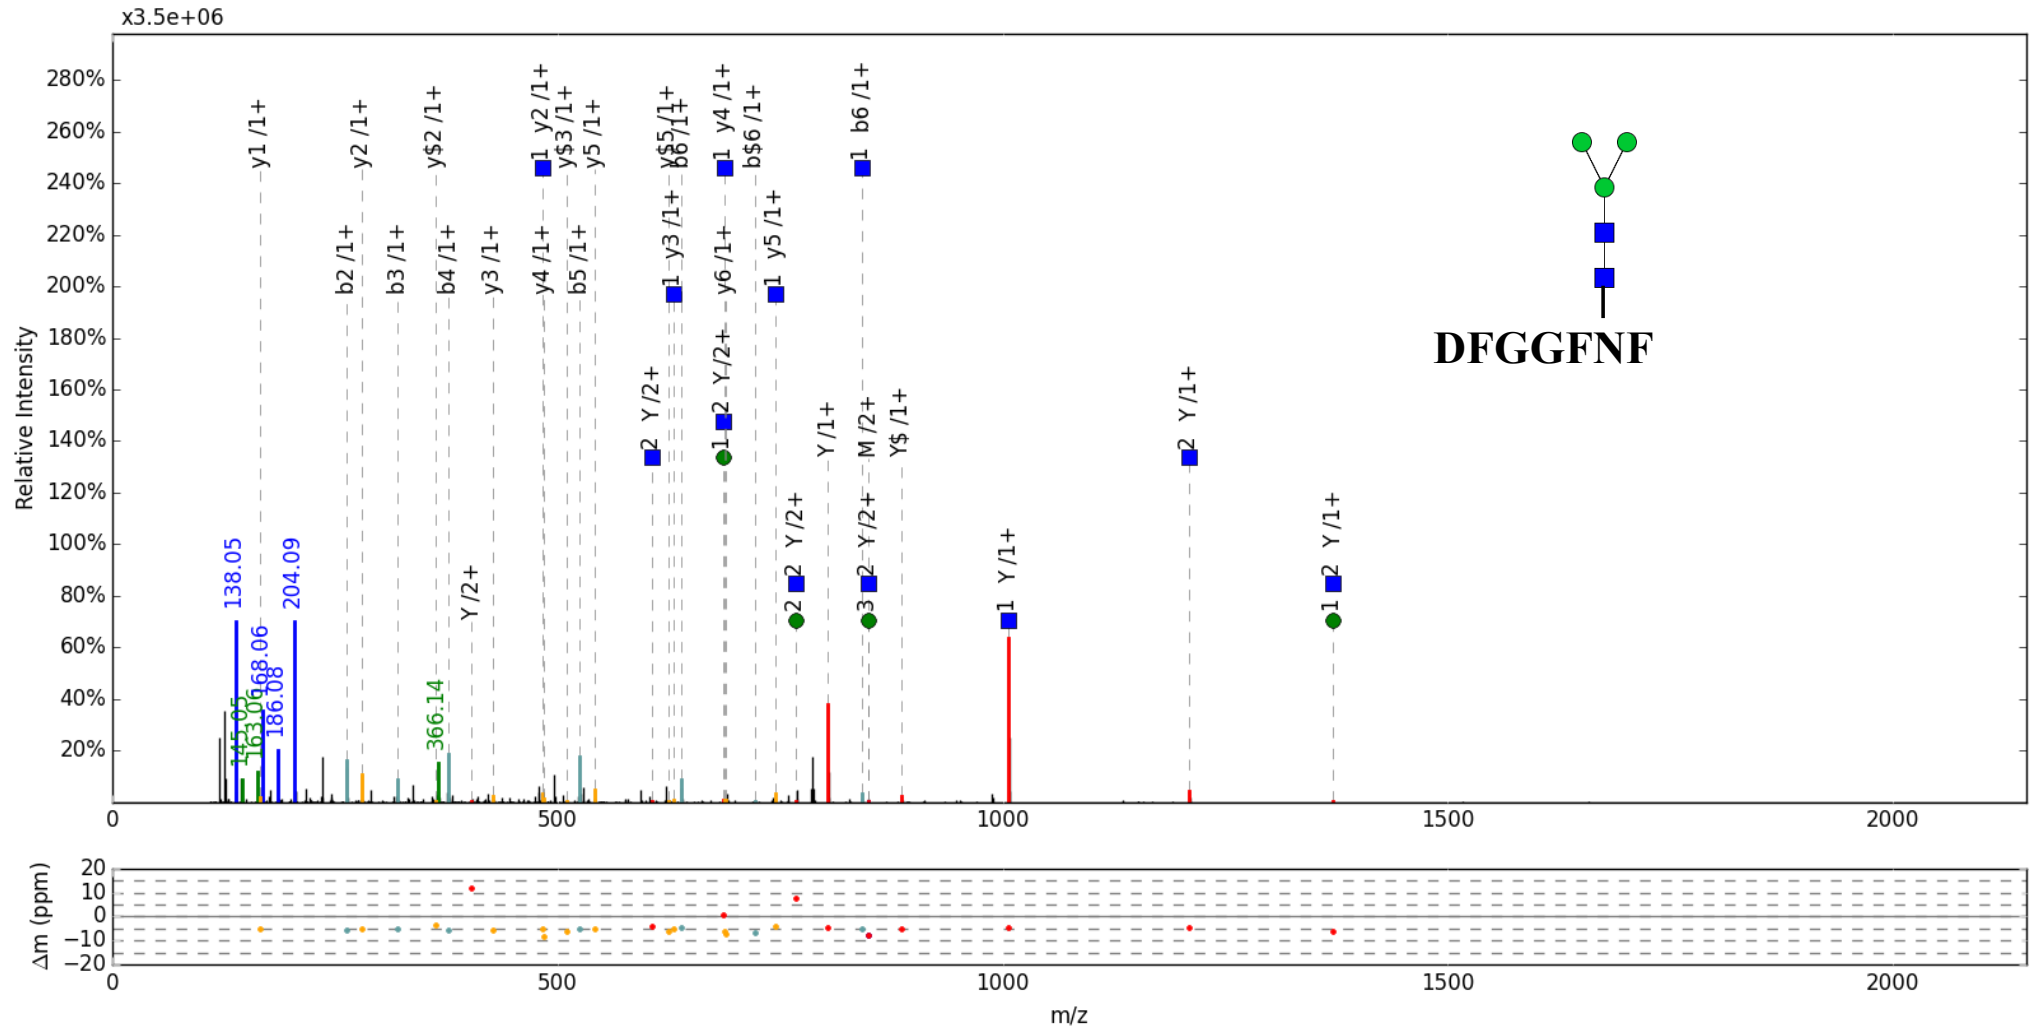

N801

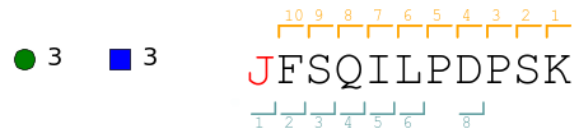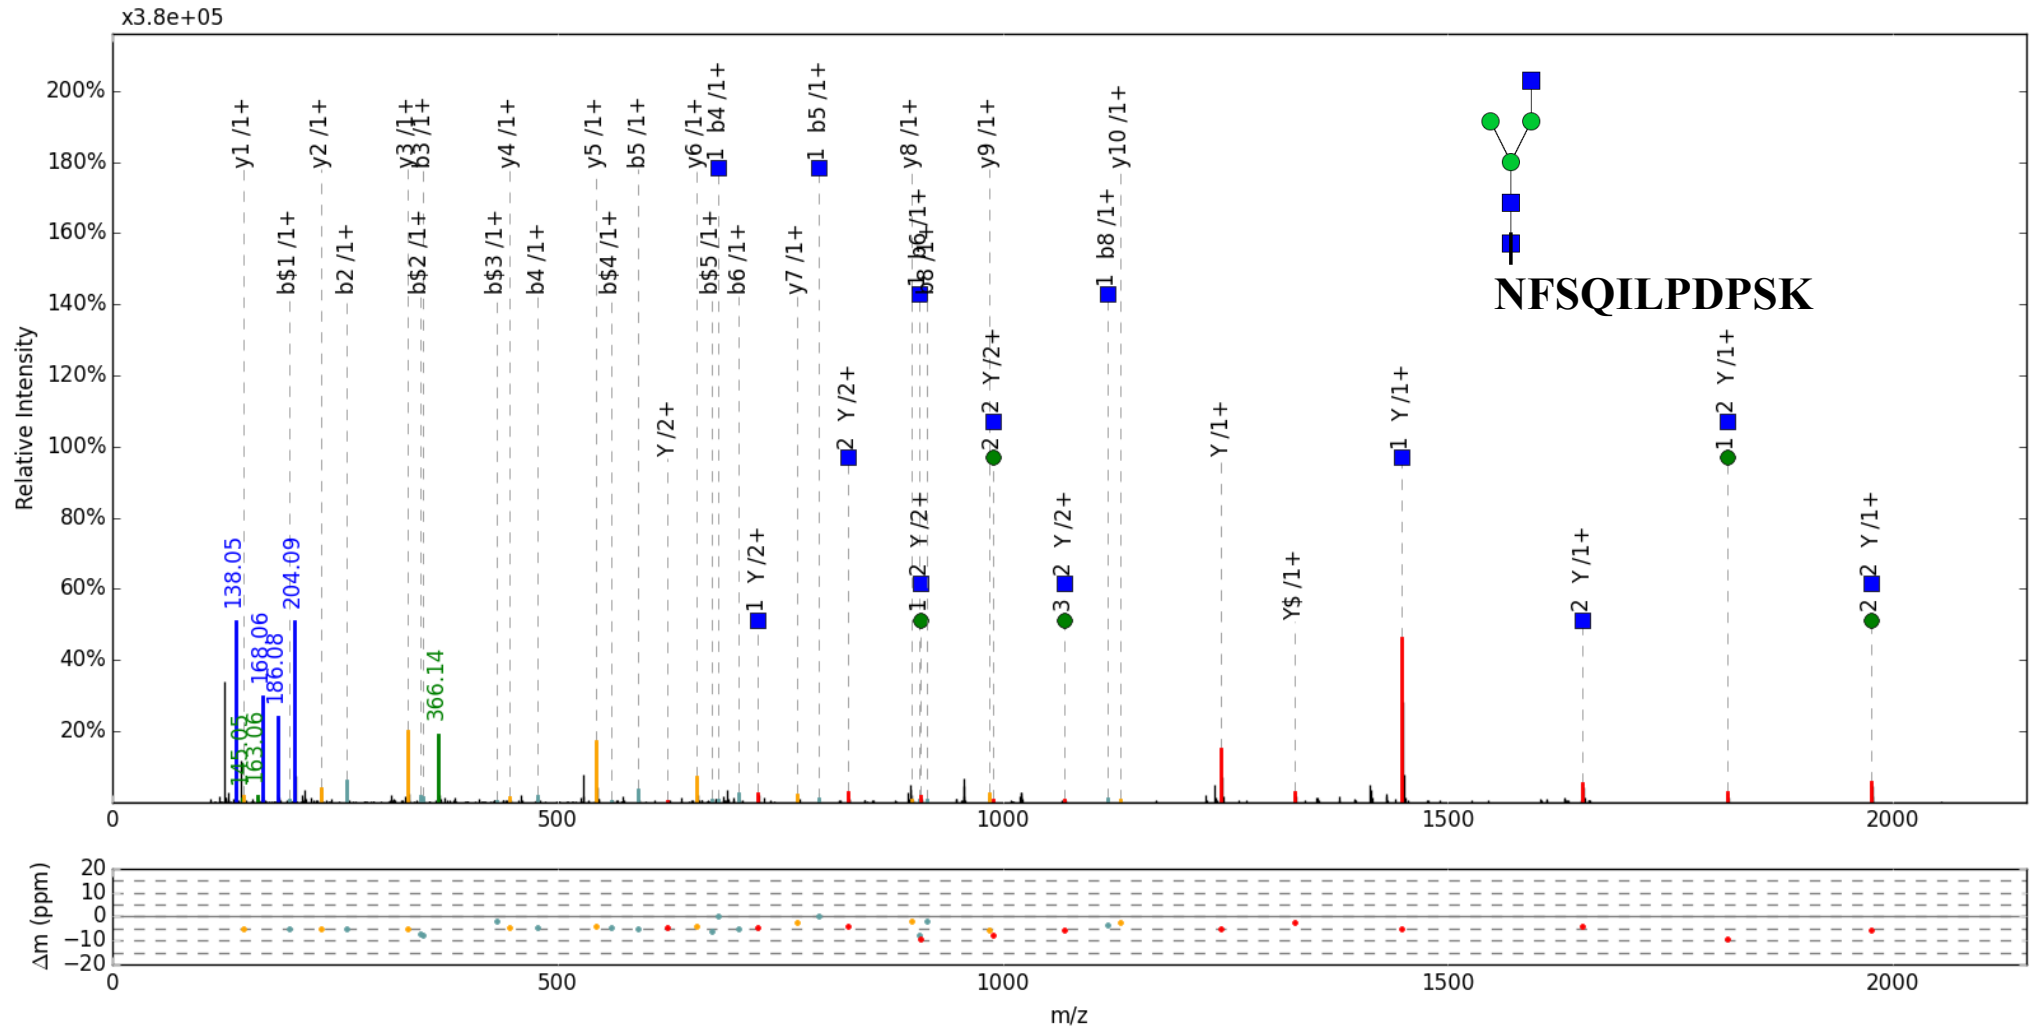



N1074

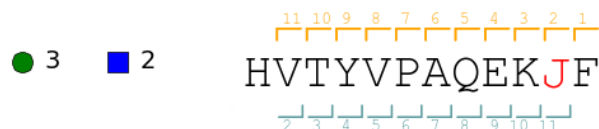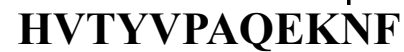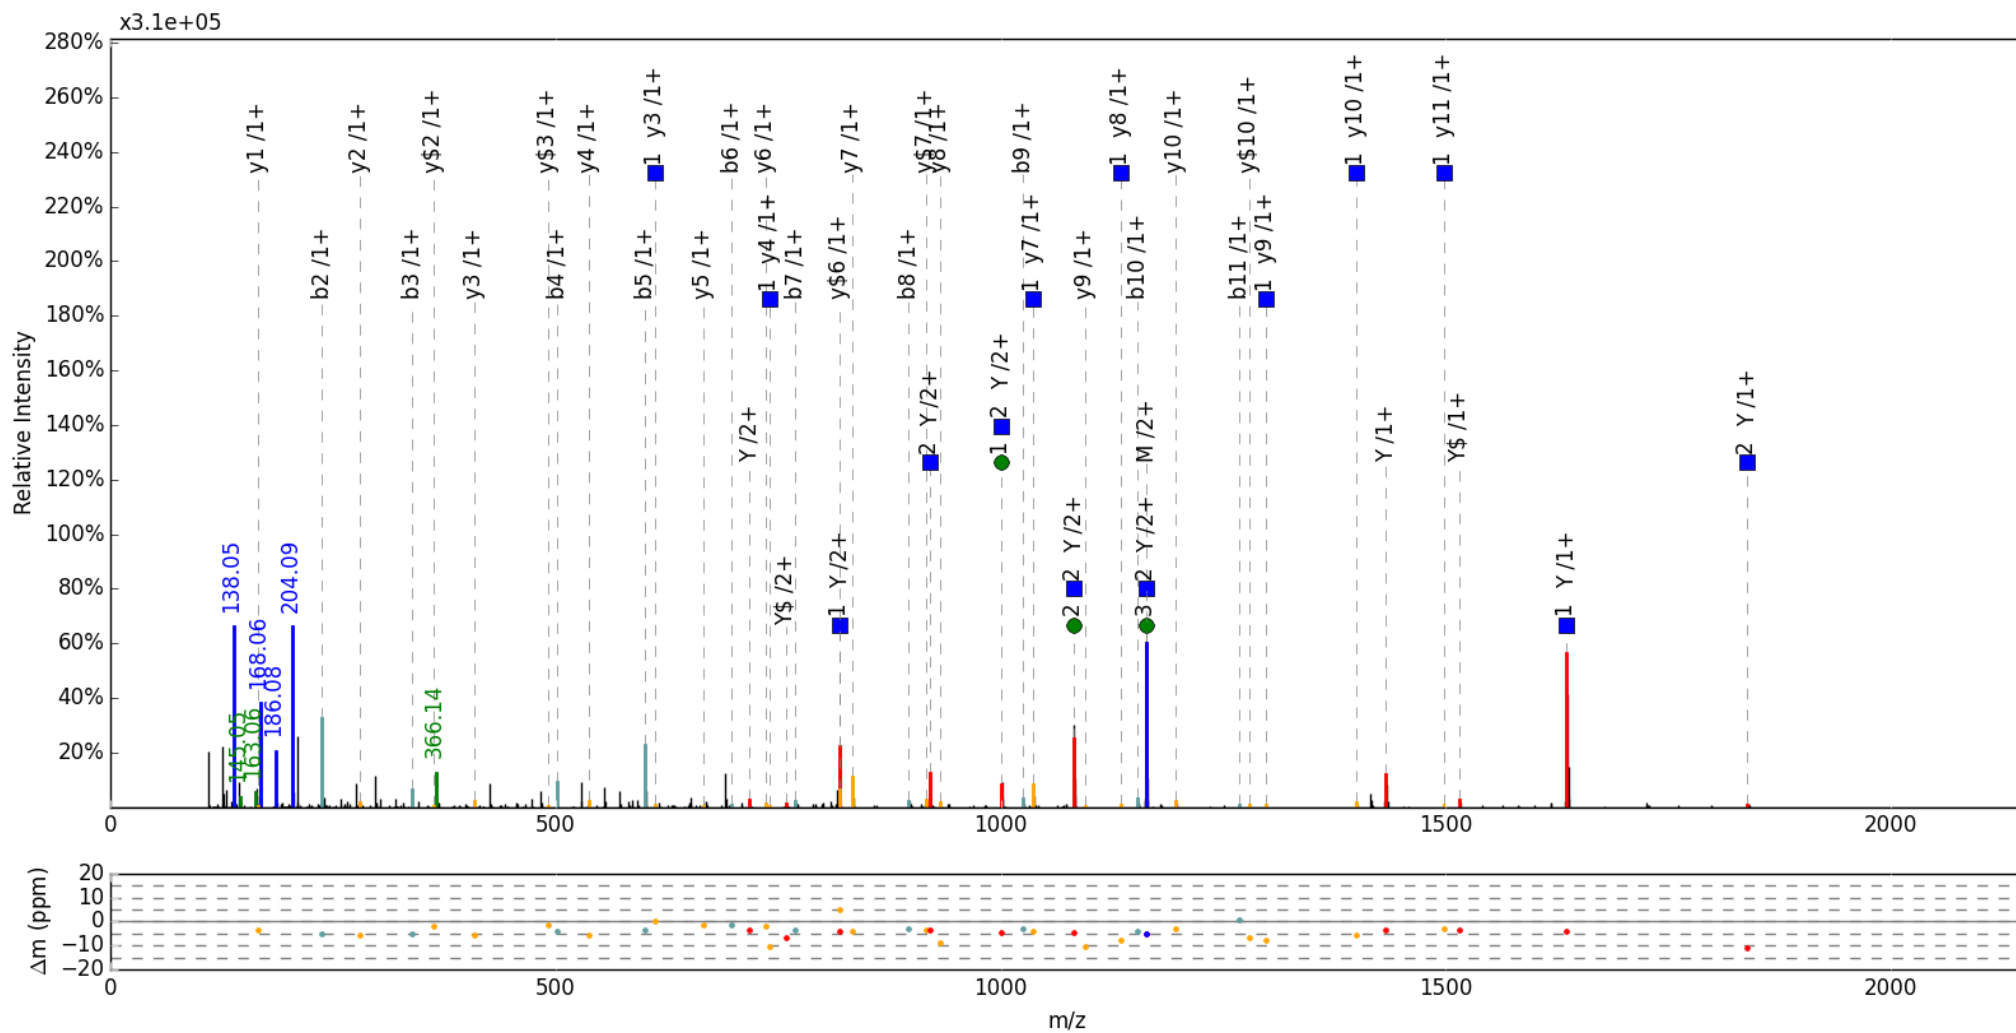

N1074

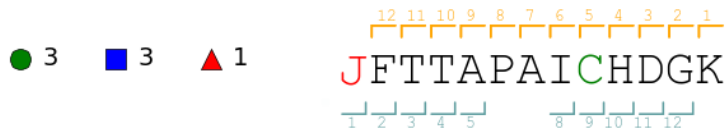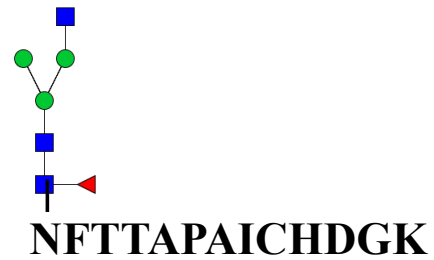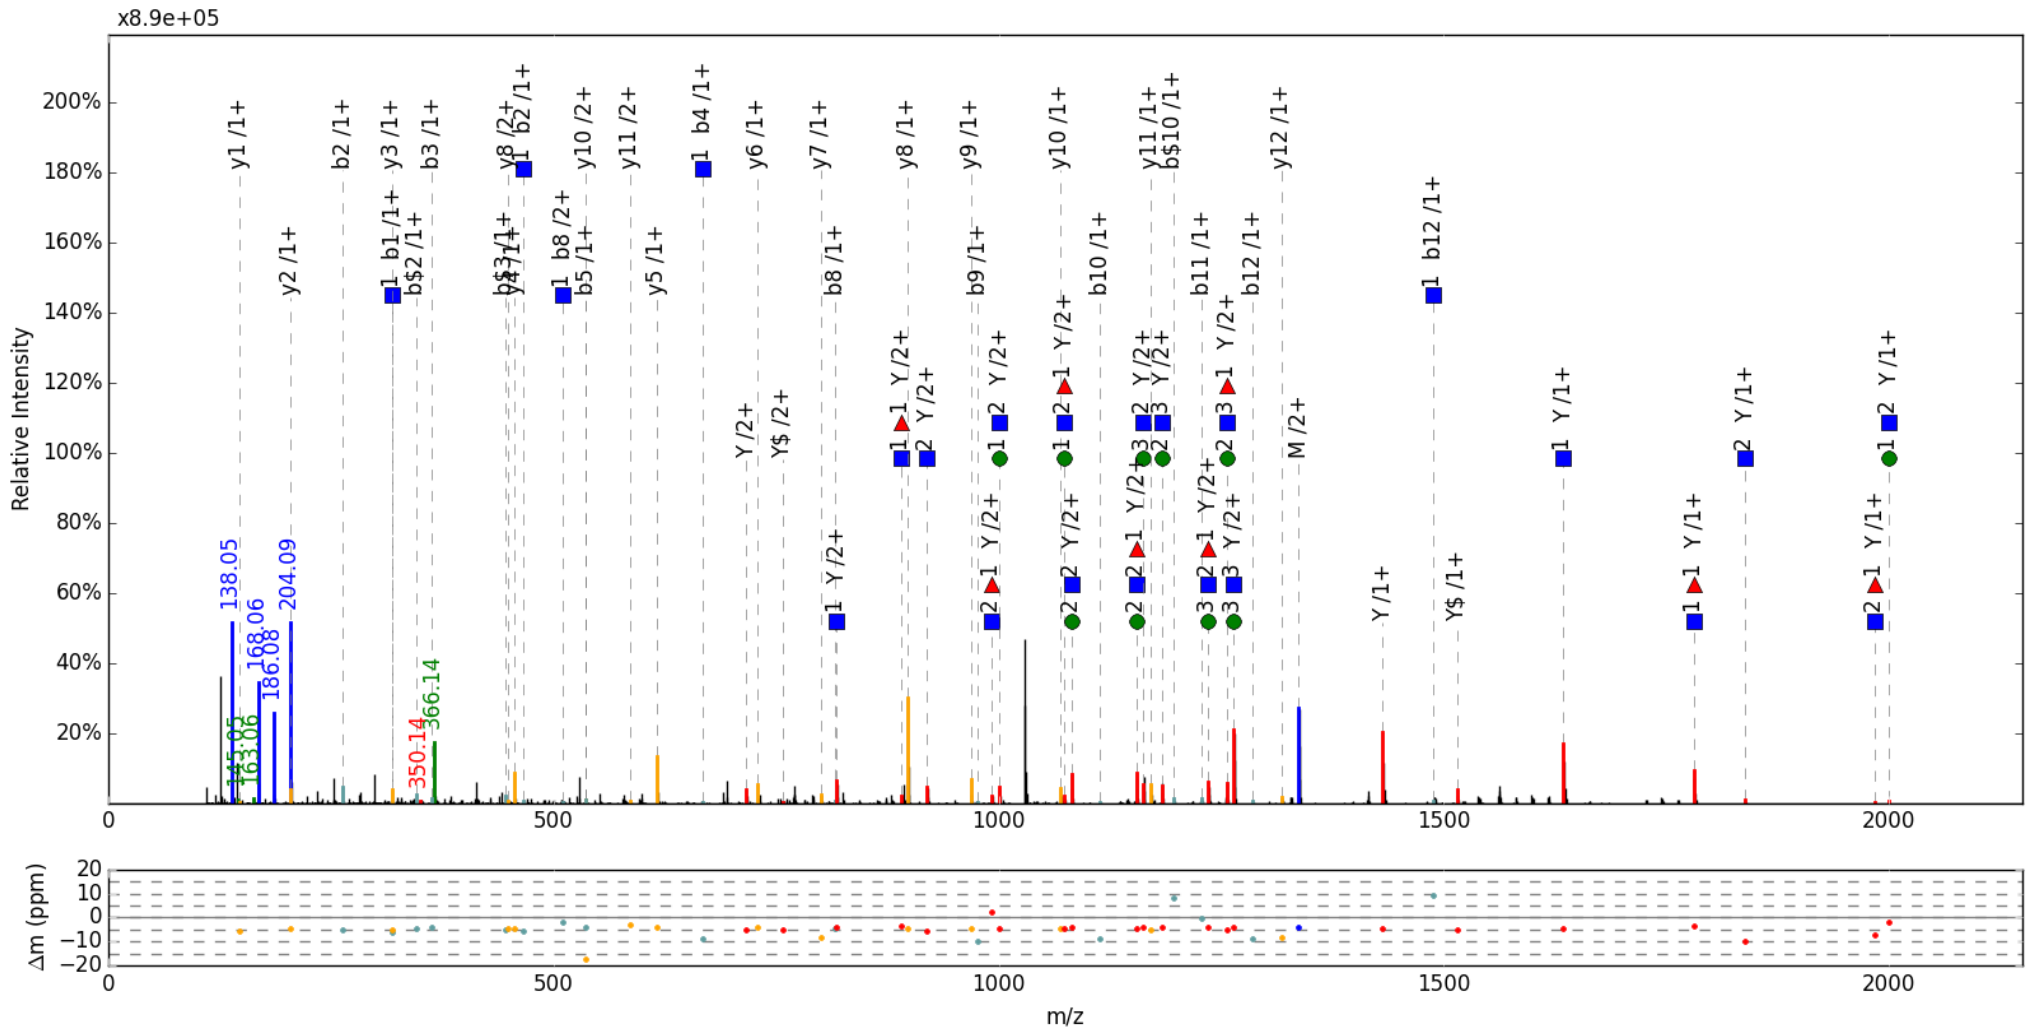

N1074

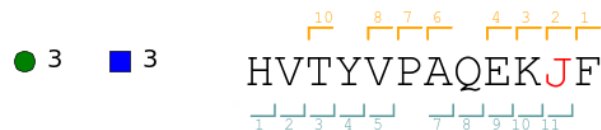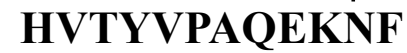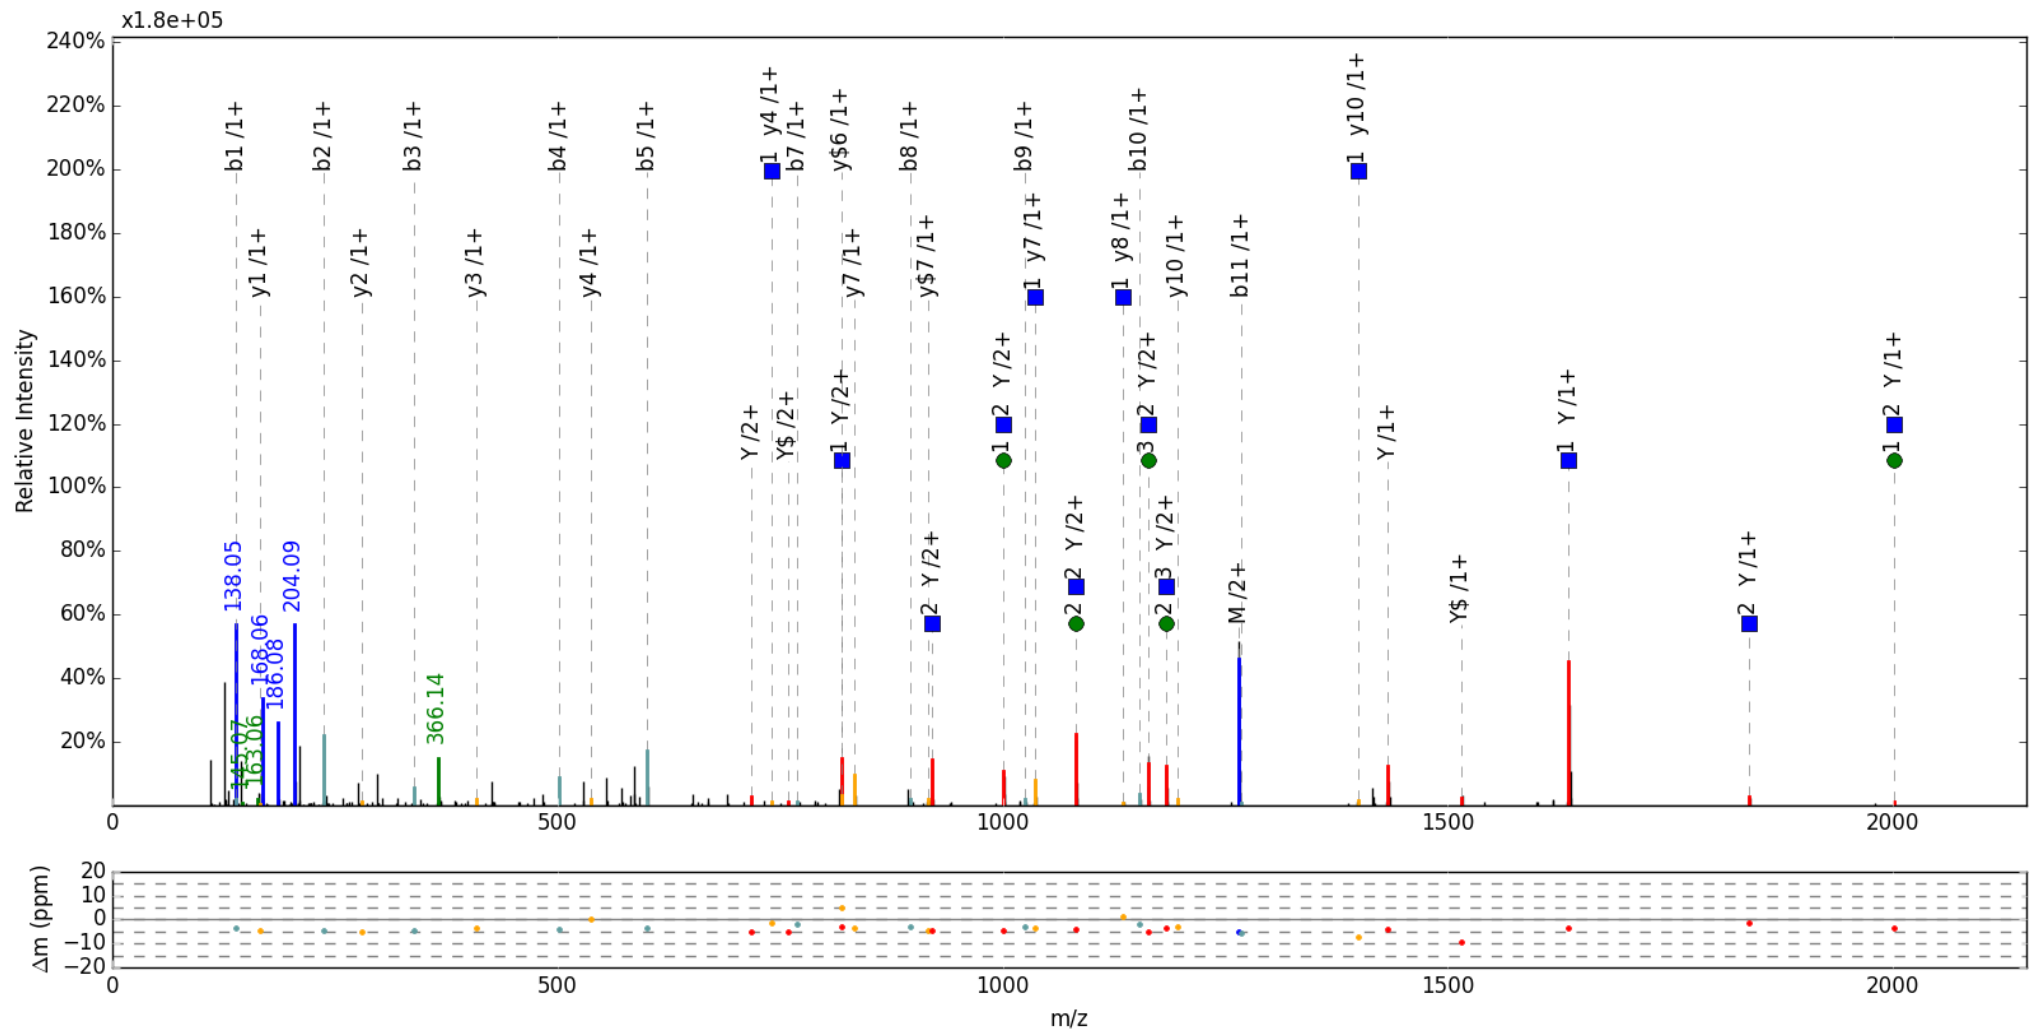

N1098

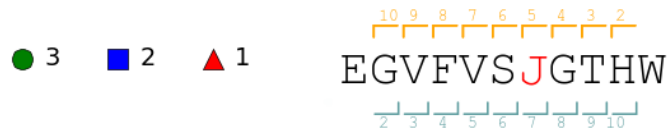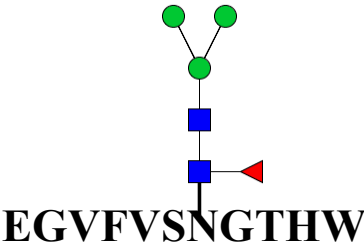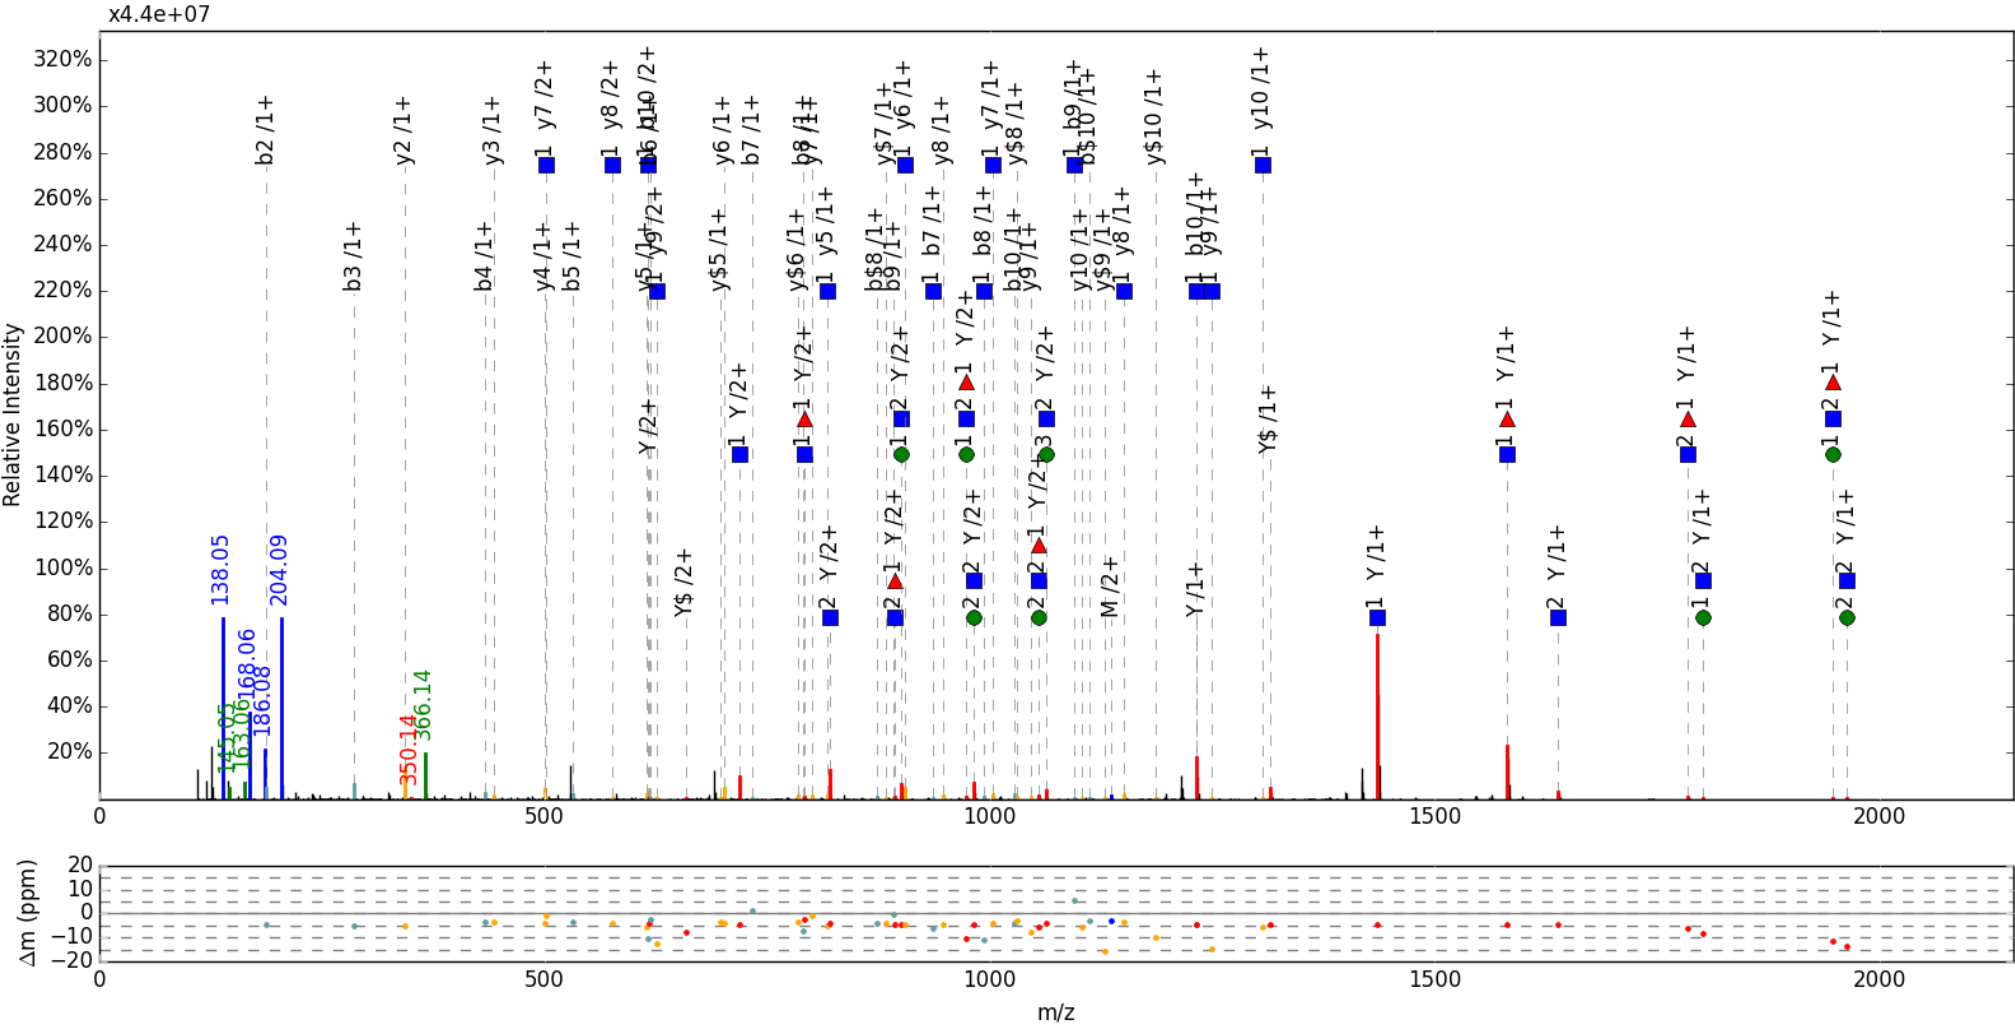

N1098

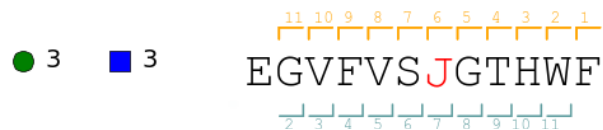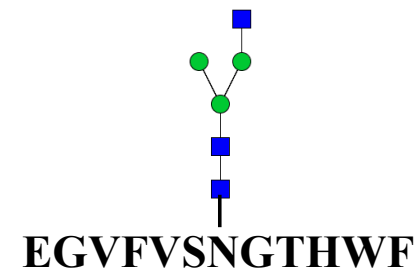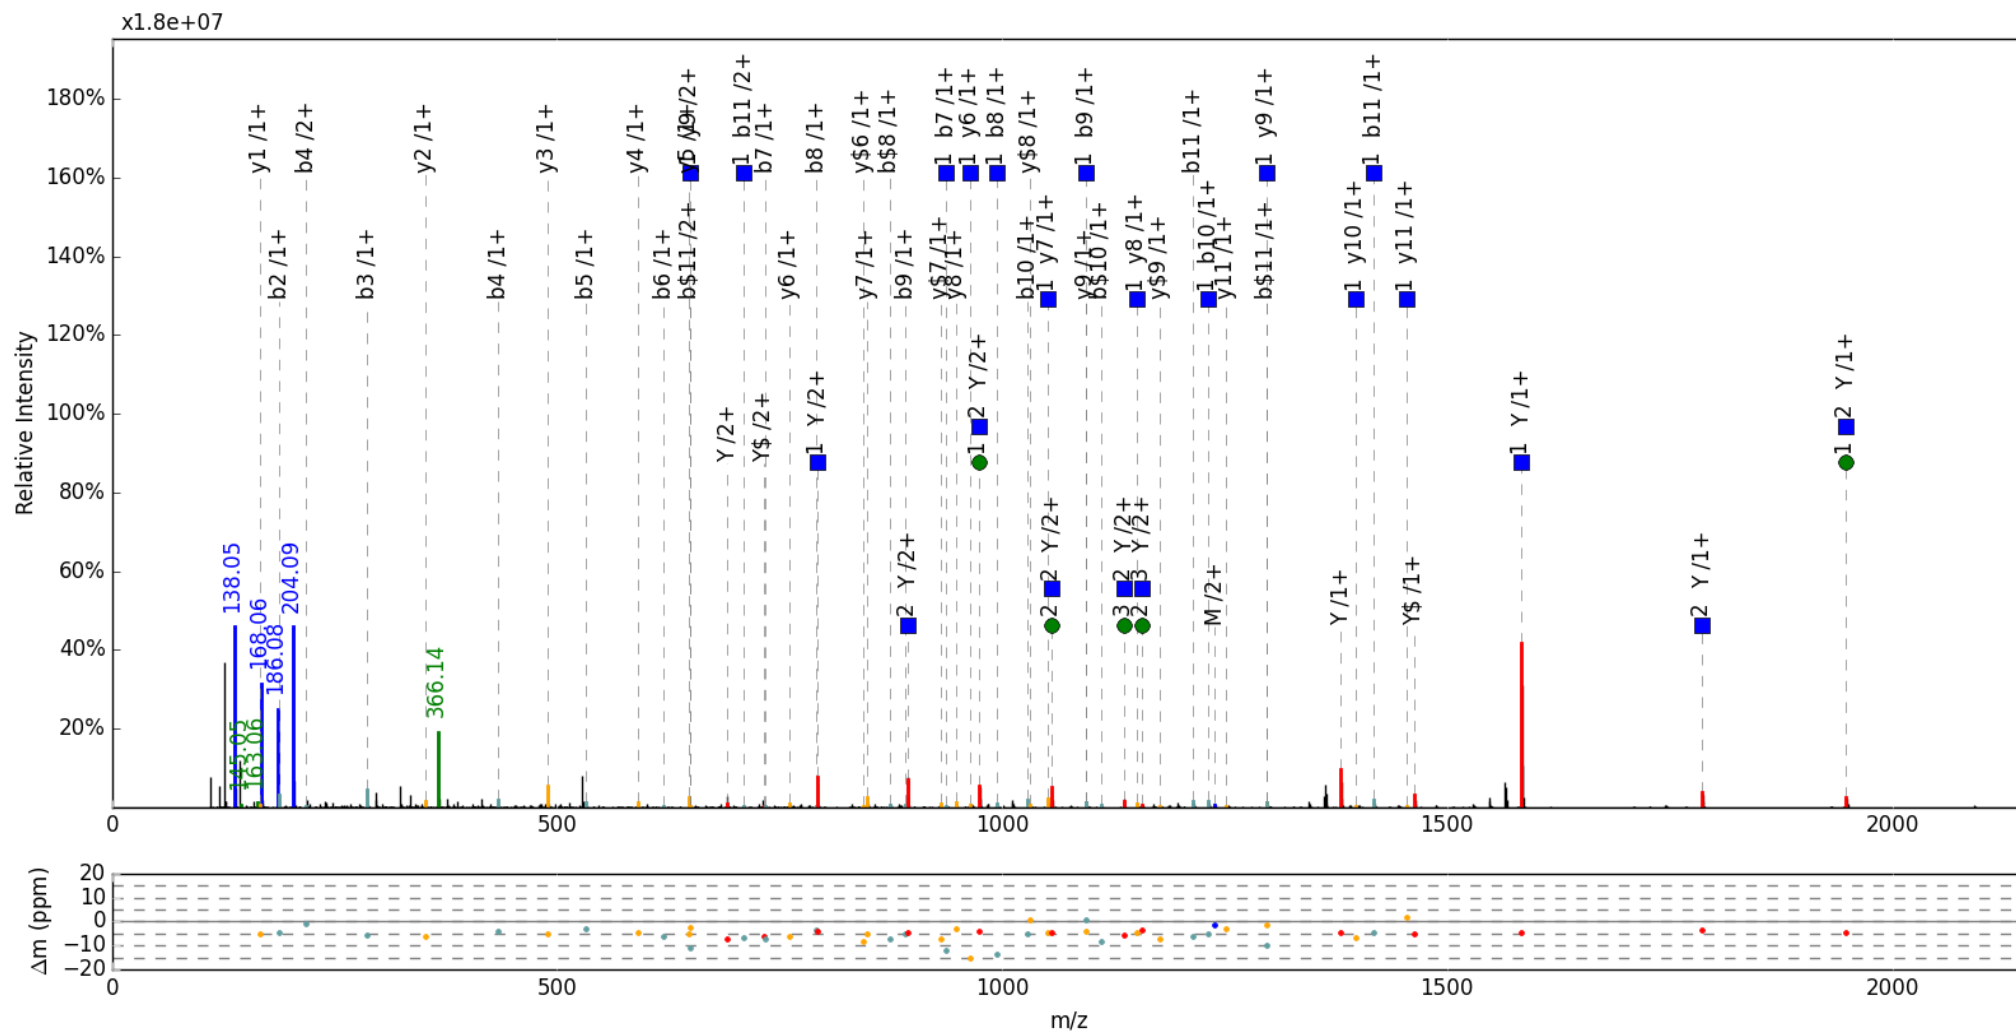

N1134

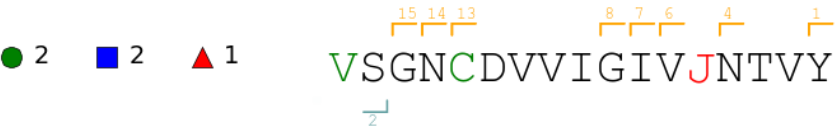

VSGNCDVVIGIVNNTVY

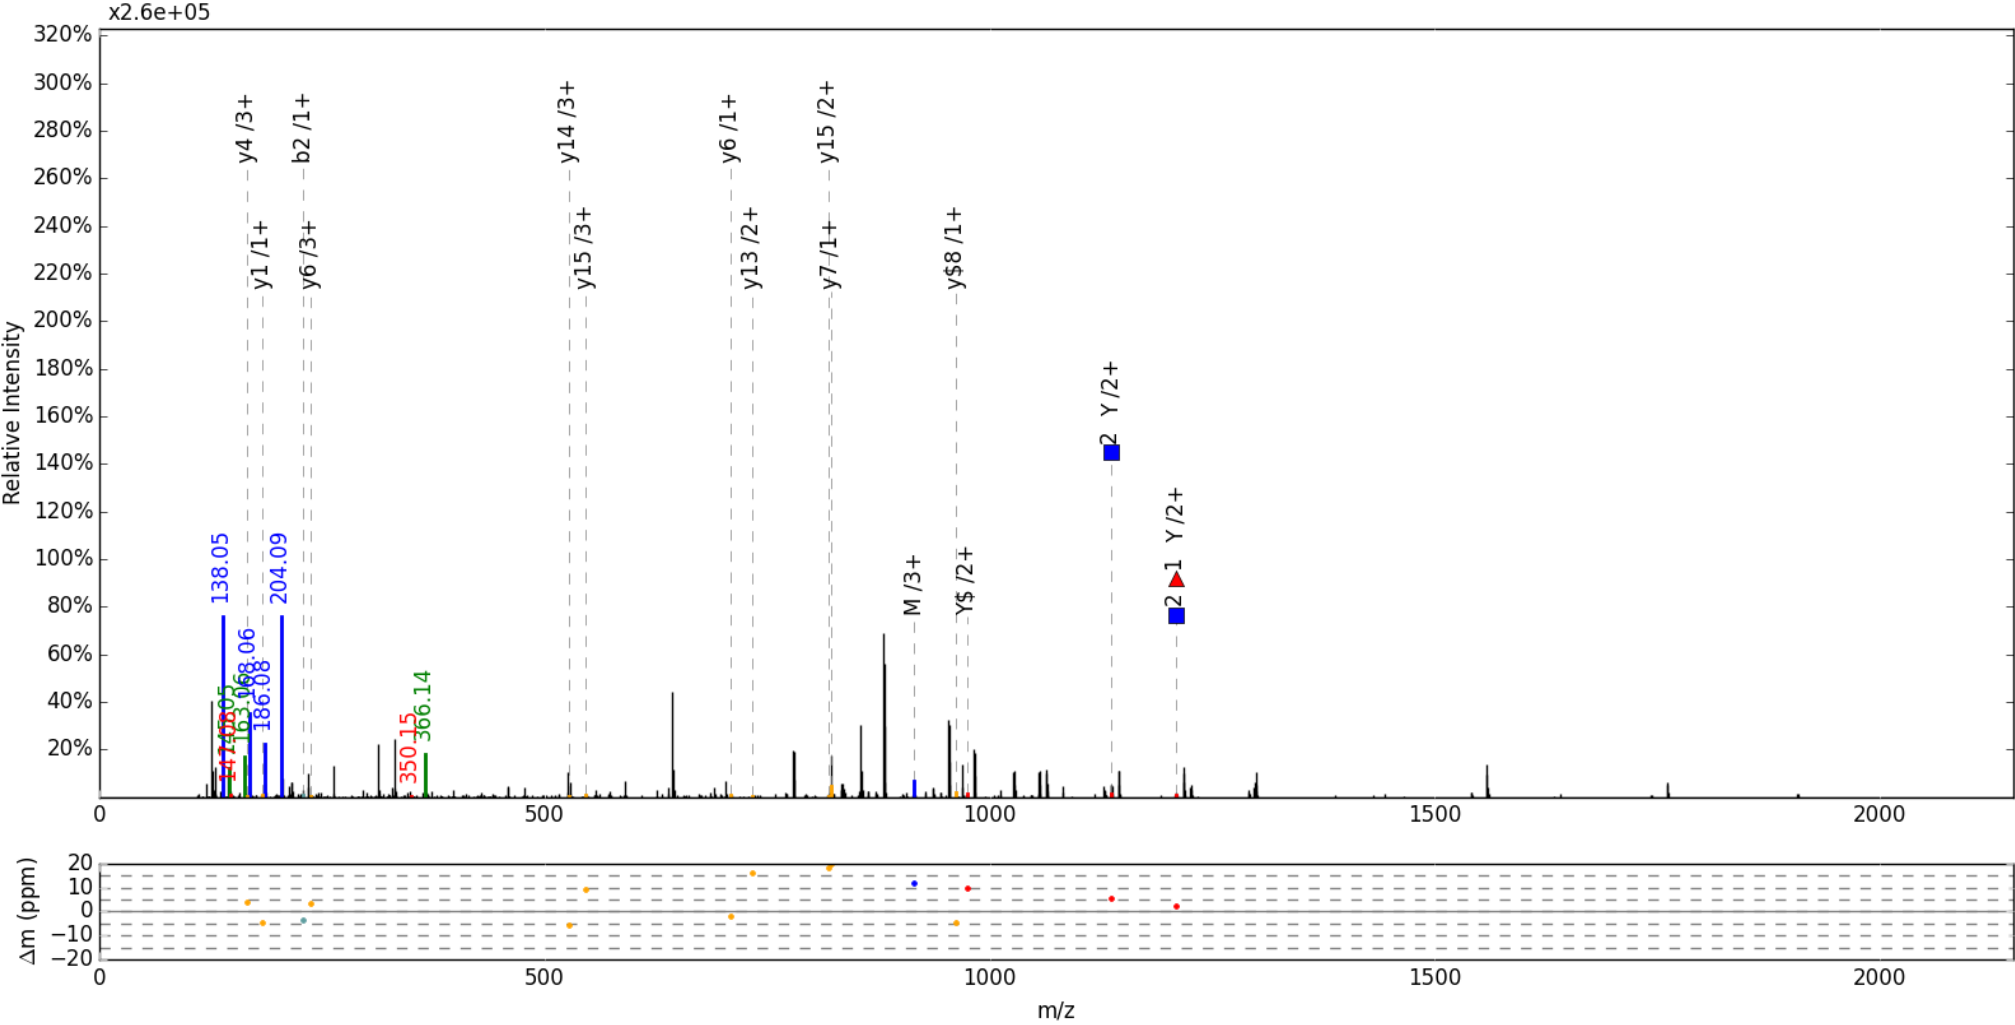

N1158

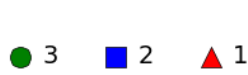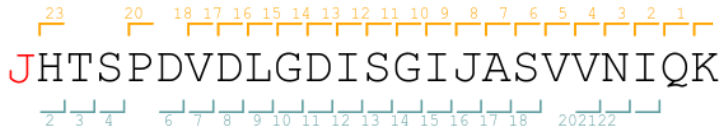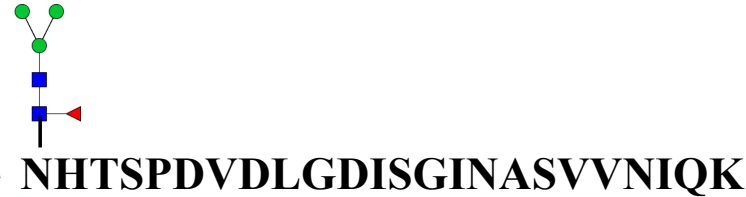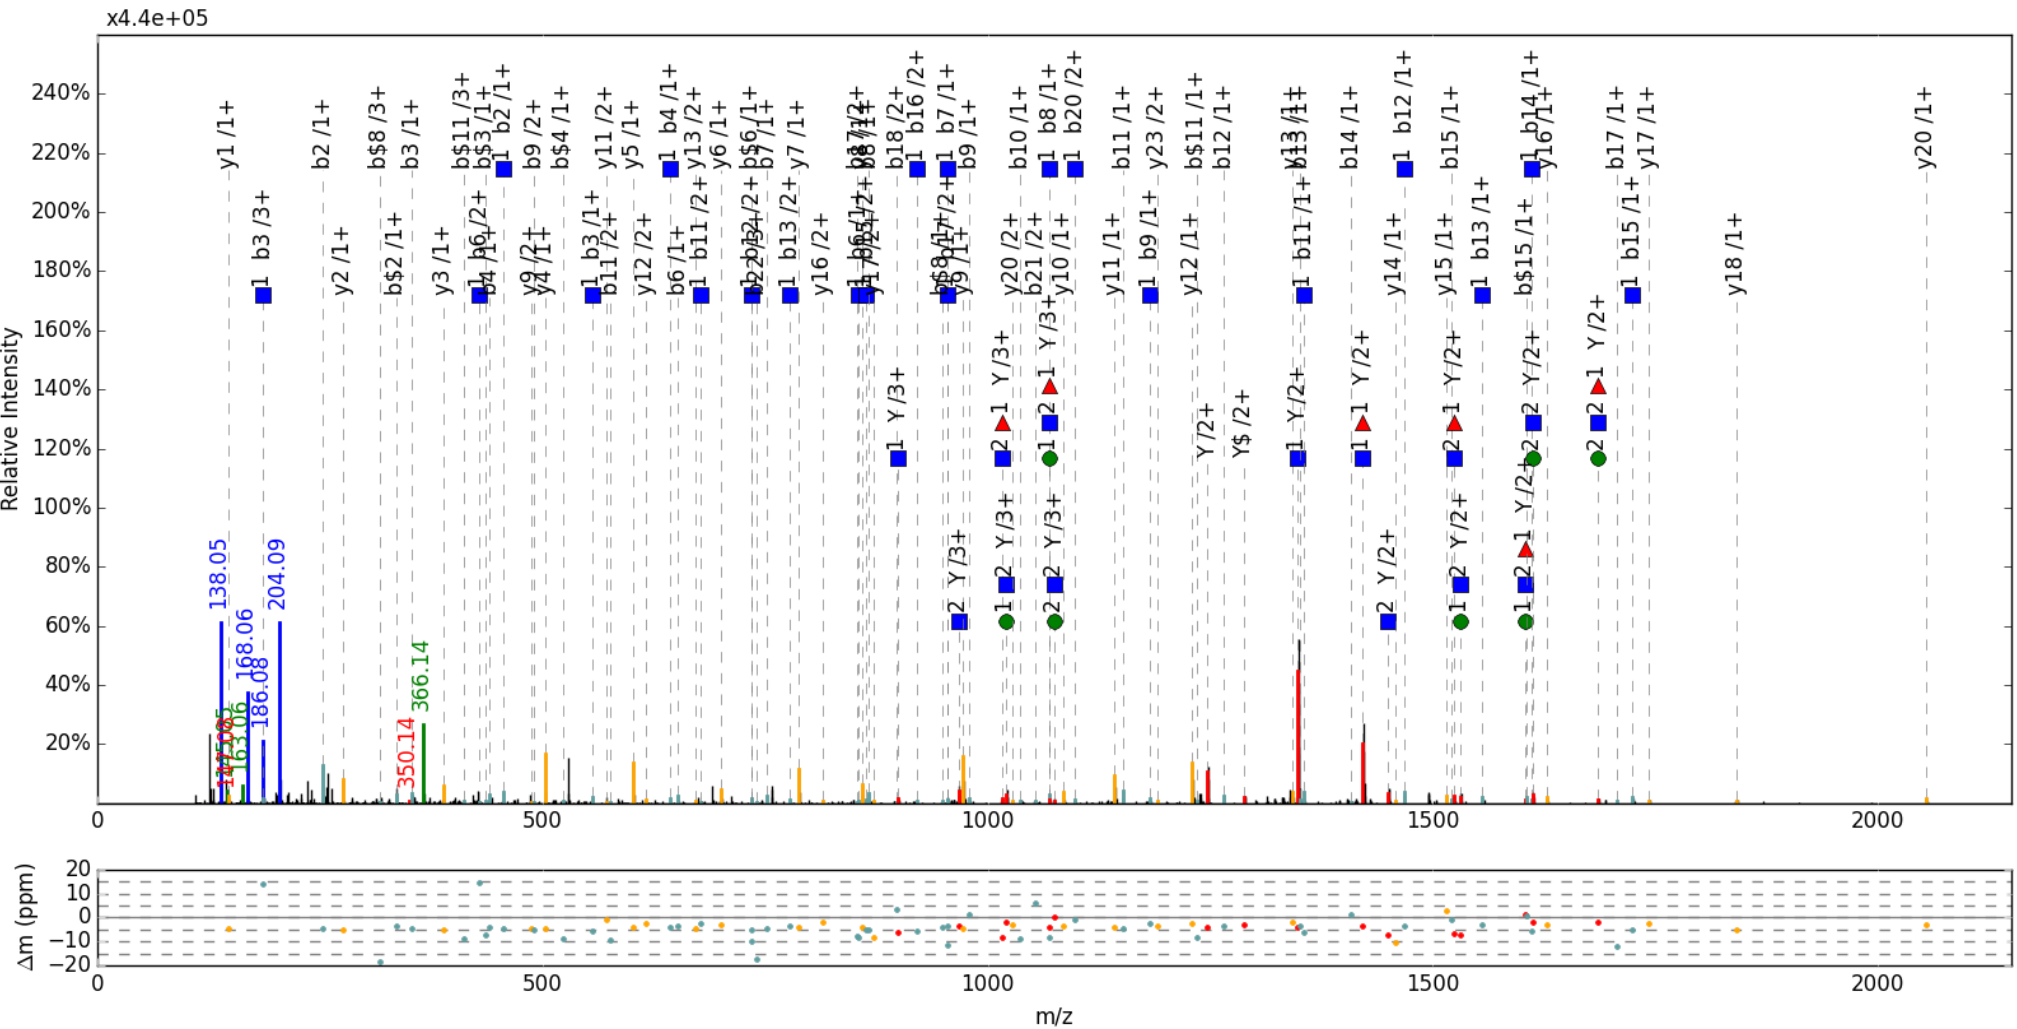

N1173

● 3    ■ 2    ▲ 1

JHTSPDVLGDISGIJASVVNIQK NHTSPDVLGDISGINASVVNIQK

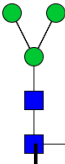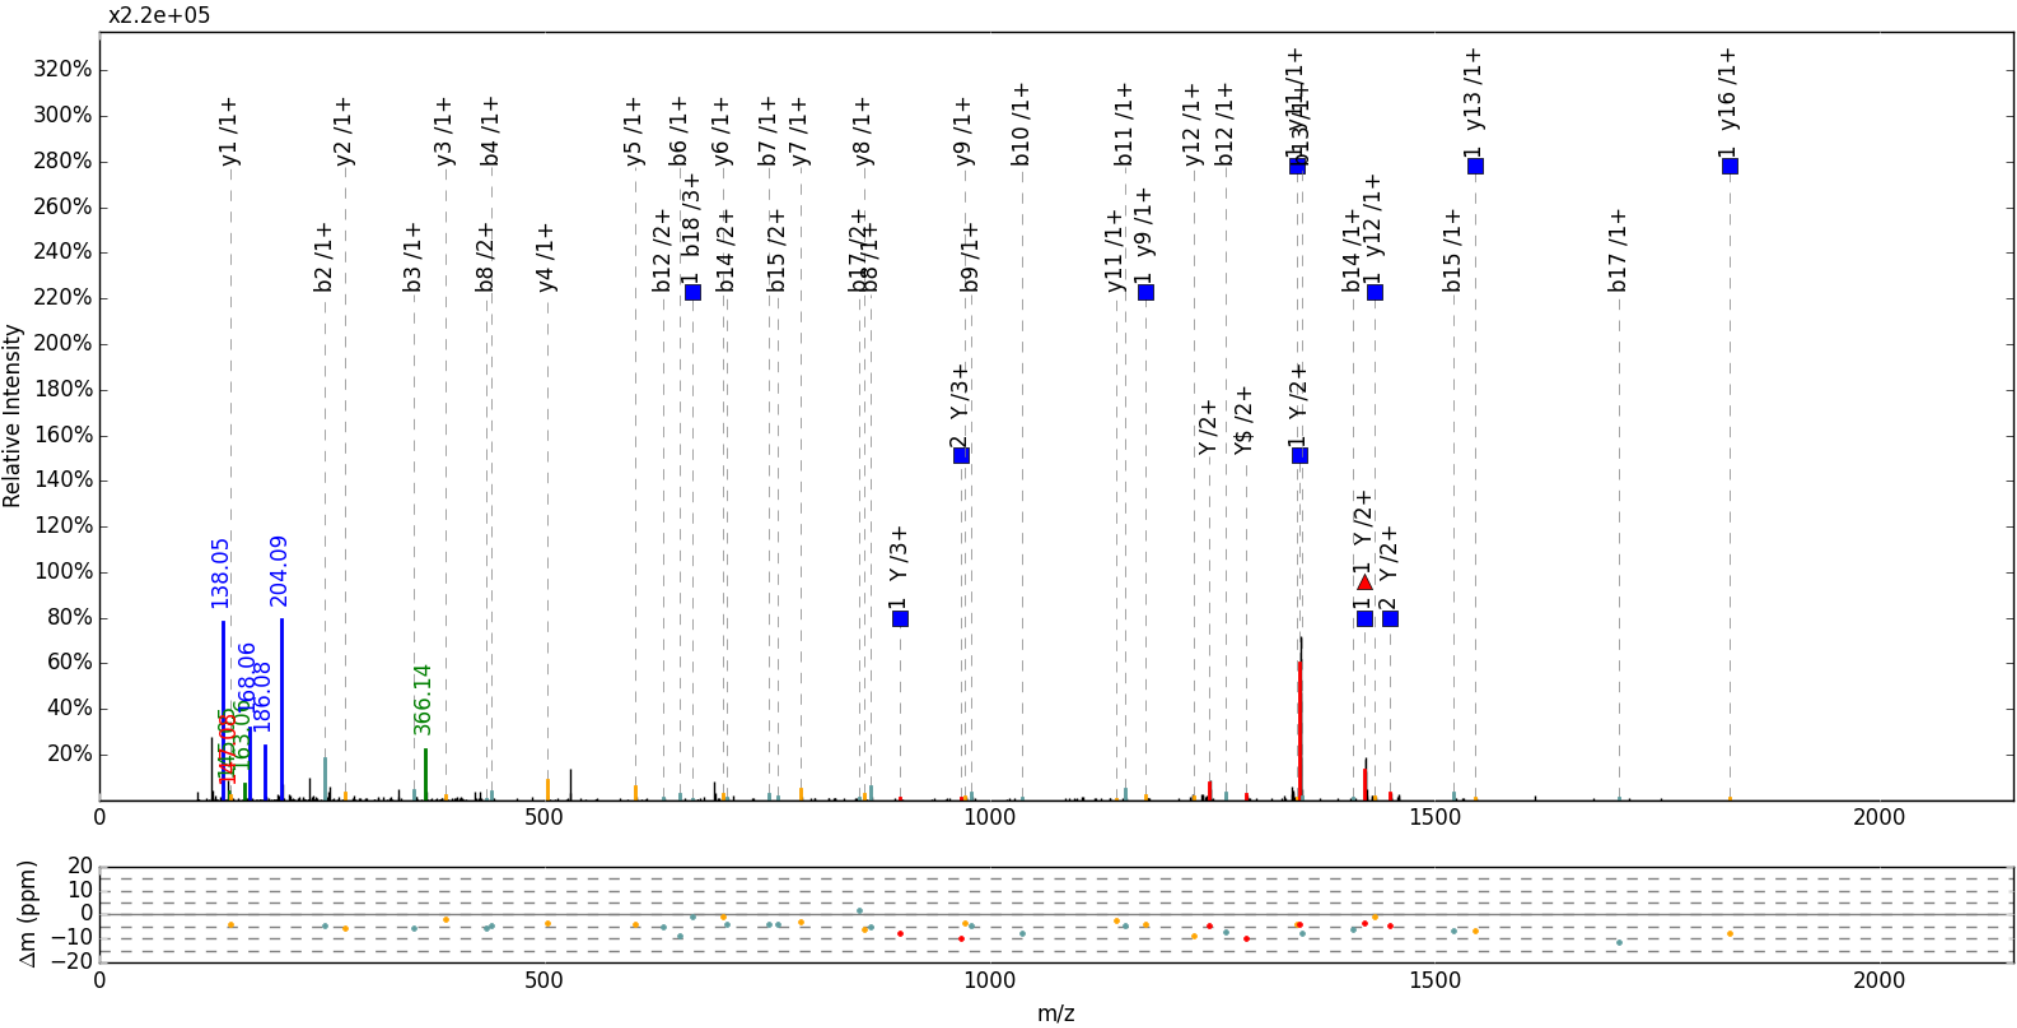



N1194

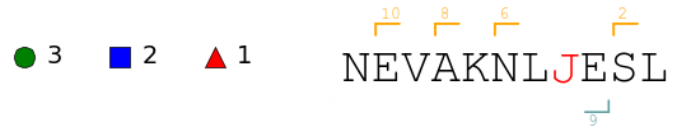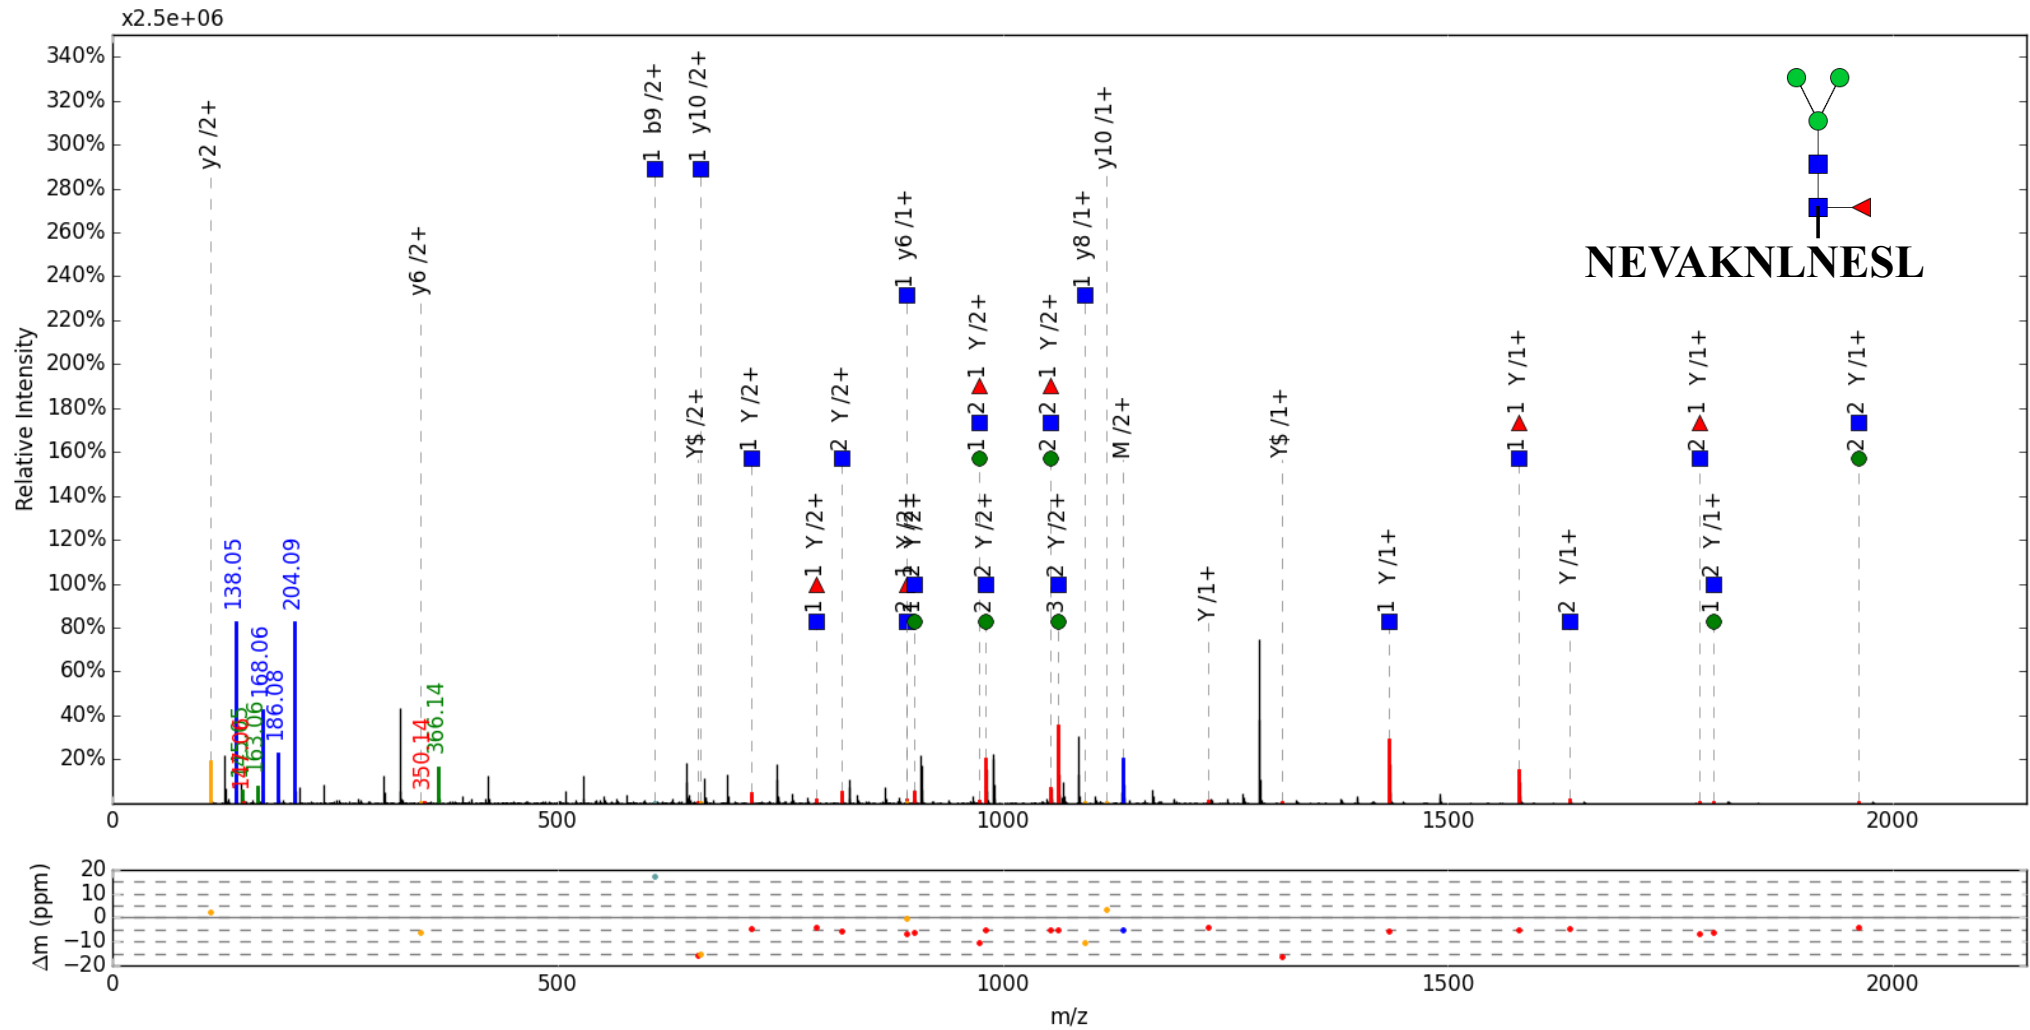

Supplement: Supplementary file 11 [file supplementary]
