# Supplementary material for: Identification of 22 N-glycosites on Spike Glycoprotein of SARS-CoV-2 and Accessible Surface Glycopeptide Motifs: Implications on Vaccination and Antibody Therapeutics
Source: Preprints.org preprint supplement (doi:10.20944/preprints202002.0381.v2), 2020-04-13
Supplement: Supplementary file 1 [file Supplemental Table 2.xlsx]

## Sheet: All Peptide PTM Quant
Protein\nname	Var. Pos.\nProtein	Glycans	Mod.\nNames	XIC area\nsummed	Mod.\nAAs
S protein	17	HexNAc(1)Fuc(1)	NGlycan/349.1373	83055400	N
S protein	17	HexNAc(2)	NGlycan/406.1587	7943230	N
S protein	17	HexNAc(2)Fuc(1)	NGlycan/552.2167	36797800	N
S protein	17	HexNAc(2)Hex(1)	NGlycan/568.2116	34909000	N
S protein	17	HexNAc(2)Hex(2)Fuc(1)	NGlycan/876.3223	11150400	N
S protein	17	HexNAc(2)Hex(3)	NGlycan/892.3172	128150000	N
S protein	17	HexNAc(2)Hex(3)Fuc(1)	NGlycan/1038.3751	17601900	N
S protein	17	HexNAc(2)Hex(4)Fuc(1)	NGlycan/1200.4279	32318700	N
S protein	17	HexNAc(2)Hex(6)	NGlycan/1378.4757	13741000	N
S protein	17	HexNAc(2)Hex(7)	NGlycan/1540.5285	4345120	N
S protein	17	HexNAc(2)Hex(8)	NGlycan/1702.5813	5492720	N
S protein	17	HexNAc(3)Hex(3)Fuc(1)	NGlycan/1241.4545	9176780	N
S protein	17	HexNAc(3)Hex(4)Fuc(1)	NGlycan/1403.5073	9936940	N
S protein	61	HexNAc(1)Fuc(1),HexNAc(2)Hex(9)	NGlycan/1864.6342	19640400	N
S protein	61	HexNAc(2)Fuc(1),HexNAc(2)Hex(7)	NGlycan/552.2167	2266080	N
S protein	61	HexNAc(2)Hex(1)Fuc(1),HexNAc(3)Hex(4)Fuc(1)	NGlycan/714.2695	41400400	N
S protein	61	HexNAc(2)Hex(2)	NGlycan/730.2644	128009000	N
S protein	61	HexNAc(2)Hex(2)Fuc(1)	NGlycan/876.3223	17649700	N
S protein	61	HexNAc(2)Hex(2)Fuc(1)	NGlycan/876.3223	464131000	N
S protein	61	HexNAc(2)Hex(2)Fuc(1),HexNAc(3)Hex(4)Fuc(1)	NGlycan/876.3223	7204030	N
S protein	61	HexNAc(2)Hex(3)	NGlycan/892.3172	32751000	N
S protein	61	HexNAc(2)Hex(3)	NGlycan/892.3172	151239000	N
S protein	61	HexNAc(2)Hex(3)	NGlycan/892.3172	891105000	N
S protein	61	HexNAc(2)Hex(3),HexNAc(2)Hex(3)Fuc(1)	NGlycan/1038.3751	15962300	N
S protein	61	HexNAc(2)Hex(3)Fuc(1)	NGlycan/1038.3751	27913400	N
S protein	61	HexNAc(2)Hex(3)Fuc(1)	NGlycan/1038.3751	116008000	N
S protein	61	HexNAc(2)Hex(3)Fuc(1)	NGlycan/1038.3751	1257700000	N
S protein	61	HexNAc(2)Hex(4)	NGlycan/1054.3700	19268300	N
S protein	61	HexNAc(2)Hex(4),HexNAc(2)Hex(7)	NGlycan/1054.3700	108975000	N
S protein	61	HexNAc(2)Hex(4),HexNAc(2)Hex(8)	NGlycan/1054.3700	10711300	N
S protein	61	HexNAc(2)Hex(4)Fuc(1)	NGlycan/1200.4279	1049270000	N
S protein	61	HexNAc(2)Hex(5)	NGlycan/1216.4229	17223300	N
S protein	61	HexNAc(2)Hex(5)	NGlycan/1216.4229	95137300	N
S protein	61	HexNAc(2)Hex(5)	NGlycan/1216.4229	590678000	N
S protein	61	HexNAc(2)Hex(5),HexNAc(2)Hex(9)	NGlycan/1216.4229	51200300	N
S protein	61	HexNAc(2)Hex(5)Fuc(1)	NGlycan/1362.4808	67470600	N
S protein	61	HexNAc(2)Hex(5)Fuc(1),HexNAc(2)Hex(7)	NGlycan/1362.4808	13685700	N
S protein	61	HexNAc(2)Hex(6)	NGlycan/1378.4757	27516200	N
S protein	61	HexNAc(2)Hex(6)	NGlycan/1378.4757	224778000	N
S protein	61	HexNAc(2)Hex(6)	NGlycan/1378.4757	1018350000	N
S protein	61	HexNAc(2)Hex(7)	NGlycan/1540.5285	27254900	N
S protein	61	HexNAc(2)Hex(7)	NGlycan/1540.5285	211813000	N
S protein	61	HexNAc(2)Hex(7)	NGlycan/1540.5285	835620000	N
S protein	61	HexNAc(2)Hex(7),HexNAc(2)Hex(7)	NGlycan/1540.5285	6585820	N
S protein	61	HexNAc(2)Hex(8)	NGlycan/1702.5813	21607300	N
S protein	61	HexNAc(2)Hex(8)	NGlycan/1702.5813	186097000	N
S protein	61	HexNAc(2)Hex(8)	NGlycan/1702.5813	884900000	N
S protein	61	HexNAc(2)Hex(9)	NGlycan/1864.6342	9303940	N
S protein	61	HexNAc(2)Hex(9)	NGlycan/1864.6342	54773000	N
S protein	61	HexNAc(2)Hex(9)	NGlycan/1864.6342	195257000	N
S protein	61	HexNAc(3)Hex(3)	NGlycan/1095.3966	9054300	N
S protein	61	HexNAc(3)Hex(3)	NGlycan/1095.3966	57504000	N
S protein	61	HexNAc(3)Hex(3)	NGlycan/1095.3966	247374000	N
S protein	61	HexNAc(3)Hex(3)Fuc(1)	NGlycan/1241.4545	159167000	N
S protein	61	HexNAc(3)Hex(4)	NGlycan/1257.4494	38599000	N
S protein	61	HexNAc(3)Hex(4)	NGlycan/1257.4494	243888000	N
S protein	61	HexNAc(3)Hex(4)Fuc(1)	NGlycan/1403.5073	22135900	N
S protein	61	HexNAc(3)Hex(5)	NGlycan/1419.5022	110513000	N
S protein	74	HexNAc(1)	NGlycan/203.0794	4816340	N
S protein	74	HexNAc(1)Fuc(1),HexNAc(2)Hex(9)	NGlycan/349.1373	19640400	N
S protein	74	HexNAc(2)Fuc(1)	NGlycan/552.2167	117284000	N
S protein	74	HexNAc(2)Fuc(1),HexNAc(2)Hex(7)	NGlycan/1540.5285	2266080	N
S protein	74	HexNAc(2)Hex(1)	NGlycan/568.2116	3019450	N
S protein	74	HexNAc(2)Hex(1)Fuc(1)	NGlycan/714.2695	17704300	N
S protein	74	HexNAc(2)Hex(1)Fuc(1),HexNAc(3)Hex(4)Fuc(1)	NGlycan/1403.5073	41400400	N
S protein	74	HexNAc(2)Hex(2)	NGlycan/730.2644	26770200	N
S protein	74	HexNAc(2)Hex(2)	NGlycan/730.2644	30683100	N
S protein	74	HexNAc(2)Hex(2)	NGlycan/730.2644	105830000	N
S protein	74	HexNAc(2)Hex(2)Fuc(1)	NGlycan/876.3223	4060980	N
S protein	74	HexNAc(2)Hex(2)Fuc(1)	NGlycan/876.3223	12444500	N
S protein	74	HexNAc(2)Hex(2)Fuc(1)	NGlycan/876.3223	60114700	N
S protein	74	HexNAc(2)Hex(2)Fuc(1)	NGlycan/876.3223	80052700	N
S protein	74	HexNAc(2)Hex(2)Fuc(1)	NGlycan/876.3223	985975000	N
S protein	74	HexNAc(2)Hex(2)Fuc(1),HexNAc(3)Hex(4)Fuc(1)	NGlycan/1403.5073	7204030	N
S protein	74	HexNAc(2)Hex(3)	NGlycan/892.3172	846951	N
S protein	74	HexNAc(2)Hex(3)	NGlycan/892.3172	1849280	N
S protein	74	HexNAc(2)Hex(3)	NGlycan/892.3172	14474300	N
S protein	74	HexNAc(2)Hex(3)	NGlycan/892.3172	88106100	N
S protein	74	HexNAc(2)Hex(3),HexNAc(2)Hex(3)Fuc(1)	NGlycan/892.3172	15962300	N
S protein	74	HexNAc(2)Hex(3)Fuc(1)	NGlycan/1038.3751	3459210	N
S protein	74	HexNAc(2)Hex(3)Fuc(1)	NGlycan/1038.3751	10927300	N
S protein	74	HexNAc(2)Hex(3)Fuc(1)	NGlycan/1038.3751	28226700	N
S protein	74	HexNAc(2)Hex(3)Fuc(1)	NGlycan/1038.3751	40327400	N
S protein	74	HexNAc(2)Hex(3)Fuc(1)	NGlycan/1038.3751	230636000	N
S protein	74	HexNAc(2)Hex(3)Fuc(1)	NGlycan/1038.3751	347692000	N
S protein	74	HexNAc(2)Hex(3)Fuc(1)	NGlycan/1038.3751	652210000	N
S protein	74	HexNAc(2)Hex(4)	NGlycan/1054.3700	2099920	N
S protein	74	HexNAc(2)Hex(4)	NGlycan/1054.3700	5992890	N
S protein	74	HexNAc(2)Hex(4),HexNAc(2)Hex(7)	NGlycan/1540.5285	108975000	N
S protein	74	HexNAc(2)Hex(4),HexNAc(2)Hex(8)	NGlycan/1702.5813	10711300	N
S protein	74	HexNAc(2)Hex(4)Fuc(1)	NGlycan/1200.4279	679624	N
S protein	74	HexNAc(2)Hex(4)Fuc(1)	NGlycan/1200.4279	1496080	N
S protein	74	HexNAc(2)Hex(4)Fuc(1)	NGlycan/1200.4279	3517520	N
S protein	74	HexNAc(2)Hex(4)Fuc(1)	NGlycan/1200.4279	9808330	N
S protein	74	HexNAc(2)Hex(5)	NGlycan/1216.4229	2509380	N
S protein	74	HexNAc(2)Hex(5)	NGlycan/1216.4229	18861000	N
S protein	74	HexNAc(2)Hex(5)	NGlycan/1216.4229	42579600	N
S protein	74	HexNAc(2)Hex(5)	NGlycan/1216.4229	51695000	N
S protein	74	HexNAc(2)Hex(5)	NGlycan/1216.4229	213079000	N
S protein	74	HexNAc(2)Hex(5),HexNAc(2)Hex(9)	NGlycan/1864.6342	51200300	N
S protein	74	HexNAc(2)Hex(5)Fuc(1)	NGlycan/1362.4808	6113010	N
S protein	74	HexNAc(2)Hex(5)Fuc(1),HexNAc(2)Hex(7)	NGlycan/1540.5285	13685700	N
S protein	74	HexNAc(2)Hex(6)	NGlycan/1378.4757	1716520	N
S protein	74	HexNAc(2)Hex(6)	NGlycan/1378.4757	33527300	N
S protein	74	HexNAc(2)Hex(6)	NGlycan/1378.4757	34023700	N
S protein	74	HexNAc(2)Hex(6)	NGlycan/1378.4757	341647000	N
S protein	74	HexNAc(2)Hex(7)	NGlycan/1540.5285	1787000	N
S protein	74	HexNAc(2)Hex(7)	NGlycan/1540.5285	2396820	N
S protein	74	HexNAc(2)Hex(7)	NGlycan/1540.5285	14941200	N
S protein	74	HexNAc(2)Hex(7)	NGlycan/1540.5285	50538000	N
S protein	74	HexNAc(2)Hex(7)	NGlycan/1540.5285	344967000	N
S protein	74	HexNAc(2)Hex(7),HexNAc(2)Hex(7)	NGlycan/1540.5285	6585820	N
S protein	74	HexNAc(2)Hex(8)	NGlycan/1702.5813	763839	N
S protein	74	HexNAc(2)Hex(8)	NGlycan/1702.5813	2517290	N
S protein	74	HexNAc(2)Hex(8)	NGlycan/1702.5813	7756450	N
S protein	74	HexNAc(2)Hex(8)	NGlycan/1702.5813	10412100	N
S protein	74	HexNAc(2)Hex(8)	NGlycan/1702.5813	14427100	N
S protein	74	HexNAc(2)Hex(8)	NGlycan/1702.5813	40407700	N
S protein	74	HexNAc(2)Hex(8)	NGlycan/1702.5813	295700000	N
S protein	74	HexNAc(2)Hex(9)	NGlycan/1864.6342	613751	N
S protein	74	HexNAc(2)Hex(9)	NGlycan/1864.6342	1430050	N
S protein	74	HexNAc(2)Hex(9)	NGlycan/1864.6342	2343260	N
S protein	74	HexNAc(2)Hex(9)	NGlycan/1864.6342	3867140	N
S protein	74	HexNAc(2)Hex(9)	NGlycan/1864.6342	7779760	N
S protein	74	HexNAc(2)Hex(9)	NGlycan/1864.6342	18123000	N
S protein	74	HexNAc(2)Hex(9)	NGlycan/1864.6342	30369100	N
S protein	74	HexNAc(2)Hex(9)	NGlycan/1864.6342	33301600	N
S protein	74	HexNAc(2)Hex(9)	NGlycan/1864.6342	171288000	N
S protein	74	HexNAc(3)Hex(3)	NGlycan/1095.3966	1607560	N
S protein	74	HexNAc(3)Hex(3)	NGlycan/1095.3966	3305120	N
S protein	74	HexNAc(3)Hex(3)	NGlycan/1095.3966	11074600	N
S protein	74	HexNAc(3)Hex(3)	NGlycan/1095.3966	12322500	N
S protein	74	HexNAc(3)Hex(3)	NGlycan/1095.3966	20917200	N
S protein	74	HexNAc(3)Hex(3)	NGlycan/1095.3966	39779600	N
S protein	74	HexNAc(3)Hex(3)Fuc(1)	NGlycan/1241.4545	476471	N
S protein	74	HexNAc(3)Hex(3)Fuc(1)	NGlycan/1241.4545	5022440	N
S protein	74	HexNAc(3)Hex(3)Fuc(1)	NGlycan/1241.4545	42577000	N
S protein	74	HexNAc(3)Hex(3)Fuc(1)	NGlycan/1241.4545	74637300	N
S protein	74	HexNAc(3)Hex(3)Fuc(1)	NGlycan/1241.4545	77051500	N
S protein	74	HexNAc(3)Hex(3)Fuc(1)	NGlycan/1241.4545	418398000	N
S protein	74	HexNAc(3)Hex(4)	NGlycan/1257.4494	1558590	N
S protein	74	HexNAc(3)Hex(4)	NGlycan/1257.4494	12677800	N
S protein	74	HexNAc(3)Hex(4)	NGlycan/1257.4494	34364100	N
S protein	74	HexNAc(3)Hex(4)Fuc(1)	NGlycan/1403.5073	629202	N
S protein	74	HexNAc(3)Hex(4)Fuc(1)	NGlycan/1403.5073	1046000	N
S protein	74	HexNAc(3)Hex(5)	NGlycan/1419.5022	16264100	N
S protein	74	HexNAc(3)Hex(5)	NGlycan/1419.5022	20047200	N
S protein	74	HexNAc(3)Hex(5)Fuc(1)	NGlycan/1565.5601	1165050	N
S protein	74	HexNAc(3)Hex(5)Fuc(1)	NGlycan/1565.5601	8230680	N
S protein	74	HexNAc(4)Hex(3)	NGlycan/1298.4760	1472120	N
S protein	74	HexNAc(4)Hex(3)	NGlycan/1298.4760	3264240	N
S protein	74	HexNAc(4)Hex(3)	NGlycan/1298.4760	3573560000	N
S protein	122	HexNAc(1)Fuc(1)	NGlycan/349.1373	5049570	N
S protein	122	HexNAc(2)Fuc(1)	NGlycan/552.2167	1663440000	N
S protein	122	HexNAc(2)Hex(1)	NGlycan/568.2116	3419090	N
S protein	122	HexNAc(2)Hex(1)	NGlycan/568.2116	21257700	N
S protein	122	HexNAc(2)Hex(2)	NGlycan/730.2644	167565000	N
S protein	122	HexNAc(2)Hex(2)	NGlycan/730.2644	256381000	N
S protein	122	HexNAc(2)Hex(2)	NGlycan/730.2644	804387000	N
S protein	122	HexNAc(2)Hex(2)	NGlycan/730.2644	6087830000	N
S protein	122	HexNAc(2)Hex(2)Fuc(1)	NGlycan/876.3223	42617100	N
S protein	122	HexNAc(2)Hex(2)Fuc(1)	NGlycan/876.3223	141715000	N
S protein	122	HexNAc(2)Hex(2)Fuc(1)	NGlycan/876.3223	280149000	N
S protein	122	HexNAc(2)Hex(2)Fuc(1)	NGlycan/876.3223	1748430000	N
S protein	122	HexNAc(2)Hex(3)	NGlycan/892.3172	359956000	N
S protein	122	HexNAc(2)Hex(3)	NGlycan/892.3172	976877000	N
S protein	122	HexNAc(2)Hex(3)	NGlycan/892.3172	1220240000	N
S protein	122	HexNAc(2)Hex(3)	NGlycan/892.3172	9740240000	N
S protein	122	HexNAc(2)Hex(3)Fuc(1)	NGlycan/1038.3751	206335000	N
S protein	122	HexNAc(2)Hex(3)Fuc(1)	NGlycan/1038.3751	957683000	N
S protein	122	HexNAc(2)Hex(3)Fuc(1)	NGlycan/1038.3751	1171130000	N
S protein	122	HexNAc(2)Hex(3)Fuc(1)	NGlycan/1038.3751	7297870000	N
S protein	122	HexNAc(2)Hex(4)	NGlycan/1054.3700	13432100	N
S protein	122	HexNAc(2)Hex(4)	NGlycan/1054.3700	126794000	N
S protein	122	HexNAc(2)Hex(4)Fuc(1)	NGlycan/1200.4279	63000800	N
S protein	122	HexNAc(2)Hex(5)	NGlycan/1216.4229	38532400	N
S protein	122	HexNAc(2)Hex(5)	NGlycan/1216.4229	40126500	N
S protein	122	HexNAc(2)Hex(5)	NGlycan/1216.4229	44113300	N
S protein	122	HexNAc(2)Hex(5)	NGlycan/1216.4229	44736800	N
S protein	122	HexNAc(2)Hex(5)	NGlycan/1216.4229	379429000	N
S protein	122	HexNAc(2)Hex(6)	NGlycan/1378.4757	50819000	N
S protein	122	HexNAc(2)Hex(6)	NGlycan/1378.4757	62664800	N
S protein	122	HexNAc(2)Hex(6)	NGlycan/1378.4757	80339700	N
S protein	122	HexNAc(2)Hex(6)	NGlycan/1378.4757	159009000	N
S protein	122	HexNAc(2)Hex(6)	NGlycan/1378.4757	412641000	N
S protein	122	HexNAc(2)Hex(7)	NGlycan/1540.5285	4498880	N
S protein	122	HexNAc(2)Hex(7)	NGlycan/1540.5285	47267700	N
S protein	122	HexNAc(2)Hex(7)	NGlycan/1540.5285	76723900	N
S protein	122	HexNAc(2)Hex(7)	NGlycan/1540.5285	89310600	N
S protein	122	HexNAc(2)Hex(7)	NGlycan/1540.5285	188577000	N
S protein	122	HexNAc(2)Hex(7)	NGlycan/1540.5285	411943000	N
S protein	122	HexNAc(2)Hex(8)	NGlycan/1702.5813	44449200	N
S protein	122	HexNAc(2)Hex(8)	NGlycan/1702.5813	66103900	N
S protein	122	HexNAc(2)Hex(8)	NGlycan/1702.5813	82814500	N
S protein	122	HexNAc(2)Hex(8)	NGlycan/1702.5813	242685000	N
S protein	122	HexNAc(2)Hex(8)	NGlycan/1702.5813	263314000	N
S protein	122	HexNAc(2)Hex(9)	NGlycan/1864.6342	2882980	N
S protein	122	HexNAc(2)Hex(9)	NGlycan/1864.6342	48973400	N
S protein	122	HexNAc(2)Hex(9)	NGlycan/1864.6342	93372400	N
S protein	122	HexNAc(2)Hex(9)	NGlycan/1864.6342	110597000	N
S protein	122	HexNAc(2)Hex(9)	NGlycan/1864.6342	232856000	N
S protein	122	HexNAc(2)Hex(9)	NGlycan/1864.6342	325516000	N
S protein	122	HexNAc(3)Hex(3)	NGlycan/1095.3966	13321300	N
S protein	122	HexNAc(3)Hex(3)	NGlycan/1095.3966	57980600	N
S protein	122	HexNAc(3)Hex(3)	NGlycan/1095.3966	67082600	N
S protein	122	HexNAc(3)Hex(3)	NGlycan/1095.3966	521865000	N
S protein	122	HexNAc(3)Hex(3)Fuc(1)	NGlycan/1241.4545	8608040	N
S protein	122	HexNAc(3)Hex(3)Fuc(1)	NGlycan/1241.4545	50938300	N
S protein	122	HexNAc(3)Hex(3)Fuc(1)	NGlycan/1241.4545	169735000	N
S protein	122	HexNAc(3)Hex(3)Fuc(1)	NGlycan/1241.4545	213732000	N
S protein	122	HexNAc(3)Hex(4)	NGlycan/1257.4494	12721400	N
S protein	122	HexNAc(3)Hex(4)	NGlycan/1257.4494	38086800	N
S protein	122	HexNAc(3)Hex(4)	NGlycan/1257.4494	41126400	N
S protein	122	HexNAc(3)Hex(4)	NGlycan/1257.4494	59071700	N
S protein	122	HexNAc(3)Hex(4)	NGlycan/1257.4494	82537500	N
S protein	122	HexNAc(3)Hex(4)Fuc(1)	NGlycan/1403.5073	13759800	N
S protein	122	HexNAc(3)Hex(5)	NGlycan/1419.5022	11611000	N
S protein	122	HexNAc(3)Hex(5)	NGlycan/1419.5022	18355400	N
S protein	122	HexNAc(3)Hex(5)	NGlycan/1419.5022	20149200	N
S protein	122	HexNAc(3)Hex(5)	NGlycan/1419.5022	55023600	N
S protein	122	HexNAc(3)Hex(5)	NGlycan/1419.5022	62767000	N
S protein	122	HexNAc(3)Hex(5)Fuc(1)	NGlycan/1565.5601	24868400	N
S protein	122	HexNAc(4)Hex(3)	NGlycan/1298.4760	4367710	N
S protein	122	HexNAc(4)Hex(3)	NGlycan/1298.4760	7540320	N
S protein	122	HexNAc(4)Hex(3)	NGlycan/1298.4760	24596700	N
S protein	149	HexNAc(2)Hex(3)Fuc(1)	NGlycan/1038.3751	1890890	N
S protein	149	HexNAc(2)Hex(7)	NGlycan/1540.5285	1930310	N
S protein	149	HexNAc(2)Hex(7)	NGlycan/1540.5285	9354290	N
S protein	149	HexNAc(2)Hex(8)	NGlycan/1702.5813	9776970	N
S protein	149	HexNAc(3)Hex(4)	NGlycan/1257.4494	8526280	N
S protein	165	HexNAc(2)Hex(2)	NGlycan/730.2644	7339670	N
S protein	165	HexNAc(2)Hex(2)	NGlycan/730.2644	15943300	N
S protein	165	HexNAc(2)Hex(2)Fuc(1)	NGlycan/876.3223	28621400	N
S protein	165	HexNAc(2)Hex(2)Fuc(1)	NGlycan/876.3223	35370800	N
S protein	165	HexNAc(2)Hex(2)Fuc(1)	NGlycan/876.3223	38032900	N
S protein	165	HexNAc(2)Hex(2)Fuc(1)	NGlycan/876.3223	44026000	N
S protein	165	HexNAc(2)Hex(2)Fuc(1)	NGlycan/876.3223	46850700	N
S protein	165	HexNAc(2)Hex(2)Fuc(1)	NGlycan/876.3223	48453500	N
S protein	165	HexNAc(2)Hex(3)	NGlycan/892.3172	16348300	N
S protein	165	HexNAc(2)Hex(3)	NGlycan/892.3172	28457800	N
S protein	165	HexNAc(2)Hex(3)	NGlycan/892.3172	30360800	N
S protein	165	HexNAc(2)Hex(3)	NGlycan/892.3172	49585900	N
S protein	165	HexNAc(2)Hex(3)	NGlycan/892.3172	102868000	N
S protein	165	HexNAc(2)Hex(3)Fuc(1)	NGlycan/1038.3751	115979000	N
S protein	165	HexNAc(2)Hex(3)Fuc(1)	NGlycan/1038.3751	133717000	N
S protein	165	HexNAc(2)Hex(3)Fuc(1)	NGlycan/1038.3751	216950000	N
S protein	165	HexNAc(2)Hex(3)Fuc(1)	NGlycan/1038.3751	499436000	N
S protein	165	HexNAc(2)Hex(4)	NGlycan/1054.3700	11970800	N
S protein	165	HexNAc(2)Hex(4)Fuc(1)	NGlycan/1200.4279	5852300	N
S protein	165	HexNAc(2)Hex(4)Fuc(1)	NGlycan/1200.4279	9811180	N
S protein	165	HexNAc(2)Hex(5)	NGlycan/1216.4229	3628360	N
S protein	165	HexNAc(2)Hex(5)	NGlycan/1216.4229	5800110	N
S protein	165	HexNAc(2)Hex(5)	NGlycan/1216.4229	14400100	N
S protein	165	HexNAc(2)Hex(5)	NGlycan/1216.4229	15205300	N
S protein	165	HexNAc(2)Hex(6)	NGlycan/1378.4757	8671420	N
S protein	165	HexNAc(2)Hex(6)	NGlycan/1378.4757	11755600	N
S protein	165	HexNAc(2)Hex(6)	NGlycan/1378.4757	30167700	N
S protein	165	HexNAc(2)Hex(7)	NGlycan/1540.5285	243286	N
S protein	165	HexNAc(2)Hex(7)	NGlycan/1540.5285	3093840	N
S protein	165	HexNAc(2)Hex(7)	NGlycan/1540.5285	4414460	N
S protein	165	HexNAc(2)Hex(7)	NGlycan/1540.5285	5557190	N
S protein	165	HexNAc(2)Hex(8)	NGlycan/1702.5813	1737070	N
S protein	165	HexNAc(2)Hex(8)	NGlycan/1702.5813	2058910	N
S protein	165	HexNAc(2)Hex(8)	NGlycan/1702.5813	6084240	N
S protein	165	HexNAc(2)Hex(8)	NGlycan/1702.5813	8032690	N
S protein	165	HexNAc(2)Hex(8)	NGlycan/1702.5813	11938600	N
S protein	165	HexNAc(2)Hex(9)	NGlycan/1864.6342	1570050	N
S protein	165	HexNAc(2)Hex(9)	NGlycan/1864.6342	2013610	N
S protein	165	HexNAc(2)Hex(9)	NGlycan/1864.6342	4726700	N
S protein	165	HexNAc(2)Hex(9)	NGlycan/1864.6342	6606220	N
S protein	165	HexNAc(2)Hex(9)	NGlycan/1864.6342	6872670	N
S protein	165	HexNAc(2)Hex(9)	NGlycan/1864.6342	7014720	N
S protein	165	HexNAc(2)Hex(9)	NGlycan/1864.6342	16360000	N
S protein	165	HexNAc(3)Hex(3)	NGlycan/1095.3966	4245130	N
S protein	165	HexNAc(3)Hex(3)	NGlycan/1095.3966	5608370	N
S protein	165	HexNAc(3)Hex(3)	NGlycan/1095.3966	22304700	N
S protein	165	HexNAc(3)Hex(3)	NGlycan/1095.3966	22961700	N
S protein	165	HexNAc(3)Hex(3)Fuc(1)	NGlycan/1241.4545	5744500	N
S protein	165	HexNAc(3)Hex(3)Fuc(1)	NGlycan/1241.4545	8181210	N
S protein	165	HexNAc(3)Hex(3)Fuc(1)	NGlycan/1241.4545	15340200	N
S protein	165	HexNAc(3)Hex(3)Fuc(1)	NGlycan/1241.4545	19696600	N
S protein	165	HexNAc(3)Hex(3)Fuc(1)	NGlycan/1241.4545	22151300	N
S protein	165	HexNAc(3)Hex(4)	NGlycan/1257.4494	5421030	N
S protein	165	HexNAc(3)Hex(5)	NGlycan/1419.5022	2137230	N
S protein	165	HexNAc(3)Hex(5)	NGlycan/1419.5022	2746020	N
S protein	165	HexNAc(3)Hex(5)	NGlycan/1419.5022	4546780	N
S protein	165	HexNAc(3)Hex(5)	NGlycan/1419.5022	28929500	N
S protein	165	HexNAc(4)Hex(3)Fuc(1)	NGlycan/1444.5339	3362750	N
S protein	165	HexNAc(4)Hex(3)Fuc(1)	NGlycan/1444.5339	6372430	N
S protein	234	HexNAc(1)	NGlycan/203.0794	8607520	N
S protein	234	HexNAc(2)	NGlycan/406.1587	3613590	N
S protein	234	HexNAc(2)	NGlycan/406.1587	8504060	N
S protein	234	HexNAc(2)Fuc(1)	NGlycan/552.2167	4154240	N
S protein	234	HexNAc(2)Fuc(1)	NGlycan/552.2167	9892240	N
S protein	234	HexNAc(2)Hex(1)	NGlycan/568.2116	28511700	N
S protein	234	HexNAc(2)Hex(2)	NGlycan/730.2644	2118030	N
S protein	234	HexNAc(2)Hex(2)	NGlycan/730.2644	84571300	N
S protein	234	HexNAc(2)Hex(2)	NGlycan/730.2644	90387900	N
S protein	234	HexNAc(2)Hex(2)Fuc(1)	NGlycan/876.3223	10120500	N
S protein	234	HexNAc(2)Hex(2)Fuc(1)	NGlycan/876.3223	99187600	N
S protein	234	HexNAc(2)Hex(2)Fuc(1)	NGlycan/876.3223	214992000	N
S protein	234	HexNAc(2)Hex(2)Fuc(1)	NGlycan/876.3223	385232000	N
S protein	234	HexNAc(2)Hex(3)	NGlycan/892.3172	17278200	N
S protein	234	HexNAc(2)Hex(3)	NGlycan/892.3172	521968000	N
S protein	234	HexNAc(2)Hex(3)	NGlycan/892.3172	582820000	N
S protein	234	HexNAc(2)Hex(3)Fuc(1)	NGlycan/1038.3751	11268100	N
S protein	234	HexNAc(2)Hex(3)Fuc(1)	NGlycan/1038.3751	937898000	N
S protein	234	HexNAc(2)Hex(3)Fuc(1)	NGlycan/1038.3751	2246310000	N
S protein	234	HexNAc(2)Hex(4)	NGlycan/1054.3700	19043500	N
S protein	234	HexNAc(2)Hex(4)	NGlycan/1054.3700	146231000	N
S protein	234	HexNAc(2)Hex(4)	NGlycan/1054.3700	1192400000	N
S protein	234	HexNAc(2)Hex(5)	NGlycan/1216.4229	6885580	N
S protein	234	HexNAc(2)Hex(5)	NGlycan/1216.4229	117601000	N
S protein	234	HexNAc(2)Hex(5)	NGlycan/1216.4229	237957000	N
S protein	234	HexNAc(2)Hex(6)	NGlycan/1378.4757	233027000	N
S protein	234	HexNAc(2)Hex(6)	NGlycan/1378.4757	741247000	N
S protein	234	HexNAc(2)Hex(7)	NGlycan/1540.5285	11335500	N
S protein	234	HexNAc(2)Hex(7)	NGlycan/1540.5285	297785000	N
S protein	234	HexNAc(2)Hex(7)	NGlycan/1540.5285	1332190000	N
S protein	234	HexNAc(2)Hex(8)	NGlycan/1702.5813	20848400	N
S protein	234	HexNAc(2)Hex(8)	NGlycan/1702.5813	28452700	N
S protein	234	HexNAc(2)Hex(8)	NGlycan/1702.5813	50169400	N
S protein	234	HexNAc(2)Hex(8)	NGlycan/1702.5813	63186700	N
S protein	234	HexNAc(2)Hex(8)	NGlycan/1702.5813	67068200	N
S protein	234	HexNAc(2)Hex(8)	NGlycan/1702.5813	347967000	N
S protein	234	HexNAc(2)Hex(8)	NGlycan/1702.5813	1948130000	N
S protein	234	HexNAc(2)Hex(9)	NGlycan/1864.6342	3182380	N
S protein	234	HexNAc(2)Hex(9)	NGlycan/1864.6342	54155000	N
S protein	234	HexNAc(2)Hex(9)	NGlycan/1864.6342	417423000	N
S protein	234	HexNAc(2)Hex(9)	NGlycan/1864.6342	2558250000	N
S protein	234	HexNAc(3)Hex(3)	NGlycan/1095.3966	189146000	N
S protein	234	HexNAc(3)Hex(3)	NGlycan/1095.3966	784588000	N
S protein	234	HexNAc(3)Hex(3)Fuc(1)	NGlycan/1241.4545	84956800	N
S protein	234	HexNAc(3)Hex(3)Fuc(1)	NGlycan/1241.4545	394034000	N
S protein	234	HexNAc(3)Hex(4)	NGlycan/1257.4494	54981200	N
S protein	234	HexNAc(3)Hex(4)	NGlycan/1257.4494	713714000	N
S protein	234	HexNAc(3)Hex(4)Fuc(1)	NGlycan/1403.5073	9106040	N
S protein	234	HexNAc(3)Hex(5)	NGlycan/1419.5022	564626	N
S protein	234	HexNAc(3)Hex(5)	NGlycan/1419.5022	42134000	N
S protein	234	HexNAc(3)Hex(5)	NGlycan/1419.5022	364656000	N
S protein	282	HexNAc(2)Hex(3)Fuc(1)	NGlycan/1038.3751	3729450	N
S protein	282	HexNAc(2)Hex(6)	NGlycan/1378.4757	1676890	N
S protein	282	HexNAc(2)Hex(6)	NGlycan/1378.4757	6691290	N
S protein	282	HexNAc(2)Hex(7)	NGlycan/1540.5285	29958700	N
S protein	282	HexNAc(2)Hex(7)	NGlycan/1540.5285	80485000	N
S protein	282	HexNAc(2)Hex(7)	NGlycan/1540.5285	134944000	N
S protein	282	HexNAc(2)Hex(9)	NGlycan/1864.6342	3761170	N
S protein	282	HexNAc(3)Hex(4)	NGlycan/1257.4494	4218880	N
S protein	282	HexNAc(4)Hex(3)Fuc(1)	NGlycan/1444.5339	3471680	N
S protein	331	HexNAc(1)	NGlycan/203.0794	6370850	N
S protein	331	HexNAc(1)	NGlycan/203.0794	134397000	N
S protein	331	HexNAc(1)Fuc(1)	NGlycan/349.1373	5435290	N
S protein	331	HexNAc(2)Hex(2)	NGlycan/730.2644	29622500	N
S protein	331	HexNAc(2)Hex(2)	NGlycan/730.2644	43836900	N
S protein	331	HexNAc(2)Hex(2)Fuc(1)	NGlycan/876.3223	188718000	N
S protein	331	HexNAc(2)Hex(2)Fuc(1)	NGlycan/876.3223	228755000	N
S protein	331	HexNAc(2)Hex(2)Fuc(1)	NGlycan/876.3223	444601000	N
S protein	331	HexNAc(2)Hex(2)Fuc(1)	NGlycan/876.3223	450436000	N
S protein	331	HexNAc(2)Hex(3)	NGlycan/892.3172	2580070	N
S protein	331	HexNAc(2)Hex(3)	NGlycan/892.3172	7016640	N
S protein	331	HexNAc(2)Hex(3)	NGlycan/892.3172	7149390	N
S protein	331	HexNAc(2)Hex(3)	NGlycan/892.3172	75767500	N
S protein	331	HexNAc(2)Hex(3)	NGlycan/892.3172	130223000	N
S protein	331	HexNAc(2)Hex(3)	NGlycan/892.3172	214765000	N
S protein	331	HexNAc(2)Hex(3)	NGlycan/892.3172	232367000	N
S protein	331	HexNAc(2)Hex(3)Fuc(1)	NGlycan/1038.3751	6713030	N
S protein	331	HexNAc(2)Hex(3)Fuc(1)	NGlycan/1038.3751	19878500	N
S protein	331	HexNAc(2)Hex(3)Fuc(1)	NGlycan/1038.3751	30438700	N
S protein	331	HexNAc(2)Hex(3)Fuc(1)	NGlycan/1038.3751	539530000	N
S protein	331	HexNAc(2)Hex(3)Fuc(1)	NGlycan/1038.3751	554218000	N
S protein	331	HexNAc(2)Hex(3)Fuc(1)	NGlycan/1038.3751	971187000	N
S protein	331	HexNAc(2)Hex(4)	NGlycan/1054.3700	8332060	N
S protein	331	HexNAc(2)Hex(4)	NGlycan/1054.3700	13345100	N
S protein	331	HexNAc(2)Hex(4)	NGlycan/1054.3700	143093000	N
S protein	331	HexNAc(2)Hex(4)Fuc(1)	NGlycan/1200.4279	37763900	N
S protein	331	HexNAc(2)Hex(4)Fuc(1)	NGlycan/1200.4279	393385000	N
S protein	331	HexNAc(2)Hex(4)Fuc(1)	NGlycan/1200.4279	407781000	N
S protein	331	HexNAc(2)Hex(5)	NGlycan/1216.4229	5639080	N
S protein	331	HexNAc(2)Hex(5)	NGlycan/1216.4229	8204360	N
S protein	331	HexNAc(2)Hex(5)	NGlycan/1216.4229	21361000	N
S protein	331	HexNAc(2)Hex(5)	NGlycan/1216.4229	29090800	N
S protein	331	HexNAc(2)Hex(5)Fuc(1)	NGlycan/1362.4808	20362300	N
S protein	331	HexNAc(2)Hex(6)	NGlycan/1378.4757	749664	N
S protein	331	HexNAc(2)Hex(6)	NGlycan/1378.4757	3742680	N
S protein	331	HexNAc(2)Hex(6)	NGlycan/1378.4757	7466040	N
S protein	331	HexNAc(2)Hex(6)	NGlycan/1378.4757	22509600	N
S protein	331	HexNAc(2)Hex(6)	NGlycan/1378.4757	23728000	N
S protein	331	HexNAc(2)Hex(7)	NGlycan/1540.5285	18408600	N
S protein	331	HexNAc(2)Hex(8)	NGlycan/1702.5813	17627500	N
S protein	331	HexNAc(2)Hex(9)	NGlycan/1864.6342	1087430	N
S protein	331	HexNAc(2)Hex(9)	NGlycan/1864.6342	5407360	N
S protein	331	HexNAc(2)Hex(9)	NGlycan/1864.6342	13163700	N
S protein	331	HexNAc(3)Hex(3)	NGlycan/1095.3966	13850300	N
S protein	331	HexNAc(3)Hex(3)	NGlycan/1095.3966	17976000	N
S protein	331	HexNAc(3)Hex(3)	NGlycan/1095.3966	44830500	N
S protein	331	HexNAc(3)Hex(3)Fuc(1)	NGlycan/1241.4545	3509190	N
S protein	331	HexNAc(3)Hex(3)Fuc(1)	NGlycan/1241.4545	6007890	N
S protein	331	HexNAc(3)Hex(3)Fuc(1)	NGlycan/1241.4545	12038300	N
S protein	331	HexNAc(3)Hex(3)Fuc(1)	NGlycan/1241.4545	12305100	N
S protein	331	HexNAc(3)Hex(4)	NGlycan/1257.4494	20993300	N
S protein	331	HexNAc(3)Hex(4)Fuc(1)	NGlycan/1403.5073	43578900	N
S protein	331	HexNAc(3)Hex(5)	NGlycan/1419.5022	19422600	N
S protein	331	HexNAc(3)Hex(5)	NGlycan/1419.5022	34796900	N
S protein	331	HexNAc(4)Hex(3)Fuc(1)	NGlycan/1444.5339	268499000	N
S protein	343	HexNAc(2)Hex(2)	NGlycan/730.2644	5591520	N
S protein	343	HexNAc(2)Hex(2)	NGlycan/730.2644	21637000	N
S protein	343	HexNAc(2)Hex(2)Fuc(1)	NGlycan/876.3223	2396000	N
S protein	343	HexNAc(2)Hex(2)Fuc(1)	NGlycan/876.3223	95458400	N
S protein	343	HexNAc(2)Hex(2)Fuc(1)	NGlycan/876.3223	359179000	N
S protein	343	HexNAc(2)Hex(3)	NGlycan/892.3172	65011200	N
S protein	343	HexNAc(2)Hex(3)	NGlycan/892.3172	232054000	N
S protein	343	HexNAc(2)Hex(3)Fuc(1)	NGlycan/1038.3751	45389800	N
S protein	343	HexNAc(2)Hex(3)Fuc(1)	NGlycan/1038.3751	516745000	N
S protein	343	HexNAc(2)Hex(3)Fuc(1)	NGlycan/1038.3751	808969000	N
S protein	343	HexNAc(2)Hex(3)Fuc(1)	NGlycan/1038.3751	3263720000	N
S protein	343	HexNAc(2)Hex(4)	NGlycan/1054.3700	10353700	N
S protein	343	HexNAc(2)Hex(4)Fuc(1)	NGlycan/1200.4279	2586710	N
S protein	343	HexNAc(2)Hex(4)Fuc(1)	NGlycan/1200.4279	7851600	N
S protein	343	HexNAc(2)Hex(4)Fuc(1)	NGlycan/1200.4279	26658600	N
S protein	343	HexNAc(2)Hex(4)Fuc(1)	NGlycan/1200.4279	74700100	N
S protein	343	HexNAc(2)Hex(5)	NGlycan/1216.4229	2656490	N
S protein	343	HexNAc(2)Hex(5)	NGlycan/1216.4229	3215090	N
S protein	343	HexNAc(2)Hex(5)	NGlycan/1216.4229	54006400	N
S protein	343	HexNAc(2)Hex(5)	NGlycan/1216.4229	79897500	N
S protein	343	HexNAc(2)Hex(5)	NGlycan/1216.4229	86679500	N
S protein	343	HexNAc(2)Hex(5)Fuc(1)	NGlycan/1362.4808	3256930	N
S protein	343	HexNAc(2)Hex(6)	NGlycan/1378.4757	2962410	N
S protein	343	HexNAc(2)Hex(6)	NGlycan/1378.4757	18319100	N
S protein	343	HexNAc(2)Hex(6)	NGlycan/1378.4757	121503000	N
S protein	343	HexNAc(2)Hex(6)	NGlycan/1378.4757	205471000	N
S protein	343	HexNAc(2)Hex(7)	NGlycan/1540.5285	4182930	N
S protein	343	HexNAc(2)Hex(7)	NGlycan/1540.5285	5194980	N
S protein	343	HexNAc(2)Hex(7)	NGlycan/1540.5285	31649700	N
S protein	343	HexNAc(2)Hex(7)	NGlycan/1540.5285	103454000	N
S protein	343	HexNAc(2)Hex(8)	NGlycan/1702.5813	3418140	N
S protein	343	HexNAc(2)Hex(8)	NGlycan/1702.5813	3701210	N
S protein	343	HexNAc(2)Hex(8)	NGlycan/1702.5813	6722070	N
S protein	343	HexNAc(2)Hex(8)	NGlycan/1702.5813	55678800	N
S protein	343	HexNAc(2)Hex(9)	NGlycan/1864.6342	1833530	N
S protein	343	HexNAc(2)Hex(9)	NGlycan/1864.6342	3647560	N
S protein	343	HexNAc(2)Hex(9)	NGlycan/1864.6342	3859630	N
S protein	343	HexNAc(2)Hex(9)	NGlycan/1864.6342	10645400	N
S protein	343	HexNAc(2)Hex(9)	NGlycan/1864.6342	62137700	N
S protein	343	HexNAc(3)Hex(3)	NGlycan/1095.3966	6825170	N
S protein	343	HexNAc(3)Hex(3)	NGlycan/1095.3966	64055900	N
S protein	343	HexNAc(3)Hex(3)	NGlycan/1095.3966	70280600	N
S protein	343	HexNAc(3)Hex(3)	NGlycan/1095.3966	365533000	N
S protein	343	HexNAc(3)Hex(3)Fuc(1)	NGlycan/1241.4545	283190	N
S protein	343	HexNAc(3)Hex(3)Fuc(1)	NGlycan/1241.4545	6327080	N
S protein	343	HexNAc(3)Hex(3)Fuc(1)	NGlycan/1241.4545	39250900	N
S protein	343	HexNAc(3)Hex(3)Fuc(1)	NGlycan/1241.4545	86666700	N
S protein	343	HexNAc(3)Hex(4)	NGlycan/1257.4494	3181340	N
S protein	343	HexNAc(3)Hex(4)	NGlycan/1257.4494	28795600	N
S protein	343	HexNAc(3)Hex(4)	NGlycan/1257.4494	29771200	N
S protein	343	HexNAc(3)Hex(4)Fuc(1)	NGlycan/1403.5073	24767600	N
S protein	343	HexNAc(3)Hex(5)	NGlycan/1419.5022	1617280	N
S protein	343	HexNAc(3)Hex(5)	NGlycan/1419.5022	13149300	N
S protein	343	HexNAc(3)Hex(5)	NGlycan/1419.5022	39562900	N
S protein	343	HexNAc(3)Hex(5)Fuc(1)	NGlycan/1565.5601	1288360	N
S protein	343	HexNAc(4)Hex(3)	NGlycan/1298.4760	2343570	N
S protein	343	HexNAc(4)Hex(3)Fuc(1)	NGlycan/1444.5339	6525980	N
S protein	603	HexNAc(1)	NGlycan/203.0794	10949800	N
S protein	603	HexNAc(1),HexNAc(2)Hex(1)	NGlycan/568.2116	9526550	N
S protein	603	HexNAc(1)Fuc(1)	NGlycan/349.1373	1537760	N
S protein	603	HexNAc(1)Fuc(1),HexNAc(2)Fuc(1)	NGlycan/552.2167	988738	N
S protein	603	HexNAc(1)Fuc(1),HexNAc(2)Hex(2)Fuc(1)	NGlycan/876.3223	31290400	N
S protein	603	HexNAc(2)Fuc(1),HexNAc(2)Hex(5)Fuc(1)	NGlycan/552.2167	10775400	N
S protein	603	HexNAc(2)Fuc(1),HexNAc(4)Hex(3)	NGlycan/1298.4760	913604	N
S protein	603	HexNAc(2)Hex(1),HexNAc(3)Hex(3)	NGlycan/1095.3966	1954790	N
S protein	603	HexNAc(2)Hex(2)	NGlycan/730.2644	14666300	N
S protein	603	HexNAc(2)Hex(2)	NGlycan/730.2644	20495500	N
S protein	603	HexNAc(2)Hex(2)	NGlycan/730.2644	44898600	N
S protein	603	HexNAc(2)Hex(2)	NGlycan/730.2644	158341000	N
S protein	603	HexNAc(2)Hex(2),HexNAc(3)Hex(3)	NGlycan/1095.3966	22564300	N
S protein	603	HexNAc(2)Hex(2),HexNAc(3)Hex(3)Fuc(1)	NGlycan/1241.4545	2865020	N
S protein	603	HexNAc(2)Hex(2)Fuc(1)	NGlycan/876.3223	17273300	N
S protein	603	HexNAc(2)Hex(2)Fuc(1)	NGlycan/876.3223	57122600	N
S protein	603	HexNAc(2)Hex(2)Fuc(1)	NGlycan/876.3223	137874000	N
S protein	603	HexNAc(2)Hex(2)Fuc(1)	NGlycan/876.3223	614616000	N
S protein	603	HexNAc(2)Hex(2)Fuc(1),HexNAc(2)Hex(3)	NGlycan/876.3223	8437700	N
S protein	603	HexNAc(2)Hex(2)Fuc(1),HexNAc(2)Hex(4)Fuc(1)	NGlycan/876.3223	52836400	N
S protein	603	HexNAc(2)Hex(2)Fuc(1),HexNAc(2)Hex(5)	NGlycan/876.3223	2395810	N
S protein	603	HexNAc(2)Hex(2)Fuc(1),HexNAc(2)Hex(5)	NGlycan/1216.4229	17914800	N
S protein	603	HexNAc(2)Hex(3)	NGlycan/892.3172	3798700	N
S protein	603	HexNAc(2)Hex(3)	NGlycan/892.3172	13506800	N
S protein	603	HexNAc(2)Hex(3)	NGlycan/892.3172	35768900	N
S protein	603	HexNAc(2)Hex(3)	NGlycan/892.3172	162802000	N
S protein	603	HexNAc(2)Hex(3)	NGlycan/892.3172	560888000	N
S protein	603	HexNAc(2)Hex(3)Fuc(1)	NGlycan/1038.3751	8347500	N
S protein	603	HexNAc(2)Hex(3)Fuc(1)	NGlycan/1038.3751	117872000	N
S protein	603	HexNAc(2)Hex(3)Fuc(1)	NGlycan/1038.3751	460824000	N
S protein	603	HexNAc(2)Hex(3)Fuc(1)	NGlycan/1038.3751	480789000	N
S protein	603	HexNAc(2)Hex(3)Fuc(1)	NGlycan/1038.3751	2289310000	N
S protein	603	HexNAc(2)Hex(4)	NGlycan/1054.3700	21503700	N
S protein	603	HexNAc(2)Hex(4),HexNAc(4)Hex(3)Fuc(1)	NGlycan/1054.3700	10577200	N
S protein	603	HexNAc(2)Hex(4)Fuc(1)	NGlycan/1200.4279	3264650	N
S protein	603	HexNAc(2)Hex(4)Fuc(1)	NGlycan/1200.4279	30313100	N
S protein	603	HexNAc(2)Hex(5)	NGlycan/1216.4229	7511450	N
S protein	603	HexNAc(2)Hex(5)	NGlycan/1216.4229	1262950000	N
S protein	603	HexNAc(2)Hex(5),HexNAc(4)Hex(3)Fuc(1)	NGlycan/1216.4229	17000000	N
S protein	603	HexNAc(2)Hex(5)Fuc(1)	NGlycan/1362.4808	6906590	N
S protein	603	HexNAc(2)Hex(6)	NGlycan/1378.4757	2075720	N
S protein	603	HexNAc(2)Hex(6)	NGlycan/1378.4757	22752400	N
S protein	603	HexNAc(2)Hex(7)	NGlycan/1540.5285	6736860	N
S protein	603	HexNAc(2)Hex(7)	NGlycan/1540.5285	26949200	N
S protein	603	HexNAc(2)Hex(8)	NGlycan/1702.5813	12738300	N
S protein	603	HexNAc(3)Hex(3)	NGlycan/1095.3966	14730600	N
S protein	603	HexNAc(3)Hex(3)	NGlycan/1095.3966	172786000	N
S protein	603	HexNAc(3)Hex(3)Fuc(1)	NGlycan/1241.4545	1398140	N
S protein	603	HexNAc(3)Hex(3)Fuc(1)	NGlycan/1241.4545	9769680	N
S protein	603	HexNAc(3)Hex(3)Fuc(1)	NGlycan/1241.4545	87036600	N
S protein	603	HexNAc(3)Hex(3)Fuc(1)	NGlycan/1241.4545	342597000	N
S protein	603	HexNAc(3)Hex(3)Fuc(1),HexNAc(4)Hex(3)Fuc(1)	NGlycan/1241.4545	5457250	N
S protein	603	HexNAc(3)Hex(4)	NGlycan/1257.4494	110368000	N
S protein	603	HexNAc(3)Hex(4),HexNAc(4)Hex(3)	NGlycan/1257.4494	9537670	N
S protein	603	HexNAc(3)Hex(4),HexNAc(4)Hex(3)Fuc(1)	NGlycan/1257.4494	14466300	N
S protein	603	HexNAc(3)Hex(4),HexNAc(4)Hex(3)Fuc(1)	NGlycan/1257.4494	23745100	N
S protein	603	HexNAc(3)Hex(4)Fuc(1)	NGlycan/1403.5073	4022270	N
S protein	603	HexNAc(3)Hex(4)Fuc(1),HexNAc(4)Hex(3)Fuc(1)	NGlycan/1403.5073	21672700	N
S protein	603	HexNAc(3)Hex(5)	NGlycan/1419.5022	104610000	N
S protein	603	HexNAc(3)Hex(5),HexNAc(4)Hex(3)	NGlycan/1419.5022	39694900	N
S protein	603	HexNAc(3)Hex(5),HexNAc(4)Hex(3)Fuc(1)	NGlycan/1419.5022	54959400	N
S protein	603	HexNAc(3)Hex(5),HexNAc(4)Hex(3)Fuc(1)	NGlycan/1419.5022	82124700	N
S protein	603	HexNAc(3)Hex(5)Fuc(1)	NGlycan/1565.5601	8171010	N
S protein	603	HexNAc(3)Hex(5)Fuc(1),HexNAc(4)Hex(3)Fuc(1)	NGlycan/1565.5601	9246970	N
S protein	603	HexNAc(3)Hex(5)Fuc(1),HexNAc(4)Hex(3)Fuc(1)	NGlycan/1565.5601	47203000	N
S protein	603	HexNAc(4)Hex(3)Fuc(1),HexNAc(4)Hex(3)Fuc(1)	NGlycan/1444.5339	13961100	N
S protein	616	HexNAc(1)	NGlycan/203.0794	16619200	N
S protein	616	HexNAc(1),HexNAc(2)Hex(1)	NGlycan/203.0794	9526550	N
S protein	616	HexNAc(1)Fuc(1)	NGlycan/349.1373	17901200	N
S protein	616	HexNAc(1)Fuc(1),HexNAc(2)Fuc(1)	NGlycan/349.1373	988738	N
S protein	616	HexNAc(1)Fuc(1),HexNAc(2)Hex(2)Fuc(1)	NGlycan/349.1373	31290400	N
S protein	616	HexNAc(2)Fuc(1),HexNAc(2)Hex(5)Fuc(1)	NGlycan/1362.4808	10775400	N
S protein	616	HexNAc(2)Fuc(1),HexNAc(4)Hex(3)	NGlycan/552.2167	913604	N
S protein	616	HexNAc(2)Hex(1)	NGlycan/568.2116	26844000	N
S protein	616	HexNAc(2)Hex(1),HexNAc(3)Hex(3)	NGlycan/568.2116	1954790	N
S protein	616	HexNAc(2)Hex(1)Fuc(1)	NGlycan/714.2695	5300730	N
S protein	616	HexNAc(2)Hex(2)	NGlycan/730.2644	7626520	N
S protein	616	HexNAc(2)Hex(2)	NGlycan/730.2644	19246600	N
S protein	616	HexNAc(2)Hex(2)	NGlycan/730.2644	153295000	N
S protein	616	HexNAc(2)Hex(2),HexNAc(3)Hex(3)	NGlycan/730.2644	22564300	N
S protein	616	HexNAc(2)Hex(2),HexNAc(3)Hex(3)Fuc(1)	NGlycan/730.2644	2865020	N
S protein	616	HexNAc(2)Hex(2)Fuc(1)	NGlycan/876.3223	7187440	N
S protein	616	HexNAc(2)Hex(2)Fuc(1)	NGlycan/876.3223	8600970	N
S protein	616	HexNAc(2)Hex(2)Fuc(1)	NGlycan/876.3223	33362300	N
S protein	616	HexNAc(2)Hex(2)Fuc(1)	NGlycan/876.3223	2094530000	N
S protein	616	HexNAc(2)Hex(2)Fuc(1),HexNAc(2)Hex(3)	NGlycan/892.3172	8437700	N
S protein	616	HexNAc(2)Hex(2)Fuc(1),HexNAc(2)Hex(4)Fuc(1)	NGlycan/1200.4279	52836400	N
S protein	616	HexNAc(2)Hex(2)Fuc(1),HexNAc(2)Hex(5)	NGlycan/876.3223	17914800	N
S protein	616	HexNAc(2)Hex(2)Fuc(1),HexNAc(2)Hex(5)	NGlycan/1216.4229	2395810	N
S protein	616	HexNAc(2)Hex(3)	NGlycan/892.3172	13699100	N
S protein	616	HexNAc(2)Hex(3)	NGlycan/892.3172	40120300	N
S protein	616	HexNAc(2)Hex(3)	NGlycan/892.3172	70983500	N
S protein	616	HexNAc(2)Hex(3)	NGlycan/892.3172	1014100000	N
S protein	616	HexNAc(2)Hex(3)Fuc(1)	NGlycan/1038.3751	17779600	N
S protein	616	HexNAc(2)Hex(3)Fuc(1)	NGlycan/1038.3751	18007200	N
S protein	616	HexNAc(2)Hex(3)Fuc(1)	NGlycan/1038.3751	52239000	N
S protein	616	HexNAc(2)Hex(3)Fuc(1)	NGlycan/1038.3751	157518000	N
S protein	616	HexNAc(2)Hex(3)Fuc(1)	NGlycan/1038.3751	409630000	N
S protein	616	HexNAc(2)Hex(3)Fuc(1)	NGlycan/1038.3751	1085340000	N
S protein	616	HexNAc(2)Hex(3)Fuc(1)	NGlycan/1038.3751	6141030000	N
S protein	616	HexNAc(2)Hex(4)	NGlycan/1054.3700	15553800	N
S protein	616	HexNAc(2)Hex(4)	NGlycan/1054.3700	171917000	N
S protein	616	HexNAc(2)Hex(4),HexNAc(4)Hex(3)Fuc(1)	NGlycan/1444.5339	10577200	N
S protein	616	HexNAc(2)Hex(4)Fuc(1)	NGlycan/1200.4279	15359000	N
S protein	616	HexNAc(2)Hex(4)Fuc(1)	NGlycan/1200.4279	19884400	N
S protein	616	HexNAc(2)Hex(4)Fuc(1)	NGlycan/1200.4279	1207180000	N
S protein	616	HexNAc(2)Hex(5)	NGlycan/1216.4229	12096700	N
S protein	616	HexNAc(2)Hex(5)	NGlycan/1216.4229	137292000	N
S protein	616	HexNAc(2)Hex(5)	NGlycan/1216.4229	683668000	N
S protein	616	HexNAc(2)Hex(5),HexNAc(4)Hex(3)Fuc(1)	NGlycan/1444.5339	17000000	N
S protein	616	HexNAc(2)Hex(5)Fuc(1)	NGlycan/1362.4808	30720400	N
S protein	616	HexNAc(2)Hex(6)	NGlycan/1378.4757	3954230	N
S protein	616	HexNAc(2)Hex(6)	NGlycan/1378.4757	10576900	N
S protein	616	HexNAc(2)Hex(6)	NGlycan/1378.4757	23764400	N
S protein	616	HexNAc(2)Hex(6)	NGlycan/1378.4757	51566500	N
S protein	616	HexNAc(2)Hex(6)	NGlycan/1378.4757	229187000	N
S protein	616	HexNAc(2)Hex(7)	NGlycan/1540.5285	7190090	N
S protein	616	HexNAc(2)Hex(7)	NGlycan/1540.5285	56672900	N
S protein	616	HexNAc(2)Hex(7)	NGlycan/1540.5285	231598000	N
S protein	616	HexNAc(2)Hex(8)	NGlycan/1702.5813	54784000	N
S protein	616	HexNAc(2)Hex(8)	NGlycan/1702.5813	194429000	N
S protein	616	HexNAc(2)Hex(8)	NGlycan/1702.5813	1181570000	N
S protein	616	HexNAc(2)Hex(9)	NGlycan/1864.6342	294988	N
S protein	616	HexNAc(2)Hex(9)	NGlycan/1864.6342	71840900	N
S protein	616	HexNAc(2)Hex(9)	NGlycan/1864.6342	164313000	N
S protein	616	HexNAc(3)Hex(3)	NGlycan/1095.3966	9478500	N
S protein	616	HexNAc(3)Hex(3)	NGlycan/1095.3966	32574500	N
S protein	616	HexNAc(3)Hex(3)	NGlycan/1095.3966	91049900	N
S protein	616	HexNAc(3)Hex(3)	NGlycan/1095.3966	538350000	N
S protein	616	HexNAc(3)Hex(3)Fuc(1)	NGlycan/1241.4545	19584600	N
S protein	616	HexNAc(3)Hex(3)Fuc(1)	NGlycan/1241.4545	56584400	N
S protein	616	HexNAc(3)Hex(3)Fuc(1)	NGlycan/1241.4545	241315000	N
S protein	616	HexNAc(3)Hex(3)Fuc(1)	NGlycan/1241.4545	1118690000	N
S protein	616	HexNAc(3)Hex(3)Fuc(1),HexNAc(4)Hex(3)Fuc(1)	NGlycan/1444.5339	5457250	N
S protein	616	HexNAc(3)Hex(4)	NGlycan/1257.4494	30975100	N
S protein	616	HexNAc(3)Hex(4)	NGlycan/1257.4494	91594900	N
S protein	616	HexNAc(3)Hex(4),HexNAc(4)Hex(3)	NGlycan/1298.4760	9537670	N
S protein	616	HexNAc(3)Hex(4),HexNAc(4)Hex(3)Fuc(1)	NGlycan/1444.5339	14466300	N
S protein	616	HexNAc(3)Hex(4),HexNAc(4)Hex(3)Fuc(1)	NGlycan/1444.5339	23745100	N
S protein	616	HexNAc(3)Hex(4)Fuc(1)	NGlycan/1403.5073	12189600	N
S protein	616	HexNAc(3)Hex(4)Fuc(1)	NGlycan/1403.5073	23818000	N
S protein	616	HexNAc(3)Hex(4)Fuc(1),HexNAc(4)Hex(3)Fuc(1)	NGlycan/1444.5339	21672700	N
S protein	616	HexNAc(3)Hex(5)	NGlycan/1419.5022	4432550	N
S protein	616	HexNAc(3)Hex(5)	NGlycan/1419.5022	9541650	N
S protein	616	HexNAc(3)Hex(5)	NGlycan/1419.5022	83607200	N
S protein	616	HexNAc(3)Hex(5),HexNAc(4)Hex(3)	NGlycan/1298.4760	39694900	N
S protein	616	HexNAc(3)Hex(5),HexNAc(4)Hex(3)Fuc(1)	NGlycan/1444.5339	54959400	N
S protein	616	HexNAc(3)Hex(5),HexNAc(4)Hex(3)Fuc(1)	NGlycan/1444.5339	82124700	N
S protein	616	HexNAc(3)Hex(5)Fuc(1)	NGlycan/1565.5601	8136270	N
S protein	616	HexNAc(3)Hex(5)Fuc(1)	NGlycan/1565.5601	49314700	N
S protein	616	HexNAc(3)Hex(5)Fuc(1),HexNAc(4)Hex(3)Fuc(1)	NGlycan/1444.5339	9246970	N
S protein	616	HexNAc(3)Hex(5)Fuc(1),HexNAc(4)Hex(3)Fuc(1)	NGlycan/1444.5339	47203000	N
S protein	616	HexNAc(4)Hex(3)	NGlycan/1298.4760	12788600	N
S protein	616	HexNAc(4)Hex(3)Fuc(1),HexNAc(4)Hex(3)Fuc(1)	NGlycan/1444.5339	13961100	N
S protein	657	HexNAc(1)	NGlycan/203.0794	14975200	N
S protein	657	HexNAc(1)Fuc(1)	NGlycan/349.1373	6269640	N
S protein	657	HexNAc(2)	NGlycan/406.1587	909851000	N
S protein	657	HexNAc(2)Hex(1)	NGlycan/568.2116	3585320	N
S protein	657	HexNAc(2)Hex(2)	NGlycan/730.2644	2872920	N
S protein	657	HexNAc(2)Hex(2)	NGlycan/730.2644	5522950	N
S protein	657	HexNAc(2)Hex(2)	NGlycan/730.2644	41497100	N
S protein	657	HexNAc(2)Hex(2)	NGlycan/730.2644	46688400	N
S protein	657	HexNAc(2)Hex(2)Fuc(1)	NGlycan/876.3223	7573950	N
S protein	657	HexNAc(2)Hex(2)Fuc(1)	NGlycan/876.3223	115049000	N
S protein	657	HexNAc(2)Hex(2)Fuc(1)	NGlycan/876.3223	287915000	N
S protein	657	HexNAc(2)Hex(3)	NGlycan/892.3172	73962900	N
S protein	657	HexNAc(2)Hex(3)	NGlycan/892.3172	74246500	N
S protein	657	HexNAc(2)Hex(3)	NGlycan/892.3172	579975000	N
S protein	657	HexNAc(2)Hex(3)Fuc(1)	NGlycan/1038.3751	11353300	N
S protein	657	HexNAc(2)Hex(3)Fuc(1)	NGlycan/1038.3751	20539000	N
S protein	657	HexNAc(2)Hex(3)Fuc(1)	NGlycan/1038.3751	594681000	N
S protein	657	HexNAc(2)Hex(3)Fuc(1)	NGlycan/1038.3751	1521670000	N
S protein	657	HexNAc(2)Hex(4)	NGlycan/1054.3700	3614320	N
S protein	657	HexNAc(2)Hex(4)	NGlycan/1054.3700	278033000	N
S protein	657	HexNAc(2)Hex(4)	NGlycan/1054.3700	1344440000	N
S protein	657	HexNAc(2)Hex(4)Fuc(1)	NGlycan/1200.4279	269553000	N
S protein	657	HexNAc(2)Hex(4)Fuc(1)	NGlycan/1200.4279	428795000	N
S protein	657	HexNAc(2)Hex(4)Fuc(1)	NGlycan/1200.4279	1805770000	N
S protein	657	HexNAc(2)Hex(5)	NGlycan/1216.4229	125940000	N
S protein	657	HexNAc(2)Hex(5)	NGlycan/1216.4229	161322000	N
S protein	657	HexNAc(2)Hex(5)Fuc(1)	NGlycan/1362.4808	2289960	N
S protein	657	HexNAc(2)Hex(5)Fuc(1)	NGlycan/1362.4808	12922300	N
S protein	657	HexNAc(2)Hex(6)	NGlycan/1378.4757	6191950	N
S protein	657	HexNAc(2)Hex(6)	NGlycan/1378.4757	20455100	N
S protein	657	HexNAc(2)Hex(7)	NGlycan/1540.5285	8379060	N
S protein	657	HexNAc(2)Hex(7)	NGlycan/1540.5285	15118100	N
S protein	657	HexNAc(2)Hex(7)	NGlycan/1540.5285	23490900	N
S protein	657	HexNAc(2)Hex(8)	NGlycan/1702.5813	15649900	N
S protein	657	HexNAc(3)Hex(3)	NGlycan/1095.3966	116044	N
S protein	657	HexNAc(3)Hex(3)	NGlycan/1095.3966	3201450	N
S protein	657	HexNAc(3)Hex(3)	NGlycan/1095.3966	12400900	N
S protein	657	HexNAc(3)Hex(3)	NGlycan/1095.3966	14137000	N
S protein	657	HexNAc(3)Hex(3)	NGlycan/1095.3966	43791400	N
S protein	657	HexNAc(3)Hex(3)Fuc(1)	NGlycan/1241.4545	6204440	N
S protein	657	HexNAc(3)Hex(3)Fuc(1)	NGlycan/1241.4545	8219380	N
S protein	657	HexNAc(3)Hex(3)Fuc(1)	NGlycan/1241.4545	40778500	N
S protein	657	HexNAc(3)Hex(3)Fuc(1)	NGlycan/1241.4545	76912900	N
S protein	657	HexNAc(3)Hex(4)	NGlycan/1257.4494	27778800	N
S protein	657	HexNAc(3)Hex(4)	NGlycan/1257.4494	96311400	N
S protein	657	HexNAc(3)Hex(4)Fuc(1)	NGlycan/1403.5073	4110350	N
S protein	657	HexNAc(3)Hex(4)Fuc(1)	NGlycan/1403.5073	15626100	N
S protein	657	HexNAc(3)Hex(4)Fuc(1)	NGlycan/1403.5073	56412700	N
S protein	657	HexNAc(3)Hex(4)Fuc(1)	NGlycan/1403.5073	66031500	N
S protein	657	HexNAc(3)Hex(4)Fuc(1)	NGlycan/1403.5073	330912000	N
S protein	657	HexNAc(3)Hex(5)	NGlycan/1419.5022	15472700	N
S protein	657	HexNAc(3)Hex(5)Fuc(1)	NGlycan/1565.5601	14842400	N
S protein	657	HexNAc(4)Hex(3)	NGlycan/1298.4760	2045990	N
S protein	657	HexNAc(4)Hex(3)	NGlycan/1298.4760	27274800	N
S protein	709	HexNAc(1),HexNAc(2)	NGlycan/203.0794	3774110	N
S protein	709	HexNAc(1),HexNAc(2)Hex(2)Fuc(1)	NGlycan/876.3223	5184990	N
S protein	709	HexNAc(1),HexNAc(2)Hex(7)	NGlycan/203.0794	4893190	N
S protein	709	HexNAc(1),HexNAc(2)Hex(9)	NGlycan/1864.6342	11444300	N
S protein	709	HexNAc(1)Fuc(1),HexNAc(2)Hex(7)	NGlycan/349.1373	11768400	N
S protein	709	HexNAc(1)Fuc(1),HexNAc(2)Hex(7)	NGlycan/1540.5285	12280000	N
S protein	709	HexNAc(1)Fuc(1),HexNAc(3)Hex(4)	NGlycan/349.1373	8052350	N
S protein	709	HexNAc(2),HexNAc(2)Hex(1)Fuc(1)	NGlycan/714.2695	50696100	N
S protein	709	HexNAc(2),HexNAc(2)Hex(2)Fuc(1)	NGlycan/406.1587	11390800	N
S protein	709	HexNAc(2),HexNAc(2)Hex(2)Fuc(1)	NGlycan/876.3223	11413200	N
S protein	709	HexNAc(2),HexNAc(2)Hex(5)Fuc(1)	NGlycan/1362.4808	49677700	N
S protein	709	HexNAc(2),HexNAc(2)Hex(7)	NGlycan/406.1587	3830760	N
S protein	709	HexNAc(2),HexNAc(2)Hex(8)	NGlycan/1702.5813	0	N
S protein	709	HexNAc(2),HexNAc(3)Hex(3)	NGlycan/406.1587	13294400	N
S protein	709	HexNAc(2),HexNAc(4)Hex(3)	NGlycan/406.1587	21139500	N
S protein	709	HexNAc(2),HexNAc(4)Hex(3)	NGlycan/1298.4760	22270500	N
S protein	709	HexNAc(2),HexNAc(4)Hex(3)Fuc(1)	NGlycan/1444.5339	322445000	N
S protein	709	HexNAc(2)Fuc(1),HexNAc(2)Hex(7)	NGlycan/1540.5285	1611390	N
S protein	709	HexNAc(2)Fuc(1),HexNAc(2)Hex(8)	NGlycan/1702.5813	214450000	N
S protein	709	HexNAc(2)Fuc(1),HexNAc(2)Hex(9)	NGlycan/1864.6342	821103000	N
S protein	709	HexNAc(2)Fuc(1),HexNAc(3)Hex(4)Fuc(1)	NGlycan/1403.5073	370910000	N
S protein	709	HexNAc(2)Fuc(1),HexNAc(4)Hex(3)Fuc(1)	NGlycan/552.2167	6755080	N
S protein	709	HexNAc(2)Fuc(1),HexNAc(4)Hex(3)Fuc(1)	NGlycan/1444.5339	22357000	N
S protein	709	HexNAc(2)Hex(1),HexNAc(2)Hex(3)	NGlycan/892.3172	5863800	N
S protein	709	HexNAc(2)Hex(1),HexNAc(2)Hex(5)	NGlycan/1216.4229	32976800	N
S protein	709	HexNAc(2)Hex(1),HexNAc(2)Hex(5)Fuc(1)	NGlycan/1362.4808	681754000	N
S protein	709	HexNAc(2)Hex(1),HexNAc(2)Hex(7)	NGlycan/1540.5285	29514200	N
S protein	709	HexNAc(2)Hex(1),HexNAc(3)Hex(5)	NGlycan/568.2116	10366600	N
S protein	709	HexNAc(2)Hex(1),HexNAc(4)Hex(3)	NGlycan/568.2116	5299140	N
S protein	709	HexNAc(2)Hex(1),HexNAc(4)Hex(3)Fuc(1)	NGlycan/568.2116	10832900	N
S protein	709	HexNAc(2)Hex(1),HexNAc(4)Hex(3)Fuc(1)	NGlycan/1444.5339	4694930	N
S protein	709	HexNAc(2)Hex(1)Fuc(1),HexNAc(2)Hex(8)	NGlycan/1702.5813	1742330	N
S protein	709	HexNAc(2)Hex(1)Fuc(1),HexNAc(3)Hex(4)	NGlycan/714.2695	213229000	N
S protein	709	HexNAc(2)Hex(1)Fuc(1),HexNAc(3)Hex(5)Fuc(1)	NGlycan/714.2695	3316730	N
S protein	709	HexNAc(2)Hex(1)Fuc(1),HexNAc(4)Hex(3)Fuc(1)	NGlycan/1444.5339	1616390	N
S protein	709	HexNAc(2)Hex(2),HexNAc(2)Hex(3)	NGlycan/892.3172	12794500	N
S protein	709	HexNAc(2)Hex(2),HexNAc(2)Hex(4)	NGlycan/730.2644	4988200	N
S protein	709	HexNAc(2)Hex(2),HexNAc(2)Hex(5)	NGlycan/1216.4229	60764700	N
S protein	709	HexNAc(2)Hex(2),HexNAc(2)Hex(5)Fuc(1)	NGlycan/730.2644	6341200	N
S protein	709	HexNAc(2)Hex(2),HexNAc(2)Hex(5)Fuc(1)	NGlycan/1362.4808	254721000	N
S protein	709	HexNAc(2)Hex(2),HexNAc(2)Hex(5)Fuc(1)	NGlycan/1362.4808	895164000	N
S protein	709	HexNAc(2)Hex(2),HexNAc(2)Hex(6)	NGlycan/1378.4757	65000800	N
S protein	709	HexNAc(2)Hex(2),HexNAc(2)Hex(8)	NGlycan/1702.5813	2363130	N
S protein	709	HexNAc(2)Hex(2),HexNAc(2)Hex(8)	NGlycan/1702.5813	1157460000	N
S protein	709	HexNAc(2)Hex(2),HexNAc(2)Hex(9)	NGlycan/1864.6342	1143070000	N
S protein	709	HexNAc(2)Hex(2),HexNAc(3)Hex(3)Fuc(1)	NGlycan/1241.4545	6977800	N
S protein	709	HexNAc(2)Hex(2),HexNAc(3)Hex(4)	NGlycan/1257.4494	6368500	N
S protein	709	HexNAc(2)Hex(2),HexNAc(3)Hex(4)	NGlycan/1257.4494	47702200	N
S protein	709	HexNAc(2)Hex(2),HexNAc(3)Hex(4)Fuc(1)	NGlycan/1403.5073	20257000	N
S protein	709	HexNAc(2)Hex(2),HexNAc(3)Hex(4)Fuc(1)	NGlycan/1403.5073	253677000	N
S protein	709	HexNAc(2)Hex(2),HexNAc(3)Hex(5)	NGlycan/730.2644	1972980	N
S protein	709	HexNAc(2)Hex(2),HexNAc(3)Hex(5)	NGlycan/1419.5022	369844000	N
S protein	709	HexNAc(2)Hex(2),HexNAc(3)Hex(5)Fuc(1)	NGlycan/1565.5601	487037000	N
S protein	709	HexNAc(2)Hex(2),HexNAc(4)Hex(3)	NGlycan/1298.4760	25913000	N
S protein	709	HexNAc(2)Hex(2),HexNAc(4)Hex(3)Fuc(1)	NGlycan/730.2644	35637400	N
S protein	709	HexNAc(2)Hex(2)Fuc(1)	NGlycan/876.3223	6073560	N
S protein	709	HexNAc(2)Hex(2)Fuc(1),HexNAc(2)Hex(4)Fuc(1)	NGlycan/1200.4279	11293200	N
S protein	709	HexNAc(2)Hex(2)Fuc(1),HexNAc(2)Hex(7)	NGlycan/876.3223	9246320	N
S protein	709	HexNAc(2)Hex(2)Fuc(1),HexNAc(2)Hex(8)	NGlycan/1702.5813	2294330	N
S protein	709	HexNAc(2)Hex(2)Fuc(1),HexNAc(3)Hex(3)Fuc(1)	NGlycan/1241.4545	766592	N
S protein	709	HexNAc(2)Hex(2)Fuc(1),HexNAc(3)Hex(4)	NGlycan/1257.4494	253677000	N
S protein	709	HexNAc(2)Hex(2)Fuc(1),HexNAc(3)Hex(5)Fuc(1)	NGlycan/876.3223	1426780	N
S protein	709	HexNAc(2)Hex(2)Fuc(1),HexNAc(4)Hex(3)Fuc(1)	NGlycan/1444.5339	24423500	N
S protein	709	HexNAc(2)Hex(3)	NGlycan/892.3172	4433530	N
S protein	709	HexNAc(2)Hex(3),HexNAc(2)Hex(3)	NGlycan/892.3172	24902500	N
S protein	709	HexNAc(2)Hex(3),HexNAc(2)Hex(3)Fuc(1)	NGlycan/1038.3751	4803370	N
S protein	709	HexNAc(2)Hex(3),HexNAc(2)Hex(3)Fuc(1)	NGlycan/1038.3751	7638820	N
S protein	709	HexNAc(2)Hex(3),HexNAc(2)Hex(3)Fuc(1)	NGlycan/1038.3751	206173000	N
S protein	709	HexNAc(2)Hex(3),HexNAc(2)Hex(4)Fuc(1)	NGlycan/1200.4279	13395600	N
S protein	709	HexNAc(2)Hex(3),HexNAc(2)Hex(5)	NGlycan/892.3172	1208430	N
S protein	709	HexNAc(2)Hex(3),HexNAc(2)Hex(7)	NGlycan/892.3172	59312300	N
S protein	709	HexNAc(2)Hex(3),HexNAc(2)Hex(7)	NGlycan/1540.5285	99091800	N
S protein	709	HexNAc(2)Hex(3),HexNAc(2)Hex(8)	NGlycan/1702.5813	14997900	N
S protein	709	HexNAc(2)Hex(3),HexNAc(3)Hex(4)	NGlycan/892.3172	5435030	N
S protein	709	HexNAc(2)Hex(3),HexNAc(3)Hex(5)	NGlycan/892.3172	10414700	N
S protein	709	HexNAc(2)Hex(3),HexNAc(3)Hex(5)	NGlycan/1419.5022	910719	N
S protein	709	HexNAc(2)Hex(3),HexNAc(3)Hex(5)	NGlycan/1419.5022	10937100	N
S protein	709	HexNAc(2)Hex(3),HexNAc(3)Hex(5)	NGlycan/1419.5022	54261600	N
S protein	709	HexNAc(2)Hex(3),HexNAc(3)Hex(5)Fuc(1)	NGlycan/1565.5601	14368700	N
S protein	709	HexNAc(2)Hex(3),HexNAc(4)Hex(3)	NGlycan/1298.4760	49123600	N
S protein	709	HexNAc(2)Hex(3)Fuc(1),HexNAc(2)Hex(5)	NGlycan/1038.3751	17198900	N
S protein	709	HexNAc(2)Hex(3)Fuc(1),HexNAc(2)Hex(5)	NGlycan/1038.3751	214450000	N
S protein	709	HexNAc(2)Hex(3)Fuc(1),HexNAc(2)Hex(5)	NGlycan/1216.4229	16473300	N
S protein	709	HexNAc(2)Hex(3)Fuc(1),HexNAc(2)Hex(6)	NGlycan/1038.3751	62337100	N
S protein	709	HexNAc(2)Hex(3)Fuc(1),HexNAc(2)Hex(7)	NGlycan/1038.3751	57436800	N
S protein	709	HexNAc(2)Hex(3)Fuc(1),HexNAc(2)Hex(7)	NGlycan/1038.3751	196077000	N
S protein	709	HexNAc(2)Hex(3)Fuc(1),HexNAc(2)Hex(8)	NGlycan/1702.5813	7729610	N
S protein	709	HexNAc(2)Hex(3)Fuc(1),HexNAc(2)Hex(8)	NGlycan/1702.5813	17977100	N
S protein	709	HexNAc(2)Hex(4),HexNAc(2)Hex(5)	NGlycan/1054.3700	38174800	N
S protein	709	HexNAc(2)Hex(4),HexNAc(2)Hex(5)Fuc(1)	NGlycan/1362.4808	821103000	N
S protein	709	HexNAc(2)Hex(4),HexNAc(2)Hex(8)	NGlycan/1702.5813	19810100	N
S protein	709	HexNAc(2)Hex(4),HexNAc(3)Hex(4)Fuc(1)	NGlycan/1403.5073	6164440	N
S protein	709	HexNAc(2)Hex(4),HexNAc(3)Hex(4)Fuc(1)	NGlycan/1403.5073	364495000	N
S protein	709	HexNAc(2)Hex(4),HexNAc(3)Hex(5)	NGlycan/1419.5022	80130600	N
S protein	709	HexNAc(2)Hex(4),HexNAc(3)Hex(5)Fuc(1)	NGlycan/1565.5601	13699400	N
S protein	709	HexNAc(2)Hex(4),HexNAc(3)Hex(5)Fuc(1)	NGlycan/1565.5601	17994300	N
S protein	709	HexNAc(2)Hex(4),HexNAc(3)Hex(5)Fuc(1)	NGlycan/1565.5601	347170000	N
S protein	709	HexNAc(2)Hex(4),HexNAc(4)Hex(3)	NGlycan/1298.4760	3564490	N
S protein	709	HexNAc(2)Hex(4),HexNAc(4)Hex(3)Fuc(1)	NGlycan/1054.3700	7592210	N
S protein	709	HexNAc(2)Hex(4),HexNAc(4)Hex(3)Fuc(1)	NGlycan/1054.3700	16766600	N
S protein	709	HexNAc(2)Hex(4)Fuc(1),HexNAc(2)Hex(5)Fuc(1)	NGlycan/1200.4279	3587370	N
S protein	709	HexNAc(2)Hex(4)Fuc(1),HexNAc(2)Hex(6)	NGlycan/1200.4279	6575480	N
S protein	709	HexNAc(2)Hex(4)Fuc(1),HexNAc(2)Hex(7)	NGlycan/1540.5285	455727000	N
S protein	709	HexNAc(2)Hex(4)Fuc(1),HexNAc(2)Hex(8)	NGlycan/1702.5813	19056400	N
S protein	709	HexNAc(2)Hex(4)Fuc(1),HexNAc(2)Hex(8)	NGlycan/1702.5813	32158100	N
S protein	709	HexNAc(2)Hex(4)Fuc(1),HexNAc(2)Hex(8)	NGlycan/1702.5813	88151800	N
S protein	709	HexNAc(2)Hex(5),HexNAc(2)Hex(5)	NGlycan/1216.4229	7211510	N
S protein	709	HexNAc(2)Hex(5),HexNAc(2)Hex(5)Fuc(1)	NGlycan/1362.4808	1146570000	N
S protein	709	HexNAc(2)Hex(5),HexNAc(2)Hex(8)	NGlycan/1702.5813	3524630	N
S protein	709	HexNAc(2)Hex(5),HexNAc(2)Hex(8)	NGlycan/1702.5813	38518700	N
S protein	709	HexNAc(2)Hex(5),HexNAc(2)Hex(8)	NGlycan/1702.5813	52965000	N
S protein	709	HexNAc(2)Hex(5),HexNAc(3)Hex(5)	NGlycan/1419.5022	307505000	N
S protein	709	HexNAc(2)Hex(5),HexNAc(3)Hex(5)Fuc(1)	NGlycan/1565.5601	96548300	N
S protein	709	HexNAc(2)Hex(5),HexNAc(4)Hex(3)	NGlycan/1216.4229	10160300	N
S protein	709	HexNAc(2)Hex(5),HexNAc(4)Hex(3)	NGlycan/1216.4229	521400000	N
S protein	709	HexNAc(2)Hex(5)Fuc(1),HexNAc(2)Hex(6)	NGlycan/1362.4808	455727000	N
S protein	709	HexNAc(2)Hex(5)Fuc(1),HexNAc(2)Hex(7)	NGlycan/1540.5285	88151800	N
S protein	709	HexNAc(2)Hex(5)Fuc(1),HexNAc(2)Hex(8)	NGlycan/1702.5813	44681400	N
S protein	709	HexNAc(2)Hex(5)Fuc(1),HexNAc(2)Hex(9)	NGlycan/1864.6342	14361300	N
S protein	709	HexNAc(2)Hex(6),HexNAc(2)Hex(6)	NGlycan/1378.4757	14335500	N
S protein	709	HexNAc(2)Hex(6),HexNAc(3)Hex(5)	NGlycan/1419.5022	5084200	N
S protein	709	HexNAc(2)Hex(6),HexNAc(3)Hex(5)Fuc(1)	NGlycan/1378.4757	25124100	N
S protein	709	HexNAc(2)Hex(6),HexNAc(4)Hex(3)	NGlycan/1378.4757	25438800	N
S protein	709	HexNAc(2)Hex(7),HexNAc(2)Hex(7)	NGlycan/1540.5285	36622600	N
S protein	709	HexNAc(2)Hex(7),HexNAc(3)Hex(3)	NGlycan/1095.3966	3691610	N
S protein	709	HexNAc(2)Hex(7),HexNAc(3)Hex(3)Fuc(1)	NGlycan/1540.5285	19363900	N
S protein	709	HexNAc(2)Hex(7),HexNAc(4)Hex(3)	NGlycan/1298.4760	8817630	N
S protein	709	HexNAc(2)Hex(8),HexNAc(2)Hex(9)	NGlycan/1702.5813	7615150	N
S protein	709	HexNAc(2)Hex(8),HexNAc(3)Hex(3)	NGlycan/1095.3966	13249000	N
S protein	709	HexNAc(2)Hex(8),HexNAc(3)Hex(4)	NGlycan/1702.5813	21072900	N
S protein	709	HexNAc(2)Hex(8),HexNAc(3)Hex(5)	NGlycan/1702.5813	13575000	N
S protein	709	HexNAc(2)Hex(8),HexNAc(3)Hex(5)Fuc(1)	NGlycan/1702.5813	6082000	N
S protein	709	HexNAc(2)Hex(8),HexNAc(4)Hex(3)Fuc(1)	NGlycan/1444.5339	6042650	N
S protein	709	HexNAc(2)Hex(8),HexNAc(4)Hex(3)Fuc(1)	NGlycan/1702.5813	1635490	N
S protein	709	HexNAc(2)Hex(9),HexNAc(3)Hex(3)	NGlycan/1095.3966	5250360	N
S protein	709	HexNAc(2)Hex(9),HexNAc(3)Hex(5)Fuc(1)	NGlycan/1864.6342	8607850	N
S protein	709	HexNAc(2)Hex(9),HexNAc(4)Hex(3)	NGlycan/1298.4760	783515	N
S protein	709	HexNAc(2)Hex(9),HexNAc(4)Hex(3)	NGlycan/1298.4760	5981510	N
S protein	709	HexNAc(2)Hex(9),HexNAc(4)Hex(3)Fuc(1)	NGlycan/1444.5339	7124570	N
S protein	709	HexNAc(3)Hex(3),HexNAc(3)Hex(3)	NGlycan/1095.3966	6358440	N
S protein	709	HexNAc(3)Hex(3),HexNAc(3)Hex(5)	NGlycan/1419.5022	11216400	N
S protein	709	HexNAc(3)Hex(3),HexNAc(3)Hex(5)	NGlycan/1419.5022	13784200	N
S protein	709	HexNAc(3)Hex(3),HexNAc(3)Hex(5)	NGlycan/1419.5022	21658600	N
S protein	709	HexNAc(3)Hex(3),HexNAc(4)Hex(3)	NGlycan/1095.3966	113775000	N
S protein	709	HexNAc(3)Hex(3),HexNAc(4)Hex(3)Fuc(1)	NGlycan/1095.3966	2807950	N
S protein	709	HexNAc(3)Hex(3),HexNAc(4)Hex(3)Fuc(1)	NGlycan/1095.3966	113191000	N
S protein	709	HexNAc(3)Hex(3)Fuc(1)	NGlycan/1241.4545	81602700	N
S protein	709	HexNAc(3)Hex(3)Fuc(1),HexNAc(3)Hex(4)	NGlycan/1241.4545	30950600	N
S protein	709	HexNAc(3)Hex(3)Fuc(1),HexNAc(3)Hex(4)	NGlycan/1257.4494	2127000	N
S protein	709	HexNAc(3)Hex(3)Fuc(1),HexNAc(4)Hex(3)Fuc(1)	NGlycan/1241.4545	173295000	N
S protein	709	HexNAc(3)Hex(4)	NGlycan/1257.4494	787104	N
S protein	709	HexNAc(3)Hex(4),HexNAc(3)Hex(5)	NGlycan/1257.4494	15007000	N
S protein	709	HexNAc(3)Hex(4),HexNAc(3)Hex(5)Fuc(1)	NGlycan/1565.5601	7572910	N
S protein	709	HexNAc(3)Hex(4),HexNAc(4)Hex(3)	NGlycan/1298.4760	3043350	N
S protein	709	HexNAc(3)Hex(4),HexNAc(4)Hex(3)	NGlycan/1298.4760	40499500	N
S protein	709	HexNAc(3)Hex(4),HexNAc(4)Hex(3)Fuc(1)	NGlycan/1257.4494	5643250	N
S protein	709	HexNAc(3)Hex(4)Fuc(1),HexNAc(3)Hex(5)	NGlycan/1403.5073	10585100	N
S protein	709	HexNAc(3)Hex(5),HexNAc(4)Hex(3)	NGlycan/1298.4760	1525350	N
S protein	709	HexNAc(3)Hex(5),HexNAc(4)Hex(3)	NGlycan/1298.4760	22499900	N
S protein	709	HexNAc(3)Hex(5),HexNAc(4)Hex(3)	NGlycan/1419.5022	21575300	N
S protein	709	HexNAc(3)Hex(5)Fuc(1),HexNAc(4)Hex(3)	NGlycan/1565.5601	16944700	N
S protein	709	HexNAc(4)Hex(3),HexNAc(4)Hex(3)	NGlycan/1298.4760	5814950	N
S protein	709	HexNAc(4)Hex(3),HexNAc(4)Hex(3)	NGlycan/1298.4760	20303900	N
S protein	709	HexNAc(4)Hex(3),HexNAc(4)Hex(3)	NGlycan/1298.4760	34149400	N
S protein	709	HexNAc(4)Hex(3),HexNAc(4)Hex(3)	NGlycan/1298.4760	177960000	N
S protein	709	HexNAc(4)Hex(3),HexNAc(4)Hex(3)Fuc(1)	NGlycan/1298.4760	11444800	N
S protein	709	HexNAc(4)Hex(3)Fuc(1)	NGlycan/1444.5339	5737130	N
S protein	709	HexNAc(4)Hex(3)Fuc(1)	NGlycan/1444.5339	17827400	N
S protein	709	HexNAc(4)Hex(3)Fuc(1),HexNAc(4)Hex(3)Fuc(1)	NGlycan/1444.5339	88485600	N
S protein	717	HexNAc(1),HexNAc(2)	NGlycan/406.1587	3774110	N
S protein	717	HexNAc(1),HexNAc(2)Hex(2)Fuc(1)	NGlycan/203.0794	5184990	N
S protein	717	HexNAc(1),HexNAc(2)Hex(7)	NGlycan/1540.5285	4893190	N
S protein	717	HexNAc(1),HexNAc(2)Hex(9)	NGlycan/203.0794	11444300	N
S protein	717	HexNAc(1)Fuc(1),HexNAc(2)Hex(7)	NGlycan/349.1373	12280000	N
S protein	717	HexNAc(1)Fuc(1),HexNAc(2)Hex(7)	NGlycan/1540.5285	11768400	N
S protein	717	HexNAc(1)Fuc(1),HexNAc(3)Hex(4)	NGlycan/1257.4494	8052350	N
S protein	717	HexNAc(2),HexNAc(2)Hex(1)Fuc(1)	NGlycan/406.1587	50696100	N
S protein	717	HexNAc(2),HexNAc(2)Hex(2)Fuc(1)	NGlycan/406.1587	11413200	N
S protein	717	HexNAc(2),HexNAc(2)Hex(2)Fuc(1)	NGlycan/876.3223	11390800	N
S protein	717	HexNAc(2),HexNAc(2)Hex(5)Fuc(1)	NGlycan/406.1587	49677700	N
S protein	717	HexNAc(2),HexNAc(2)Hex(7)	NGlycan/1540.5285	3830760	N
S protein	717	HexNAc(2),HexNAc(2)Hex(8)	NGlycan/406.1587	0	N
S protein	717	HexNAc(2),HexNAc(3)Hex(3)	NGlycan/1095.3966	13294400	N
S protein	717	HexNAc(2),HexNAc(4)Hex(3)	NGlycan/406.1587	22270500	N
S protein	717	HexNAc(2),HexNAc(4)Hex(3)	NGlycan/1298.4760	21139500	N
S protein	717	HexNAc(2),HexNAc(4)Hex(3)Fuc(1)	NGlycan/406.1587	322445000	N
S protein	717	HexNAc(2)Fuc(1),HexNAc(2)Hex(7)	NGlycan/552.2167	1611390	N
S protein	717	HexNAc(2)Fuc(1),HexNAc(2)Hex(8)	NGlycan/552.2167	214450000	N
S protein	717	HexNAc(2)Fuc(1),HexNAc(2)Hex(9)	NGlycan/552.2167	821103000	N
S protein	717	HexNAc(2)Fuc(1),HexNAc(3)Hex(4)Fuc(1)	NGlycan/552.2167	370910000	N
S protein	717	HexNAc(2)Fuc(1),HexNAc(4)Hex(3)Fuc(1)	NGlycan/552.2167	22357000	N
S protein	717	HexNAc(2)Fuc(1),HexNAc(4)Hex(3)Fuc(1)	NGlycan/1444.5339	6755080	N
S protein	717	HexNAc(2)Hex(1),HexNAc(2)Hex(3)	NGlycan/568.2116	5863800	N
S protein	717	HexNAc(2)Hex(1),HexNAc(2)Hex(5)	NGlycan/568.2116	32976800	N
S protein	717	HexNAc(2)Hex(1),HexNAc(2)Hex(5)Fuc(1)	NGlycan/568.2116	681754000	N
S protein	717	HexNAc(2)Hex(1),HexNAc(2)Hex(7)	NGlycan/568.2116	29514200	N
S protein	717	HexNAc(2)Hex(1),HexNAc(3)Hex(5)	NGlycan/1419.5022	10366600	N
S protein	717	HexNAc(2)Hex(1),HexNAc(4)Hex(3)	NGlycan/1298.4760	5299140	N
S protein	717	HexNAc(2)Hex(1),HexNAc(4)Hex(3)Fuc(1)	NGlycan/568.2116	4694930	N
S protein	717	HexNAc(2)Hex(1),HexNAc(4)Hex(3)Fuc(1)	NGlycan/1444.5339	10832900	N
S protein	717	HexNAc(2)Hex(1)Fuc(1),HexNAc(2)Hex(8)	NGlycan/714.2695	1742330	N
S protein	717	HexNAc(2)Hex(1)Fuc(1),HexNAc(3)Hex(4)	NGlycan/1257.4494	213229000	N
S protein	717	HexNAc(2)Hex(1)Fuc(1),HexNAc(3)Hex(5)Fuc(1)	NGlycan/1565.5601	3316730	N
S protein	717	HexNAc(2)Hex(1)Fuc(1),HexNAc(4)Hex(3)Fuc(1)	NGlycan/714.2695	1616390	N
S protein	717	HexNAc(2)Hex(2),HexNAc(2)Hex(3)	NGlycan/730.2644	12794500	N
S protein	717	HexNAc(2)Hex(2),HexNAc(2)Hex(4)	NGlycan/1054.3700	4988200	N
S protein	717	HexNAc(2)Hex(2),HexNAc(2)Hex(5)	NGlycan/730.2644	60764700	N
S protein	717	HexNAc(2)Hex(2),HexNAc(2)Hex(5)Fuc(1)	NGlycan/730.2644	254721000	N
S protein	717	HexNAc(2)Hex(2),HexNAc(2)Hex(5)Fuc(1)	NGlycan/730.2644	895164000	N
S protein	717	HexNAc(2)Hex(2),HexNAc(2)Hex(5)Fuc(1)	NGlycan/1362.4808	6341200	N
S protein	717	HexNAc(2)Hex(2),HexNAc(2)Hex(6)	NGlycan/730.2644	65000800	N
S protein	717	HexNAc(2)Hex(2),HexNAc(2)Hex(8)	NGlycan/730.2644	2363130	N
S protein	717	HexNAc(2)Hex(2),HexNAc(2)Hex(8)	NGlycan/730.2644	1157460000	N
S protein	717	HexNAc(2)Hex(2),HexNAc(2)Hex(9)	NGlycan/730.2644	1143070000	N
S protein	717	HexNAc(2)Hex(2),HexNAc(3)Hex(3)Fuc(1)	NGlycan/730.2644	6977800	N
S protein	717	HexNAc(2)Hex(2),HexNAc(3)Hex(4)	NGlycan/730.2644	6368500	N
S protein	717	HexNAc(2)Hex(2),HexNAc(3)Hex(4)	NGlycan/730.2644	47702200	N
S protein	717	HexNAc(2)Hex(2),HexNAc(3)Hex(4)Fuc(1)	NGlycan/730.2644	20257000	N
S protein	717	HexNAc(2)Hex(2),HexNAc(3)Hex(4)Fuc(1)	NGlycan/730.2644	253677000	N
S protein	717	HexNAc(2)Hex(2),HexNAc(3)Hex(5)	NGlycan/730.2644	369844000	N
S protein	717	HexNAc(2)Hex(2),HexNAc(3)Hex(5)	NGlycan/1419.5022	1972980	N
S protein	717	HexNAc(2)Hex(2),HexNAc(3)Hex(5)Fuc(1)	NGlycan/730.2644	487037000	N
S protein	717	HexNAc(2)Hex(2),HexNAc(4)Hex(3)	NGlycan/730.2644	25913000	N
S protein	717	HexNAc(2)Hex(2),HexNAc(4)Hex(3)Fuc(1)	NGlycan/1444.5339	35637400	N
S protein	717	HexNAc(2)Hex(2)Fuc(1),HexNAc(2)Hex(4)Fuc(1)	NGlycan/876.3223	11293200	N
S protein	717	HexNAc(2)Hex(2)Fuc(1),HexNAc(2)Hex(7)	NGlycan/1540.5285	9246320	N
S protein	717	HexNAc(2)Hex(2)Fuc(1),HexNAc(2)Hex(8)	NGlycan/876.3223	2294330	N
S protein	717	HexNAc(2)Hex(2)Fuc(1),HexNAc(3)Hex(3)Fuc(1)	NGlycan/876.3223	766592	N
S protein	717	HexNAc(2)Hex(2)Fuc(1),HexNAc(3)Hex(4)	NGlycan/876.3223	253677000	N
S protein	717	HexNAc(2)Hex(2)Fuc(1),HexNAc(3)Hex(5)Fuc(1)	NGlycan/1565.5601	1426780	N
S protein	717	HexNAc(2)Hex(2)Fuc(1),HexNAc(4)Hex(3)Fuc(1)	NGlycan/876.3223	24423500	N
S protein	717	HexNAc(2)Hex(3)	NGlycan/892.3172	6613140	N
S protein	717	HexNAc(2)Hex(3),HexNAc(2)Hex(3)	NGlycan/892.3172	24902500	N
S protein	717	HexNAc(2)Hex(3),HexNAc(2)Hex(3)Fuc(1)	NGlycan/892.3172	4803370	N
S protein	717	HexNAc(2)Hex(3),HexNAc(2)Hex(3)Fuc(1)	NGlycan/892.3172	7638820	N
S protein	717	HexNAc(2)Hex(3),HexNAc(2)Hex(3)Fuc(1)	NGlycan/892.3172	206173000	N
S protein	717	HexNAc(2)Hex(3),HexNAc(2)Hex(4)Fuc(1)	NGlycan/892.3172	13395600	N
S protein	717	HexNAc(2)Hex(3),HexNAc(2)Hex(5)	NGlycan/1216.4229	1208430	N
S protein	717	HexNAc(2)Hex(3),HexNAc(2)Hex(7)	NGlycan/892.3172	99091800	N
S protein	717	HexNAc(2)Hex(3),HexNAc(2)Hex(7)	NGlycan/1540.5285	59312300	N
S protein	717	HexNAc(2)Hex(3),HexNAc(2)Hex(8)	NGlycan/892.3172	14997900	N
S protein	717	HexNAc(2)Hex(3),HexNAc(3)Hex(4)	NGlycan/1257.4494	5435030	N
S protein	717	HexNAc(2)Hex(3),HexNAc(3)Hex(5)	NGlycan/892.3172	910719	N
S protein	717	HexNAc(2)Hex(3),HexNAc(3)Hex(5)	NGlycan/892.3172	10937100	N
S protein	717	HexNAc(2)Hex(3),HexNAc(3)Hex(5)	NGlycan/892.3172	54261600	N
S protein	717	HexNAc(2)Hex(3),HexNAc(3)Hex(5)	NGlycan/1419.5022	10414700	N
S protein	717	HexNAc(2)Hex(3),HexNAc(3)Hex(5)Fuc(1)	NGlycan/892.3172	14368700	N
S protein	717	HexNAc(2)Hex(3),HexNAc(4)Hex(3)	NGlycan/892.3172	49123600	N
S protein	717	HexNAc(2)Hex(3)Fuc(1),HexNAc(2)Hex(5)	NGlycan/1038.3751	16473300	N
S protein	717	HexNAc(2)Hex(3)Fuc(1),HexNAc(2)Hex(5)	NGlycan/1216.4229	17198900	N
S protein	717	HexNAc(2)Hex(3)Fuc(1),HexNAc(2)Hex(5)	NGlycan/1216.4229	214450000	N
S protein	717	HexNAc(2)Hex(3)Fuc(1),HexNAc(2)Hex(6)	NGlycan/1378.4757	62337100	N
S protein	717	HexNAc(2)Hex(3)Fuc(1),HexNAc(2)Hex(7)	NGlycan/1540.5285	57436800	N
S protein	717	HexNAc(2)Hex(3)Fuc(1),HexNAc(2)Hex(7)	NGlycan/1540.5285	196077000	N
S protein	717	HexNAc(2)Hex(3)Fuc(1),HexNAc(2)Hex(8)	NGlycan/1038.3751	7729610	N
S protein	717	HexNAc(2)Hex(3)Fuc(1),HexNAc(2)Hex(8)	NGlycan/1038.3751	17977100	N
S protein	717	HexNAc(2)Hex(4)	NGlycan/1054.3700	8146000	N
S protein	717	HexNAc(2)Hex(4),HexNAc(2)Hex(5)	NGlycan/1216.4229	38174800	N
S protein	717	HexNAc(2)Hex(4),HexNAc(2)Hex(5)Fuc(1)	NGlycan/1054.3700	821103000	N
S protein	717	HexNAc(2)Hex(4),HexNAc(2)Hex(8)	NGlycan/1054.3700	19810100	N
S protein	717	HexNAc(2)Hex(4),HexNAc(3)Hex(4)Fuc(1)	NGlycan/1054.3700	6164440	N
S protein	717	HexNAc(2)Hex(4),HexNAc(3)Hex(4)Fuc(1)	NGlycan/1054.3700	364495000	N
S protein	717	HexNAc(2)Hex(4),HexNAc(3)Hex(5)	NGlycan/1054.3700	80130600	N
S protein	717	HexNAc(2)Hex(4),HexNAc(3)Hex(5)Fuc(1)	NGlycan/1054.3700	13699400	N
S protein	717	HexNAc(2)Hex(4),HexNAc(3)Hex(5)Fuc(1)	NGlycan/1054.3700	17994300	N
S protein	717	HexNAc(2)Hex(4),HexNAc(3)Hex(5)Fuc(1)	NGlycan/1054.3700	347170000	N
S protein	717	HexNAc(2)Hex(4),HexNAc(4)Hex(3)	NGlycan/1054.3700	3564490	N
S protein	717	HexNAc(2)Hex(4),HexNAc(4)Hex(3)Fuc(1)	NGlycan/1444.5339	7592210	N
S protein	717	HexNAc(2)Hex(4),HexNAc(4)Hex(3)Fuc(1)	NGlycan/1444.5339	16766600	N
S protein	717	HexNAc(2)Hex(4)Fuc(1)	NGlycan/1200.4279	12539800	N
S protein	717	HexNAc(2)Hex(4)Fuc(1),HexNAc(2)Hex(5)Fuc(1)	NGlycan/1362.4808	3587370	N
S protein	717	HexNAc(2)Hex(4)Fuc(1),HexNAc(2)Hex(6)	NGlycan/1378.4757	6575480	N
S protein	717	HexNAc(2)Hex(4)Fuc(1),HexNAc(2)Hex(7)	NGlycan/1200.4279	455727000	N
S protein	717	HexNAc(2)Hex(4)Fuc(1),HexNAc(2)Hex(8)	NGlycan/1200.4279	19056400	N
S protein	717	HexNAc(2)Hex(4)Fuc(1),HexNAc(2)Hex(8)	NGlycan/1200.4279	32158100	N
S protein	717	HexNAc(2)Hex(4)Fuc(1),HexNAc(2)Hex(8)	NGlycan/1200.4279	88151800	N
S protein	717	HexNAc(2)Hex(5),HexNAc(2)Hex(5)	NGlycan/1216.4229	7211510	N
S protein	717	HexNAc(2)Hex(5),HexNAc(2)Hex(5)Fuc(1)	NGlycan/1216.4229	1146570000	N
S protein	717	HexNAc(2)Hex(5),HexNAc(2)Hex(8)	NGlycan/1216.4229	3524630	N
S protein	717	HexNAc(2)Hex(5),HexNAc(2)Hex(8)	NGlycan/1216.4229	38518700	N
S protein	717	HexNAc(2)Hex(5),HexNAc(2)Hex(8)	NGlycan/1216.4229	52965000	N
S protein	717	HexNAc(2)Hex(5),HexNAc(3)Hex(5)	NGlycan/1216.4229	307505000	N
S protein	717	HexNAc(2)Hex(5),HexNAc(3)Hex(5)Fuc(1)	NGlycan/1216.4229	96548300	N
S protein	717	HexNAc(2)Hex(5),HexNAc(4)Hex(3)	NGlycan/1298.4760	10160300	N
S protein	717	HexNAc(2)Hex(5),HexNAc(4)Hex(3)	NGlycan/1298.4760	521400000	N
S protein	717	HexNAc(2)Hex(5)Fuc(1),HexNAc(2)Hex(6)	NGlycan/1378.4757	455727000	N
S protein	717	HexNAc(2)Hex(5)Fuc(1),HexNAc(2)Hex(7)	NGlycan/1362.4808	88151800	N
S protein	717	HexNAc(2)Hex(5)Fuc(1),HexNAc(2)Hex(8)	NGlycan/1362.4808	44681400	N
S protein	717	HexNAc(2)Hex(5)Fuc(1),HexNAc(2)Hex(9)	NGlycan/1362.4808	14361300	N
S protein	717	HexNAc(2)Hex(6),HexNAc(2)Hex(6)	NGlycan/1378.4757	14335500	N
S protein	717	HexNAc(2)Hex(6),HexNAc(3)Hex(5)	NGlycan/1378.4757	5084200	N
S protein	717	HexNAc(2)Hex(6),HexNAc(3)Hex(5)Fuc(1)	NGlycan/1565.5601	25124100	N
S protein	717	HexNAc(2)Hex(6),HexNAc(4)Hex(3)	NGlycan/1298.4760	25438800	N
S protein	717	HexNAc(2)Hex(7),HexNAc(2)Hex(7)	NGlycan/1540.5285	36622600	N
S protein	717	HexNAc(2)Hex(7),HexNAc(3)Hex(3)	NGlycan/1540.5285	3691610	N
S protein	717	HexNAc(2)Hex(7),HexNAc(3)Hex(3)Fuc(1)	NGlycan/1241.4545	19363900	N
S protein	717	HexNAc(2)Hex(7),HexNAc(4)Hex(3)	NGlycan/1540.5285	8817630	N
S protein	717	HexNAc(2)Hex(8),HexNAc(2)Hex(9)	NGlycan/1864.6342	7615150	N
S protein	717	HexNAc(2)Hex(8),HexNAc(3)Hex(3)	NGlycan/1702.5813	13249000	N
S protein	717	HexNAc(2)Hex(8),HexNAc(3)Hex(4)	NGlycan/1257.4494	21072900	N
S protein	717	HexNAc(2)Hex(8),HexNAc(3)Hex(5)	NGlycan/1419.5022	13575000	N
S protein	717	HexNAc(2)Hex(8),HexNAc(3)Hex(5)Fuc(1)	NGlycan/1565.5601	6082000	N
S protein	717	HexNAc(2)Hex(8),HexNAc(4)Hex(3)Fuc(1)	NGlycan/1444.5339	1635490	N
S protein	717	HexNAc(2)Hex(8),HexNAc(4)Hex(3)Fuc(1)	NGlycan/1702.5813	6042650	N
S protein	717	HexNAc(2)Hex(9),HexNAc(3)Hex(3)	NGlycan/1864.6342	5250360	N
S protein	717	HexNAc(2)Hex(9),HexNAc(3)Hex(5)Fuc(1)	NGlycan/1565.5601	8607850	N
S protein	717	HexNAc(2)Hex(9),HexNAc(4)Hex(3)	NGlycan/1864.6342	783515	N
S protein	717	HexNAc(2)Hex(9),HexNAc(4)Hex(3)	NGlycan/1864.6342	5981510	N
S protein	717	HexNAc(2)Hex(9),HexNAc(4)Hex(3)Fuc(1)	NGlycan/1864.6342	7124570	N
S protein	717	HexNAc(3)Hex(3)	NGlycan/1095.3966	6153320	N
S protein	717	HexNAc(3)Hex(3),HexNAc(3)Hex(3)	NGlycan/1095.3966	6358440	N
S protein	717	HexNAc(3)Hex(3),HexNAc(3)Hex(5)	NGlycan/1095.3966	11216400	N
S protein	717	HexNAc(3)Hex(3),HexNAc(3)Hex(5)	NGlycan/1095.3966	13784200	N
S protein	717	HexNAc(3)Hex(3),HexNAc(3)Hex(5)	NGlycan/1095.3966	21658600	N
S protein	717	HexNAc(3)Hex(3),HexNAc(4)Hex(3)	NGlycan/1298.4760	113775000	N
S protein	717	HexNAc(3)Hex(3),HexNAc(4)Hex(3)Fuc(1)	NGlycan/1444.5339	2807950	N
S protein	717	HexNAc(3)Hex(3),HexNAc(4)Hex(3)Fuc(1)	NGlycan/1444.5339	113191000	N
S protein	717	HexNAc(3)Hex(3)Fuc(1),HexNAc(3)Hex(4)	NGlycan/1241.4545	2127000	N
S protein	717	HexNAc(3)Hex(3)Fuc(1),HexNAc(3)Hex(4)	NGlycan/1257.4494	30950600	N
S protein	717	HexNAc(3)Hex(3)Fuc(1),HexNAc(4)Hex(3)Fuc(1)	NGlycan/1444.5339	173295000	N
S protein	717	HexNAc(3)Hex(4),HexNAc(3)Hex(5)	NGlycan/1419.5022	15007000	N
S protein	717	HexNAc(3)Hex(4),HexNAc(3)Hex(5)Fuc(1)	NGlycan/1257.4494	7572910	N
S protein	717	HexNAc(3)Hex(4),HexNAc(4)Hex(3)	NGlycan/1257.4494	3043350	N
S protein	717	HexNAc(3)Hex(4),HexNAc(4)Hex(3)	NGlycan/1257.4494	40499500	N
S protein	717	HexNAc(3)Hex(4),HexNAc(4)Hex(3)Fuc(1)	NGlycan/1444.5339	5643250	N
S protein	717	HexNAc(3)Hex(4)Fuc(1)	NGlycan/1403.5073	226477000	N
S protein	717	HexNAc(3)Hex(4)Fuc(1),HexNAc(3)Hex(5)	NGlycan/1419.5022	10585100	N
S protein	717	HexNAc(3)Hex(5)	NGlycan/1419.5022	15498400	N
S protein	717	HexNAc(3)Hex(5),HexNAc(4)Hex(3)	NGlycan/1298.4760	21575300	N
S protein	717	HexNAc(3)Hex(5),HexNAc(4)Hex(3)	NGlycan/1419.5022	1525350	N
S protein	717	HexNAc(3)Hex(5),HexNAc(4)Hex(3)	NGlycan/1419.5022	22499900	N
S protein	717	HexNAc(3)Hex(5)Fuc(1),HexNAc(4)Hex(3)	NGlycan/1298.4760	16944700	N
S protein	717	HexNAc(4)Hex(3)	NGlycan/1298.4760	4296570	N
S protein	717	HexNAc(4)Hex(3),HexNAc(4)Hex(3)	NGlycan/1298.4760	5814950	N
S protein	717	HexNAc(4)Hex(3),HexNAc(4)Hex(3)	NGlycan/1298.4760	20303900	N
S protein	717	HexNAc(4)Hex(3),HexNAc(4)Hex(3)	NGlycan/1298.4760	34149400	N
S protein	717	HexNAc(4)Hex(3),HexNAc(4)Hex(3)	NGlycan/1298.4760	177960000	N
S protein	717	HexNAc(4)Hex(3),HexNAc(4)Hex(3)Fuc(1)	NGlycan/1444.5339	11444800	N
S protein	717	HexNAc(4)Hex(3)Fuc(1),HexNAc(4)Hex(3)Fuc(1)	NGlycan/1444.5339	88485600	N
S protein	801	HexNAc(1)	NGlycan/203.0794	27813400	N
S protein	801	HexNAc(1)	NGlycan/203.0794	127501000	N
S protein	801	HexNAc(1)Fuc(1)	NGlycan/349.1373	16084100	N
S protein	801	HexNAc(2)	NGlycan/406.1587	16370100	N
S protein	801	HexNAc(2)Hex(1)Fuc(1)	NGlycan/714.2695	92909400	N
S protein	801	HexNAc(2)Hex(2)	NGlycan/730.2644	70293700	N
S protein	801	HexNAc(2)Hex(2)	NGlycan/730.2644	70782100	N
S protein	801	HexNAc(2)Hex(2)	NGlycan/730.2644	185365000	N
S protein	801	HexNAc(2)Hex(2)	NGlycan/730.2644	265206000	N
S protein	801	HexNAc(2)Hex(2)	NGlycan/730.2644	1219330000	N
S protein	801	HexNAc(2)Hex(2)Fuc(1)	NGlycan/876.3223	8969880	N
S protein	801	HexNAc(2)Hex(2)Fuc(1)	NGlycan/876.3223	21601100	N
S protein	801	HexNAc(2)Hex(2)Fuc(1)	NGlycan/876.3223	22751400	N
S protein	801	HexNAc(2)Hex(2)Fuc(1)	NGlycan/876.3223	28983000	N
S protein	801	HexNAc(2)Hex(2)Fuc(1)	NGlycan/876.3223	150244000	N
S protein	801	HexNAc(2)Hex(2)Fuc(1)	NGlycan/876.3223	575057000	N
S protein	801	HexNAc(2)Hex(2)Fuc(1)	NGlycan/876.3223	581572000	N
S protein	801	HexNAc(2)Hex(3)	NGlycan/892.3172	5824450	N
S protein	801	HexNAc(2)Hex(3)	NGlycan/892.3172	8438810	N
S protein	801	HexNAc(2)Hex(3)	NGlycan/892.3172	40519300	N
S protein	801	HexNAc(2)Hex(3)	NGlycan/892.3172	259708000	N
S protein	801	HexNAc(2)Hex(3)	NGlycan/892.3172	315610000	N
S protein	801	HexNAc(2)Hex(3)	NGlycan/892.3172	478732000	N
S protein	801	HexNAc(2)Hex(3)	NGlycan/892.3172	743181000	N
S protein	801	HexNAc(2)Hex(3)	NGlycan/892.3172	1108280000	N
S protein	801	HexNAc(2)Hex(3)	NGlycan/892.3172	4193630000	N
S protein	801	HexNAc(2)Hex(3)	NGlycan/892.3172	15214300000	N
S protein	801	HexNAc(2)Hex(3)	NGlycan/892.3172	18751000000	N
S protein	801	HexNAc(2)Hex(3)Fuc(1)	NGlycan/1038.3751	55946200	N
S protein	801	HexNAc(2)Hex(3)Fuc(1)	NGlycan/1038.3751	235325000	N
S protein	801	HexNAc(2)Hex(3)Fuc(1)	NGlycan/1038.3751	328115000	N
S protein	801	HexNAc(2)Hex(3)Fuc(1)	NGlycan/1038.3751	330809000	N
S protein	801	HexNAc(2)Hex(3)Fuc(1)	NGlycan/1038.3751	392980000	N
S protein	801	HexNAc(2)Hex(3)Fuc(1)	NGlycan/1038.3751	1034330000	N
S protein	801	HexNAc(2)Hex(3)Fuc(1)	NGlycan/1038.3751	5634270000	N
S protein	801	HexNAc(2)Hex(3)Fuc(1)	NGlycan/1038.3751	11155900000	N
S protein	801	HexNAc(2)Hex(4)	NGlycan/1054.3700	6537350	N
S protein	801	HexNAc(2)Hex(4)	NGlycan/1054.3700	109165000	N
S protein	801	HexNAc(2)Hex(4)	NGlycan/1054.3700	222757000	N
S protein	801	HexNAc(2)Hex(4)Fuc(1)	NGlycan/1200.4279	39815100	N
S protein	801	HexNAc(2)Hex(4)Fuc(1)	NGlycan/1200.4279	63720100	N
S protein	801	HexNAc(2)Hex(5)	NGlycan/1216.4229	18576900	N
S protein	801	HexNAc(2)Hex(5)	NGlycan/1216.4229	20410200	N
S protein	801	HexNAc(2)Hex(5)	NGlycan/1216.4229	68369500	N
S protein	801	HexNAc(2)Hex(5)	NGlycan/1216.4229	583942000	N
S protein	801	HexNAc(2)Hex(5)	NGlycan/1216.4229	1022080000	N
S protein	801	HexNAc(2)Hex(6)	NGlycan/1378.4757	1648650	N
S protein	801	HexNAc(2)Hex(6)	NGlycan/1378.4757	3794630	N
S protein	801	HexNAc(2)Hex(6)	NGlycan/1378.4757	8132020	N
S protein	801	HexNAc(2)Hex(6)	NGlycan/1378.4757	9054560	N
S protein	801	HexNAc(2)Hex(6)	NGlycan/1378.4757	28843300	N
S protein	801	HexNAc(2)Hex(6)	NGlycan/1378.4757	413166000	N
S protein	801	HexNAc(2)Hex(6)	NGlycan/1378.4757	809515000	N
S protein	801	HexNAc(2)Hex(7)	NGlycan/1540.5285	4882400	N
S protein	801	HexNAc(2)Hex(7)	NGlycan/1540.5285	9105770	N
S protein	801	HexNAc(2)Hex(7)	NGlycan/1540.5285	9795920	N
S protein	801	HexNAc(2)Hex(7)	NGlycan/1540.5285	21852800	N
S protein	801	HexNAc(2)Hex(7)	NGlycan/1540.5285	25700600	N
S protein	801	HexNAc(2)Hex(7)	NGlycan/1540.5285	685585000	N
S protein	801	HexNAc(2)Hex(7)	NGlycan/1540.5285	977133000	N
S protein	801	HexNAc(2)Hex(7)	NGlycan/1540.5285	1043720000	N
S protein	801	HexNAc(2)Hex(8)	NGlycan/1702.5813	1056160	N
S protein	801	HexNAc(2)Hex(8)	NGlycan/1702.5813	4134870	N
S protein	801	HexNAc(2)Hex(8)	NGlycan/1702.5813	4597220	N
S protein	801	HexNAc(2)Hex(8)	NGlycan/1702.5813	13823200	N
S protein	801	HexNAc(2)Hex(8)	NGlycan/1702.5813	19946400	N
S protein	801	HexNAc(2)Hex(8)	NGlycan/1702.5813	390599000	N
S protein	801	HexNAc(2)Hex(8)	NGlycan/1702.5813	597728000	N
S protein	801	HexNAc(2)Hex(8)	NGlycan/1702.5813	775238000	N
S protein	801	HexNAc(2)Hex(9)	NGlycan/1864.6342	8010920	N
S protein	801	HexNAc(2)Hex(9)	NGlycan/1864.6342	11858900	N
S protein	801	HexNAc(2)Hex(9)	NGlycan/1864.6342	139900000	N
S protein	801	HexNAc(2)Hex(9)	NGlycan/1864.6342	180897000	N
S protein	801	HexNAc(2)Hex(9)	NGlycan/1864.6342	316505000	N
S protein	801	HexNAc(3)Hex(3)	NGlycan/1095.3966	18664800	N
S protein	801	HexNAc(3)Hex(3)	NGlycan/1095.3966	26076200	N
S protein	801	HexNAc(3)Hex(3)	NGlycan/1095.3966	41706700	N
S protein	801	HexNAc(3)Hex(3)	NGlycan/1095.3966	112820000	N
S protein	801	HexNAc(3)Hex(3)	NGlycan/1095.3966	157664000	N
S protein	801	HexNAc(3)Hex(3)	NGlycan/1095.3966	875880000	N
S protein	801	HexNAc(3)Hex(3)	NGlycan/1095.3966	1731210000	N
S protein	801	HexNAc(3)Hex(3)Fuc(1)	NGlycan/1241.4545	8923720	N
S protein	801	HexNAc(3)Hex(3)Fuc(1)	NGlycan/1241.4545	36854000	N
S protein	801	HexNAc(3)Hex(3)Fuc(1)	NGlycan/1241.4545	36880800	N
S protein	801	HexNAc(3)Hex(3)Fuc(1)	NGlycan/1241.4545	284773000	N
S protein	801	HexNAc(3)Hex(3)Fuc(1)	NGlycan/1241.4545	472432000	N
S protein	801	HexNAc(3)Hex(4)	NGlycan/1257.4494	5366500	N
S protein	801	HexNAc(3)Hex(4)	NGlycan/1257.4494	26919400	N
S protein	801	HexNAc(3)Hex(4)	NGlycan/1257.4494	202590000	N
S protein	801	HexNAc(3)Hex(4)	NGlycan/1257.4494	348781000	N
S protein	801	HexNAc(3)Hex(4)Fuc(1)	NGlycan/1403.5073	27691700	N
S protein	801	HexNAc(3)Hex(5)	NGlycan/1419.5022	6612480	N
S protein	801	HexNAc(3)Hex(5)	NGlycan/1419.5022	31357400	N
S protein	801	HexNAc(3)Hex(5)	NGlycan/1419.5022	35373800	N
S protein	801	HexNAc(3)Hex(5)	NGlycan/1419.5022	179168000	N
S protein	801	HexNAc(3)Hex(5)	NGlycan/1419.5022	347115000	N
S protein	801	HexNAc(3)Hex(5)Fuc(1)	NGlycan/1565.5601	1618230	N
S protein	801	HexNAc(3)Hex(5)Fuc(1)	NGlycan/1565.5601	10849300	N
S protein	801	HexNAc(3)Hex(5)Fuc(1)	NGlycan/1565.5601	16648700	N
S protein	1074	HexNAc(1)	NGlycan/203.0794	170316000	N
S protein	1074	HexNAc(1)Fuc(1)	NGlycan/349.1373	3002680	N
S protein	1074	HexNAc(1)Fuc(1)	NGlycan/349.1373	244675000	N
S protein	1074	HexNAc(2)	NGlycan/406.1587	4060890	N
S protein	1074	HexNAc(2)Fuc(1)	NGlycan/552.2167	644670	N
S protein	1074	HexNAc(2)Hex(2)	NGlycan/730.2644	34756700	N
S protein	1074	HexNAc(2)Hex(2)	NGlycan/730.2644	117734000	N
S protein	1074	HexNAc(2)Hex(2)	NGlycan/730.2644	629311000	N
S protein	1074	HexNAc(2)Hex(2)Fuc(1)	NGlycan/876.3223	4940130	N
S protein	1074	HexNAc(2)Hex(2)Fuc(1)	NGlycan/876.3223	16615500	N
S protein	1074	HexNAc(2)Hex(2)Fuc(1)	NGlycan/876.3223	33661200	N
S protein	1074	HexNAc(2)Hex(2)Fuc(1)	NGlycan/876.3223	560368000	N
S protein	1074	HexNAc(2)Hex(2)Fuc(1)	NGlycan/876.3223	816593000	N
S protein	1074	HexNAc(2)Hex(3)	NGlycan/892.3172	58322600	N
S protein	1074	HexNAc(2)Hex(3)	NGlycan/892.3172	2092430000	N
S protein	1074	HexNAc(2)Hex(3)	NGlycan/892.3172	9862390000	N
S protein	1074	HexNAc(2)Hex(3)Fuc(1)	NGlycan/1038.3751	44631900	N
S protein	1074	HexNAc(2)Hex(3)Fuc(1)	NGlycan/1038.3751	106615000	N
S protein	1074	HexNAc(2)Hex(3)Fuc(1)	NGlycan/1038.3751	235718000	N
S protein	1074	HexNAc(2)Hex(3)Fuc(1)	NGlycan/1038.3751	651918000	N
S protein	1074	HexNAc(2)Hex(3)Fuc(1)	NGlycan/1038.3751	3185460000	N
S protein	1074	HexNAc(2)Hex(3)Fuc(1)	NGlycan/1038.3751	5021860000	N
S protein	1074	HexNAc(2)Hex(3)Fuc(1)	NGlycan/1038.3751	10310600000	N
S protein	1074	HexNAc(2)Hex(4)	NGlycan/1054.3700	10931700	N
S protein	1074	HexNAc(2)Hex(4)	NGlycan/1054.3700	10970800	N
S protein	1074	HexNAc(2)Hex(4)	NGlycan/1054.3700	67614900	N
S protein	1074	HexNAc(2)Hex(4)	NGlycan/1054.3700	202180000	N
S protein	1074	HexNAc(2)Hex(4)Fuc(1)	NGlycan/1200.4279	48824900	N
S protein	1074	HexNAc(2)Hex(4)Fuc(1)	NGlycan/1200.4279	52963500	N
S protein	1074	HexNAc(2)Hex(4)Fuc(1)	NGlycan/1200.4279	123699000	N
S protein	1074	HexNAc(2)Hex(5)	NGlycan/1216.4229	14744000	N
S protein	1074	HexNAc(2)Hex(5)	NGlycan/1216.4229	31059500	N
S protein	1074	HexNAc(2)Hex(5)	NGlycan/1216.4229	52110400	N
S protein	1074	HexNAc(2)Hex(5)	NGlycan/1216.4229	100113000	N
S protein	1074	HexNAc(2)Hex(5)	NGlycan/1216.4229	497767000	N
S protein	1074	HexNAc(2)Hex(5)	NGlycan/1216.4229	530152000	N
S protein	1074	HexNAc(2)Hex(5)Fuc(1)	NGlycan/1362.4808	17571700	N
S protein	1074	HexNAc(2)Hex(5)Fuc(1)	NGlycan/1362.4808	22985400	N
S protein	1074	HexNAc(2)Hex(5)Fuc(1)	NGlycan/1362.4808	65265100	N
S protein	1074	HexNAc(2)Hex(6)	NGlycan/1378.4757	14539900	N
S protein	1074	HexNAc(2)Hex(6)	NGlycan/1378.4757	77369800	N
S protein	1074	HexNAc(2)Hex(6)	NGlycan/1378.4757	216484000	N
S protein	1074	HexNAc(2)Hex(6)	NGlycan/1378.4757	643256000	N
S protein	1074	HexNAc(2)Hex(6)	NGlycan/1378.4757	779323000	N
S protein	1074	HexNAc(2)Hex(7)	NGlycan/1540.5285	43159300	N
S protein	1074	HexNAc(2)Hex(7)	NGlycan/1540.5285	53457400	N
S protein	1074	HexNAc(2)Hex(7)	NGlycan/1540.5285	83901300	N
S protein	1074	HexNAc(2)Hex(7)	NGlycan/1540.5285	147429000	N
S protein	1074	HexNAc(2)Hex(7)	NGlycan/1540.5285	433078000	N
S protein	1074	HexNAc(2)Hex(7)	NGlycan/1540.5285	575065000	N
S protein	1074	HexNAc(2)Hex(8)	NGlycan/1702.5813	5808640	N
S protein	1074	HexNAc(2)Hex(8)	NGlycan/1702.5813	27877900	N
S protein	1074	HexNAc(2)Hex(8)	NGlycan/1702.5813	56166900	N
S protein	1074	HexNAc(2)Hex(8)	NGlycan/1702.5813	104434000	N
S protein	1074	HexNAc(2)Hex(8)	NGlycan/1702.5813	159222000	N
S protein	1074	HexNAc(2)Hex(8)	NGlycan/1702.5813	333556000	N
S protein	1074	HexNAc(2)Hex(8)	NGlycan/1702.5813	416132000	N
S protein	1074	HexNAc(2)Hex(9)	NGlycan/1864.6342	10320800	N
S protein	1074	HexNAc(2)Hex(9)	NGlycan/1864.6342	24429900	N
S protein	1074	HexNAc(2)Hex(9)	NGlycan/1864.6342	53642700	N
S protein	1074	HexNAc(2)Hex(9)	NGlycan/1864.6342	92921800	N
S protein	1074	HexNAc(2)Hex(9)	NGlycan/1864.6342	109032000	N
S protein	1074	HexNAc(2)Hex(9)	NGlycan/1864.6342	209779000	N
S protein	1074	HexNAc(3)Hex(3)	NGlycan/1095.3966	10455500	N
S protein	1074	HexNAc(3)Hex(3)	NGlycan/1095.3966	12123100	N
S protein	1074	HexNAc(3)Hex(3)	NGlycan/1095.3966	79311700	N
S protein	1074	HexNAc(3)Hex(3)	NGlycan/1095.3966	253444000	N
S protein	1074	HexNAc(3)Hex(3)	NGlycan/1095.3966	374202000	N
S protein	1074	HexNAc(3)Hex(3)	NGlycan/1095.3966	2463790000	N
S protein	1074	HexNAc(3)Hex(3)	NGlycan/1095.3966	3155980000	N
S protein	1074	HexNAc(3)Hex(3)Fuc(1)	NGlycan/1241.4545	9420990	N
S protein	1074	HexNAc(3)Hex(3)Fuc(1)	NGlycan/1241.4545	11761100	N
S protein	1074	HexNAc(3)Hex(3)Fuc(1)	NGlycan/1241.4545	61423600	N
S protein	1074	HexNAc(3)Hex(3)Fuc(1)	NGlycan/1241.4545	62918000	N
S protein	1074	HexNAc(3)Hex(3)Fuc(1)	NGlycan/1241.4545	430792000	N
S protein	1074	HexNAc(3)Hex(3)Fuc(1)	NGlycan/1241.4545	1001120000	N
S protein	1074	HexNAc(3)Hex(3)Fuc(1)	NGlycan/1241.4545	1602060000	N
S protein	1074	HexNAc(3)Hex(3)Fuc(1)	NGlycan/1241.4545	2538630000	N
S protein	1074	HexNAc(3)Hex(4)	NGlycan/1257.4494	11312500	N
S protein	1074	HexNAc(3)Hex(4)	NGlycan/1257.4494	29019800	N
S protein	1074	HexNAc(3)Hex(4)	NGlycan/1257.4494	61059700	N
S protein	1074	HexNAc(3)Hex(4)	NGlycan/1257.4494	107146000	N
S protein	1074	HexNAc(3)Hex(4)	NGlycan/1257.4494	315768000	N
S protein	1074	HexNAc(3)Hex(4)	NGlycan/1257.4494	386614000	N
S protein	1074	HexNAc(3)Hex(4)Fuc(1)	NGlycan/1403.5073	13446500	N
S protein	1074	HexNAc(3)Hex(4)Fuc(1)	NGlycan/1403.5073	27640500	N
S protein	1074	HexNAc(3)Hex(4)Fuc(1)	NGlycan/1403.5073	57080300	N
S protein	1074	HexNAc(3)Hex(4)Fuc(1)	NGlycan/1403.5073	124093000	N
S protein	1074	HexNAc(3)Hex(5)	NGlycan/1419.5022	30651000	N
S protein	1074	HexNAc(3)Hex(5)	NGlycan/1419.5022	37702700	N
S protein	1074	HexNAc(3)Hex(5)	NGlycan/1419.5022	40571200	N
S protein	1074	HexNAc(3)Hex(5)	NGlycan/1419.5022	234141000	N
S protein	1074	HexNAc(3)Hex(5)	NGlycan/1419.5022	257542000	N
S protein	1074	HexNAc(3)Hex(5)Fuc(1)	NGlycan/1565.5601	5327370	N
S protein	1074	HexNAc(3)Hex(5)Fuc(1)	NGlycan/1565.5601	14722400	N
S protein	1074	HexNAc(3)Hex(5)Fuc(1)	NGlycan/1565.5601	39636700	N
S protein	1074	HexNAc(3)Hex(5)Fuc(1)	NGlycan/1565.5601	39897800	N
S protein	1074	HexNAc(3)Hex(5)Fuc(1)	NGlycan/1565.5601	155450000	N
S protein	1074	HexNAc(4)Hex(3)	NGlycan/1298.4760	3058820	N
S protein	1074	HexNAc(4)Hex(3)	NGlycan/1298.4760	5762190	N
S protein	1074	HexNAc(4)Hex(3)	NGlycan/1298.4760	68699000	N
S protein	1074	HexNAc(4)Hex(3)Fuc(1)	NGlycan/1444.5339	16420700	N
S protein	1074	HexNAc(4)Hex(3)Fuc(1)	NGlycan/1444.5339	23079100	N
S protein	1098	HexNAc(1)	NGlycan/203.0794	162139000	N
S protein	1098	HexNAc(2)	NGlycan/406.1587	1935370	N
S protein	1098	HexNAc(2)	NGlycan/406.1587	13521400	N
S protein	1098	HexNAc(2)	NGlycan/406.1587	19703900	N
S protein	1098	HexNAc(2)Hex(1)	NGlycan/568.2116	33698300	N
S protein	1098	HexNAc(2)Hex(1)	NGlycan/568.2116	67814900	N
S protein	1098	HexNAc(2)Hex(2)	NGlycan/730.2644	43733800	N
S protein	1098	HexNAc(2)Hex(2)	NGlycan/730.2644	1531120000	N
S protein	1098	HexNAc(2)Hex(2)	NGlycan/730.2644	2521250000	N
S protein	1098	HexNAc(2)Hex(2)	NGlycan/730.2644	11435700000	N
S protein	1098	HexNAc(2)Hex(2)Fuc(1)	NGlycan/876.3223	23552900	N
S protein	1098	HexNAc(2)Hex(2)Fuc(1)	NGlycan/876.3223	321432000	N
S protein	1098	HexNAc(2)Hex(2)Fuc(1)	NGlycan/876.3223	836066000	N
S protein	1098	HexNAc(2)Hex(2)Fuc(1)	NGlycan/876.3223	1569940000	N
S protein	1098	HexNAc(2)Hex(3)	NGlycan/892.3172	204469	N
S protein	1098	HexNAc(2)Hex(3)	NGlycan/892.3172	2172680000	N
S protein	1098	HexNAc(2)Hex(3)	NGlycan/892.3172	4332290000	N
S protein	1098	HexNAc(2)Hex(3)	NGlycan/892.3172	13482800000	N
S protein	1098	HexNAc(2)Hex(3)	NGlycan/892.3172	26932000000	N
S protein	1098	HexNAc(2)Hex(3)Fuc(1)	NGlycan/1038.3751	6423520	N
S protein	1098	HexNAc(2)Hex(3)Fuc(1)	NGlycan/1038.3751	28368600	N
S protein	1098	HexNAc(2)Hex(3)Fuc(1)	NGlycan/1038.3751	55545600	N
S protein	1098	HexNAc(2)Hex(3)Fuc(1)	NGlycan/1038.3751	406271000	N
S protein	1098	HexNAc(2)Hex(3)Fuc(1)	NGlycan/1038.3751	1011560000	N
S protein	1098	HexNAc(2)Hex(3)Fuc(1)	NGlycan/1038.3751	2305090000	N
S protein	1098	HexNAc(2)Hex(3)Fuc(1)	NGlycan/1038.3751	5479810000	N
S protein	1098	HexNAc(2)Hex(4)	NGlycan/1054.3700	31192100	N
S protein	1098	HexNAc(2)Hex(4)	NGlycan/1054.3700	39713700	N
S protein	1098	HexNAc(2)Hex(4)	NGlycan/1054.3700	80209400	N
S protein	1098	HexNAc(2)Hex(4)	NGlycan/1054.3700	81605700	N
S protein	1098	HexNAc(2)Hex(4)	NGlycan/1054.3700	163079000	N
S protein	1098	HexNAc(2)Hex(4)Fuc(1)	NGlycan/1200.4279	1740950	N
S protein	1098	HexNAc(2)Hex(4)Fuc(1)	NGlycan/1200.4279	10491100	N
S protein	1098	HexNAc(2)Hex(4)Fuc(1)	NGlycan/1200.4279	52904300	N
S protein	1098	HexNAc(2)Hex(5)	NGlycan/1216.4229	50746200	N
S protein	1098	HexNAc(2)Hex(5)	NGlycan/1216.4229	75237900	N
S protein	1098	HexNAc(2)Hex(5)	NGlycan/1216.4229	145843000	N
S protein	1098	HexNAc(2)Hex(5)	NGlycan/1216.4229	288863000	N
S protein	1098	HexNAc(2)Hex(6)	NGlycan/1378.4757	28438800	N
S protein	1098	HexNAc(2)Hex(6)	NGlycan/1378.4757	31667900	N
S protein	1098	HexNAc(2)Hex(6)	NGlycan/1378.4757	43821300	N
S protein	1098	HexNAc(2)Hex(6)	NGlycan/1378.4757	182811000	N
S protein	1098	HexNAc(2)Hex(6)	NGlycan/1378.4757	326114000	N
S protein	1098	HexNAc(2)Hex(7)	NGlycan/1540.5285	15154200	N
S protein	1098	HexNAc(2)Hex(7)	NGlycan/1540.5285	24729900	N
S protein	1098	HexNAc(2)Hex(7)	NGlycan/1540.5285	39289200	N
S protein	1098	HexNAc(2)Hex(7)	NGlycan/1540.5285	47350800	N
S protein	1098	HexNAc(2)Hex(7)	NGlycan/1540.5285	182247000	N
S protein	1098	HexNAc(2)Hex(7)	NGlycan/1540.5285	263744000	N
S protein	1098	HexNAc(2)Hex(8)	NGlycan/1702.5813	5939270	N
S protein	1098	HexNAc(2)Hex(8)	NGlycan/1702.5813	24388100	N
S protein	1098	HexNAc(2)Hex(8)	NGlycan/1702.5813	25218400	N
S protein	1098	HexNAc(2)Hex(8)	NGlycan/1702.5813	35900500	N
S protein	1098	HexNAc(2)Hex(8)	NGlycan/1702.5813	160023000	N
S protein	1098	HexNAc(2)Hex(8)	NGlycan/1702.5813	166110000	N
S protein	1098	HexNAc(2)Hex(9)	NGlycan/1864.6342	373845	N
S protein	1098	HexNAc(2)Hex(9)	NGlycan/1864.6342	2580270	N
S protein	1098	HexNAc(2)Hex(9)	NGlycan/1864.6342	31858600	N
S protein	1098	HexNAc(2)Hex(9)	NGlycan/1864.6342	57536900	N
S protein	1098	HexNAc(2)Hex(9)	NGlycan/1864.6342	93099400	N
S protein	1098	HexNAc(2)Hex(9)	NGlycan/1864.6342	130680000	N
S protein	1098	HexNAc(3)Hex(3)	NGlycan/1095.3966	262588000	N
S protein	1098	HexNAc(3)Hex(3)	NGlycan/1095.3966	566024000	N
S protein	1098	HexNAc(3)Hex(3)	NGlycan/1095.3966	1111990000	N
S protein	1098	HexNAc(3)Hex(3)	NGlycan/1095.3966	3103800000	N
S protein	1098	HexNAc(3)Hex(3)	NGlycan/1095.3966	6628260000	N
S protein	1098	HexNAc(3)Hex(3)Fuc(1)	NGlycan/1241.4545	1275540	N
S protein	1098	HexNAc(3)Hex(3)Fuc(1)	NGlycan/1241.4545	60106600	N
S protein	1098	HexNAc(3)Hex(3)Fuc(1)	NGlycan/1241.4545	88082100	N
S protein	1098	HexNAc(3)Hex(3)Fuc(1)	NGlycan/1241.4545	98414100	N
S protein	1098	HexNAc(3)Hex(3)Fuc(1)	NGlycan/1241.4545	134006000	N
S protein	1098	HexNAc(3)Hex(3)Fuc(1)	NGlycan/1241.4545	400017000	N
S protein	1098	HexNAc(3)Hex(3)Fuc(1)	NGlycan/1241.4545	682947000	N
S protein	1098	HexNAc(3)Hex(4)	NGlycan/1257.4494	31684600	N
S protein	1098	HexNAc(3)Hex(4)	NGlycan/1257.4494	49377800	N
S protein	1098	HexNAc(3)Hex(4)	NGlycan/1257.4494	55086100	N
S protein	1098	HexNAc(3)Hex(4)	NGlycan/1257.4494	233991000	N
S protein	1098	HexNAc(3)Hex(4)	NGlycan/1257.4494	340983000	N
S protein	1098	HexNAc(3)Hex(4)Fuc(1)	NGlycan/1403.5073	1677900	N
S protein	1098	HexNAc(3)Hex(4)Fuc(1)	NGlycan/1403.5073	8249190	N
S protein	1098	HexNAc(3)Hex(4)Fuc(1)	NGlycan/1403.5073	25224700	N
S protein	1098	HexNAc(3)Hex(5)	NGlycan/1419.5022	12093800	N
S protein	1098	HexNAc(3)Hex(5)	NGlycan/1419.5022	13871500	N
S protein	1098	HexNAc(3)Hex(5)	NGlycan/1419.5022	25832100	N
S protein	1098	HexNAc(3)Hex(5)	NGlycan/1419.5022	73433400	N
S protein	1098	HexNAc(3)Hex(5)	NGlycan/1419.5022	108222000	N
S protein	1098	HexNAc(3)Hex(5)	NGlycan/1419.5022	130666000	N
S protein	1098	HexNAc(3)Hex(5)	NGlycan/1419.5022	191747000	N
S protein	1098	HexNAc(3)Hex(5)Fuc(1)	NGlycan/1565.5601	2379490	N
S protein	1098	HexNAc(3)Hex(5)Fuc(1)	NGlycan/1565.5601	10286100	N
S protein	1098	HexNAc(4)Hex(3)	NGlycan/1298.4760	20061200	N
S protein	1134	HexNAc(1)	NGlycan/203.0794	38237300	N
S protein	1134	HexNAc(1)Fuc(1)	NGlycan/349.1373	9500010	N
S protein	1134	HexNAc(2)Hex(1)Fuc(1)	NGlycan/714.2695	7470910	N
S protein	1134	HexNAc(2)Hex(1)Fuc(1)	NGlycan/714.2695	28572800	N
S protein	1134	HexNAc(2)Hex(2)	NGlycan/730.2644	10443600	N
S protein	1134	HexNAc(2)Hex(2)	NGlycan/730.2644	40782800	N
S protein	1134	HexNAc(2)Hex(2)Fuc(1)	NGlycan/876.3223	20746300	N
S protein	1134	HexNAc(2)Hex(2)Fuc(1)	NGlycan/876.3223	106482000	N
S protein	1134	HexNAc(2)Hex(3)	NGlycan/892.3172	26848600	N
S protein	1134	HexNAc(2)Hex(3)Fuc(1)	NGlycan/1038.3751	15452200	N
S protein	1134	HexNAc(2)Hex(4)	NGlycan/1054.3700	3698130	N
S protein	1134	HexNAc(2)Hex(5)Fuc(1)	NGlycan/1362.4808	3383040	N
S protein	1134	HexNAc(2)Hex(8)	NGlycan/1702.5813	4672170	N
S protein	1134	HexNAc(2)Hex(9)	NGlycan/1864.6342	9563860	N
S protein	1134	HexNAc(3)Hex(4)	NGlycan/1257.4494	1596650	N
S protein	1134	HexNAc(3)Hex(4)Fuc(1)	NGlycan/1403.5073	35988600	N
S protein	1134	HexNAc(3)Hex(5)	NGlycan/1419.5022	4668000	N
S protein	1134	HexNAc(3)Hex(5)Fuc(1)	NGlycan/1565.5601	1251840	N
S protein	1158	HexNAc(1),HexNAc(2)Hex(2)Fuc(1)	NGlycan/203.0794	19137200	N
S protein	1158	HexNAc(1),HexNAc(2)Hex(6)	NGlycan/1378.4757	6175760	N
S protein	1158	HexNAc(1),HexNAc(2)Hex(6)	NGlycan/1378.4757	16864300	N
S protein	1158	HexNAc(1),HexNAc(2)Hex(7)	NGlycan/1540.5285	6654620	N
S protein	1158	HexNAc(1),HexNAc(2)Hex(7)	NGlycan/1540.5285	16418200	N
S protein	1158	HexNAc(1),HexNAc(2)Hex(7)	NGlycan/1540.5285	27182300	N
S protein	1158	HexNAc(1),HexNAc(2)Hex(8)	NGlycan/1702.5813	4515780	N
S protein	1158	HexNAc(1),HexNAc(2)Hex(9)	NGlycan/1864.6342	7565730	N
S protein	1158	HexNAc(1),HexNAc(4)Hex(3)	NGlycan/1298.4760	6468160	N
S protein	1158	HexNAc(1)Fuc(1),HexNAc(2)Hex(2)Fuc(1)	NGlycan/349.1373	43932900	N
S protein	1158	HexNAc(1)Fuc(1),HexNAc(2)Hex(3)	NGlycan/892.3172	23097900	N
S protein	1158	HexNAc(1)Fuc(1),HexNAc(2)Hex(3)Fuc(1)	NGlycan/349.1373	53873500	N
S protein	1158	HexNAc(1)Fuc(1),HexNAc(2)Hex(6)	NGlycan/1378.4757	11924200	N
S protein	1158	HexNAc(1)Fuc(1),HexNAc(3)Hex(3)Fuc(1)	NGlycan/349.1373	38503300	N
S protein	1158	HexNAc(1)Fuc(1),HexNAc(3)Hex(3)Fuc(1)	NGlycan/349.1373	43469500	N
S protein	1158	HexNAc(1)Fuc(1),HexNAc(4)Hex(3)	NGlycan/349.1373	20773600	N
S protein	1158	HexNAc(2),HexNAc(2)Hex(1)	NGlycan/406.1587	3836570	N
S protein	1158	HexNAc(2),HexNAc(2)Hex(4)	NGlycan/406.1587	182496000	N
S protein	1158	HexNAc(2),HexNAc(2)Hex(4)	NGlycan/1054.3700	6714550	N
S protein	1158	HexNAc(2),HexNAc(2)Hex(5)	NGlycan/1216.4229	9124070	N
S protein	1158	HexNAc(2),HexNAc(3)Hex(3)	NGlycan/406.1587	8544810	N
S protein	1158	HexNAc(2),HexNAc(3)Hex(3)	NGlycan/1095.3966	78533400	N
S protein	1158	HexNAc(2),HexNAc(3)Hex(3)Fuc(1)	NGlycan/1241.4545	16587400	N
S protein	1158	HexNAc(2),HexNAc(3)Hex(4)	NGlycan/1257.4494	150748000	N
S protein	1158	HexNAc(2),HexNAc(3)Hex(5)	NGlycan/1419.5022	141723000	N
S protein	1158	HexNAc(2),HexNAc(4)Hex(3)	NGlycan/1298.4760	3642110	N
S protein	1158	HexNAc(2),HexNAc(4)Hex(3)	NGlycan/1298.4760	12278700	N
S protein	1158	HexNAc(2)Fuc(1),HexNAc(2)Hex(2)	NGlycan/552.2167	39631400	N
S protein	1158	HexNAc(2)Fuc(1),HexNAc(2)Hex(5)	NGlycan/1216.4229	5137120	N
S protein	1158	HexNAc(2)Fuc(1),HexNAc(2)Hex(5)	NGlycan/1216.4229	6337390	N
S protein	1158	HexNAc(2)Fuc(1),HexNAc(4)Hex(3)	NGlycan/552.2167	17034000	N
S protein	1158	HexNAc(2)Hex(1),HexNAc(2)Hex(3)	NGlycan/568.2116	58681000	N
S protein	1158	HexNAc(2)Hex(1),HexNAc(2)Hex(3)	NGlycan/568.2116	213626000	N
S protein	1158	HexNAc(2)Hex(1),HexNAc(2)Hex(4)	NGlycan/1054.3700	145102000	N
S protein	1158	HexNAc(2)Hex(1),HexNAc(2)Hex(4)	NGlycan/1054.3700	376856000	N
S protein	1158	HexNAc(2)Hex(1),HexNAc(2)Hex(4)Fuc(1)	NGlycan/1200.4279	85917000	N
S protein	1158	HexNAc(2)Hex(1),HexNAc(3)Hex(3)	NGlycan/568.2116	30888400	N
S protein	1158	HexNAc(2)Hex(1),HexNAc(3)Hex(3)	NGlycan/1095.3966	127058000	N
S protein	1158	HexNAc(2)Hex(1)Fuc(1),HexNAc(2)Hex(8)	NGlycan/1702.5813	3952590	N
S protein	1158	HexNAc(2)Hex(2)	NGlycan/730.2644	62261200	N
S protein	1158	HexNAc(2)Hex(2),HexNAc(2)Hex(3)	NGlycan/730.2644	9486430	N
S protein	1158	HexNAc(2)Hex(2),HexNAc(2)Hex(3)	NGlycan/730.2644	36020800	N
S protein	1158	HexNAc(2)Hex(2),HexNAc(2)Hex(3)	NGlycan/892.3172	24334400	N
S protein	1158	HexNAc(2)Hex(2),HexNAc(2)Hex(3)	NGlycan/892.3172	387484000	N
S protein	1158	HexNAc(2)Hex(2),HexNAc(2)Hex(3)	NGlycan/892.3172	2340590000	N
S protein	1158	HexNAc(2)Hex(2),HexNAc(2)Hex(4)	NGlycan/1054.3700	22975400	N
S protein	1158	HexNAc(2)Hex(2),HexNAc(3)Hex(3)	NGlycan/1095.3966	6299530	N
S protein	1158	HexNAc(2)Hex(2),HexNAc(3)Hex(3)	NGlycan/1095.3966	34728100	N
S protein	1158	HexNAc(2)Hex(2),HexNAc(3)Hex(3)	NGlycan/1095.3966	296589000	N
S protein	1158	HexNAc(2)Hex(2),HexNAc(4)Hex(3)	NGlycan/730.2644	12687700	N
S protein	1158	HexNAc(2)Hex(2),HexNAc(4)Hex(3)	NGlycan/1298.4760	15946700	N
S protein	1158	HexNAc(2)Hex(2),HexNAc(4)Hex(3)	NGlycan/1298.4760	29576300	N
S protein	1158	HexNAc(2)Hex(2)Fuc(1)	NGlycan/876.3223	89398300	N
S protein	1158	HexNAc(2)Hex(2)Fuc(1),HexNAc(2)Hex(2)Fuc(1)	NGlycan/876.3223	31340500	N
S protein	1158	HexNAc(2)Hex(2)Fuc(1),HexNAc(2)Hex(3)	NGlycan/876.3223	26489600	N
S protein	1158	HexNAc(2)Hex(2)Fuc(1),HexNAc(2)Hex(4)	NGlycan/1054.3700	10471500	N
S protein	1158	HexNAc(2)Hex(2)Fuc(1),HexNAc(3)Hex(4)	NGlycan/1257.4494	11788800	N
S protein	1158	HexNAc(2)Hex(2)Fuc(1),HexNAc(4)Hex(3)	NGlycan/876.3223	13378800	N
S protein	1158	HexNAc(2)Hex(2)Fuc(1),HexNAc(4)Hex(3)Fuc(1)	NGlycan/1444.5339	18074100	N
S protein	1158	HexNAc(2)Hex(3),HexNAc(4)Hex(3)	NGlycan/1298.4760	20458900	N
S protein	1158	HexNAc(2)Hex(3),HexNAc(4)Hex(3)	NGlycan/1298.4760	902570000	N
S protein	1158	HexNAc(2)Hex(3),HexNAc(4)Hex(3)Fuc(1)	NGlycan/1444.5339	13899900	N
S protein	1158	HexNAc(2)Hex(3),HexNAc(4)Hex(3)Fuc(1)	NGlycan/1444.5339	22707600	N
S protein	1158	HexNAc(2)Hex(3)Fuc(1)	NGlycan/1038.3751	235367000	N
S protein	1158	HexNAc(2)Hex(3)Fuc(1),HexNAc(4)Hex(3)Fuc(1)	NGlycan/1444.5339	8968110	N
S protein	1158	HexNAc(2)Hex(3)Fuc(1),HexNAc(4)Hex(3)Fuc(1)	NGlycan/1444.5339	3093020000	N
S protein	1158	HexNAc(2)Hex(4),HexNAc(4)Hex(3)	NGlycan/1298.4760	69914600	N
S protein	1158	HexNAc(2)Hex(4),HexNAc(4)Hex(3)	NGlycan/1298.4760	81968800	N
S protein	1158	HexNAc(2)Hex(4),HexNAc(4)Hex(3)Fuc(1)	NGlycan/1444.5339	146895000	N
S protein	1158	HexNAc(2)Hex(5)	NGlycan/1216.4229	43419600	N
S protein	1158	HexNAc(2)Hex(5)Fuc(1)	NGlycan/1362.4808	260814	N
S protein	1158	HexNAc(2)Hex(5)Fuc(1)	NGlycan/1362.4808	1401210	N
S protein	1158	HexNAc(2)Hex(6),HexNAc(4)Hex(3)	NGlycan/1378.4757	12349400	N
S protein	1158	HexNAc(2)Hex(6),HexNAc(4)Hex(3)	NGlycan/1378.4757	97759100	N
S protein	1158	HexNAc(2)Hex(7)	NGlycan/1540.5285	11764300	N
S protein	1158	HexNAc(3)Hex(3)	NGlycan/1095.3966	272681000	N
S protein	1158	HexNAc(3)Hex(3),HexNAc(3)Hex(4)	NGlycan/1257.4494	69914600	N
S protein	1158	HexNAc(3)Hex(3),HexNAc(3)Hex(4)	NGlycan/1257.4494	2633430000	N
S protein	1158	HexNAc(3)Hex(3),HexNAc(3)Hex(4)Fuc(1)	NGlycan/1403.5073	95162700	N
S protein	1158	HexNAc(3)Hex(3),HexNAc(3)Hex(5)	NGlycan/1419.5022	12532500	N
S protein	1158	HexNAc(3)Hex(3),HexNAc(3)Hex(5)	NGlycan/1419.5022	126322000	N
S protein	1158	HexNAc(3)Hex(3),HexNAc(3)Hex(5)	NGlycan/1419.5022	7981320000	N
S protein	1158	HexNAc(3)Hex(3),HexNAc(3)Hex(5)Fuc(1)	NGlycan/1095.3966	290902000	N
S protein	1158	HexNAc(3)Hex(3),HexNAc(3)Hex(5)Fuc(1)	NGlycan/1565.5601	82098800	N
S protein	1158	HexNAc(3)Hex(3),HexNAc(3)Hex(5)Fuc(1)	NGlycan/1565.5601	138828000	N
S protein	1158	HexNAc(3)Hex(3),HexNAc(4)Hex(3)Fuc(1)	NGlycan/1444.5339	24592800	N
S protein	1158	HexNAc(3)Hex(3)Fuc(1)	NGlycan/1241.4545	11784700	N
S protein	1158	HexNAc(3)Hex(3)Fuc(1),HexNAc(3)Hex(5)Fuc(1)	NGlycan/1565.5601	7701990	N
S protein	1158	HexNAc(3)Hex(3)Fuc(1),HexNAc(3)Hex(5)Fuc(1)	NGlycan/1565.5601	17022500	N
S protein	1158	HexNAc(3)Hex(3)Fuc(1),HexNAc(4)Hex(3)Fuc(1)	NGlycan/1444.5339	2794240	N
S protein	1158	HexNAc(3)Hex(3)Fuc(1),HexNAc(4)Hex(3)Fuc(1)	NGlycan/1444.5339	17475500	N
S protein	1158	HexNAc(3)Hex(3)Fuc(1),HexNAc(4)Hex(3)Fuc(1)	NGlycan/1444.5339	25768800	N
S protein	1158	HexNAc(3)Hex(4),HexNAc(3)Hex(5)Fuc(1)	NGlycan/1565.5601	67388500	N
S protein	1158	HexNAc(3)Hex(4),HexNAc(3)Hex(5)Fuc(1)	NGlycan/1565.5601	122583000	N
S protein	1158	HexNAc(3)Hex(4),HexNAc(4)Hex(3)	NGlycan/1257.4494	297216000	N
S protein	1158	HexNAc(3)Hex(4),HexNAc(4)Hex(3)Fuc(1)	NGlycan/1444.5339	216836000	N
S protein	1158	HexNAc(3)Hex(5),HexNAc(4)Hex(3)	NGlycan/1419.5022	3564400	N
S protein	1158	HexNAc(3)Hex(5),HexNAc(4)Hex(3)	NGlycan/1419.5022	1068070000	N
S protein	1158	HexNAc(3)Hex(5)Fuc(1)	NGlycan/1565.5601	16242200	N
S protein	1158	HexNAc(3)Hex(5)Fuc(1),HexNAc(4)Hex(3)	NGlycan/1565.5601	6381800	N
S protein	1158	HexNAc(3)Hex(5)Fuc(1),HexNAc(4)Hex(3)	NGlycan/1565.5601	51630500	N
S protein	1158	HexNAc(4)Hex(3)Fuc(1)	NGlycan/1444.5339	1125930	N
S protein	1173	HexNAc(1)	NGlycan/203.0794	8202930	N
S protein	1173	HexNAc(1),HexNAc(2)Hex(2)Fuc(1)	NGlycan/876.3223	19137200	N
S protein	1173	HexNAc(1),HexNAc(2)Hex(6)	NGlycan/203.0794	6175760	N
S protein	1173	HexNAc(1),HexNAc(2)Hex(6)	NGlycan/203.0794	16864300	N
S protein	1173	HexNAc(1),HexNAc(2)Hex(7)	NGlycan/203.0794	6654620	N
S protein	1173	HexNAc(1),HexNAc(2)Hex(7)	NGlycan/203.0794	16418200	N
S protein	1173	HexNAc(1),HexNAc(2)Hex(7)	NGlycan/203.0794	27182300	N
S protein	1173	HexNAc(1),HexNAc(2)Hex(8)	NGlycan/203.0794	4515780	N
S protein	1173	HexNAc(1),HexNAc(2)Hex(9)	NGlycan/203.0794	7565730	N
S protein	1173	HexNAc(1),HexNAc(4)Hex(3)	NGlycan/203.0794	6468160	N
S protein	1173	HexNAc(1)Fuc(1),HexNAc(2)Hex(2)Fuc(1)	NGlycan/876.3223	43932900	N
S protein	1173	HexNAc(1)Fuc(1),HexNAc(2)Hex(3)	NGlycan/349.1373	23097900	N
S protein	1173	HexNAc(1)Fuc(1),HexNAc(2)Hex(3)Fuc(1)	NGlycan/1038.3751	53873500	N
S protein	1173	HexNAc(1)Fuc(1),HexNAc(2)Hex(6)	NGlycan/349.1373	11924200	N
S protein	1173	HexNAc(1)Fuc(1),HexNAc(3)Hex(3)Fuc(1)	NGlycan/1241.4545	38503300	N
S protein	1173	HexNAc(1)Fuc(1),HexNAc(3)Hex(3)Fuc(1)	NGlycan/1241.4545	43469500	N
S protein	1173	HexNAc(1)Fuc(1),HexNAc(4)Hex(3)	NGlycan/1298.4760	20773600	N
S protein	1173	HexNAc(2),HexNAc(2)Hex(1)	NGlycan/568.2116	3836570	N
S protein	1173	HexNAc(2),HexNAc(2)Hex(4)	NGlycan/406.1587	6714550	N
S protein	1173	HexNAc(2),HexNAc(2)Hex(4)	NGlycan/1054.3700	182496000	N
S protein	1173	HexNAc(2),HexNAc(2)Hex(5)	NGlycan/406.1587	9124070	N
S protein	1173	HexNAc(2),HexNAc(3)Hex(3)	NGlycan/406.1587	78533400	N
S protein	1173	HexNAc(2),HexNAc(3)Hex(3)	NGlycan/1095.3966	8544810	N
S protein	1173	HexNAc(2),HexNAc(3)Hex(3)Fuc(1)	NGlycan/406.1587	16587400	N
S protein	1173	HexNAc(2),HexNAc(3)Hex(4)	NGlycan/406.1587	150748000	N
S protein	1173	HexNAc(2),HexNAc(3)Hex(5)	NGlycan/406.1587	141723000	N
S protein	1173	HexNAc(2),HexNAc(4)Hex(3)	NGlycan/406.1587	3642110	N
S protein	1173	HexNAc(2),HexNAc(4)Hex(3)	NGlycan/406.1587	12278700	N
S protein	1173	HexNAc(2)Fuc(1),HexNAc(2)Hex(2)	NGlycan/730.2644	39631400	N
S protein	1173	HexNAc(2)Fuc(1),HexNAc(2)Hex(5)	NGlycan/552.2167	5137120	N
S protein	1173	HexNAc(2)Fuc(1),HexNAc(2)Hex(5)	NGlycan/552.2167	6337390	N
S protein	1173	HexNAc(2)Fuc(1),HexNAc(4)Hex(3)	NGlycan/1298.4760	17034000	N
S protein	1173	HexNAc(2)Hex(1),HexNAc(2)Hex(3)	NGlycan/892.3172	58681000	N
S protein	1173	HexNAc(2)Hex(1),HexNAc(2)Hex(3)	NGlycan/892.3172	213626000	N
S protein	1173	HexNAc(2)Hex(1),HexNAc(2)Hex(4)	NGlycan/568.2116	145102000	N
S protein	1173	HexNAc(2)Hex(1),HexNAc(2)Hex(4)	NGlycan/568.2116	376856000	N
S protein	1173	HexNAc(2)Hex(1),HexNAc(2)Hex(4)Fuc(1)	NGlycan/568.2116	85917000	N
S protein	1173	HexNAc(2)Hex(1),HexNAc(3)Hex(3)	NGlycan/568.2116	127058000	N
S protein	1173	HexNAc(2)Hex(1),HexNAc(3)Hex(3)	NGlycan/1095.3966	30888400	N
S protein	1173	HexNAc(2)Hex(1)Fuc(1)	NGlycan/714.2695	19612600	N
S protein	1173	HexNAc(2)Hex(1)Fuc(1),HexNAc(2)Hex(8)	NGlycan/714.2695	3952590	N
S protein	1173	HexNAc(2)Hex(2)	NGlycan/730.2644	2096060	N
S protein	1173	HexNAc(2)Hex(2)	NGlycan/730.2644	11622900	N
S protein	1173	HexNAc(2)Hex(2),HexNAc(2)Hex(3)	NGlycan/730.2644	24334400	N
S protein	1173	HexNAc(2)Hex(2),HexNAc(2)Hex(3)	NGlycan/730.2644	387484000	N
S protein	1173	HexNAc(2)Hex(2),HexNAc(2)Hex(3)	NGlycan/730.2644	2340590000	N
S protein	1173	HexNAc(2)Hex(2),HexNAc(2)Hex(3)	NGlycan/892.3172	9486430	N
S protein	1173	HexNAc(2)Hex(2),HexNAc(2)Hex(3)	NGlycan/892.3172	36020800	N
S protein	1173	HexNAc(2)Hex(2),HexNAc(2)Hex(4)	NGlycan/730.2644	22975400	N
S protein	1173	HexNAc(2)Hex(2),HexNAc(3)Hex(3)	NGlycan/730.2644	6299530	N
S protein	1173	HexNAc(2)Hex(2),HexNAc(3)Hex(3)	NGlycan/730.2644	34728100	N
S protein	1173	HexNAc(2)Hex(2),HexNAc(3)Hex(3)	NGlycan/730.2644	296589000	N
S protein	1173	HexNAc(2)Hex(2),HexNAc(4)Hex(3)	NGlycan/730.2644	15946700	N
S protein	1173	HexNAc(2)Hex(2),HexNAc(4)Hex(3)	NGlycan/730.2644	29576300	N
S protein	1173	HexNAc(2)Hex(2),HexNAc(4)Hex(3)	NGlycan/1298.4760	12687700	N
S protein	1173	HexNAc(2)Hex(2)Fuc(1)	NGlycan/876.3223	89398300	N
S protein	1173	HexNAc(2)Hex(2)Fuc(1),HexNAc(2)Hex(2)Fuc(1)	NGlycan/876.3223	31340500	N
S protein	1173	HexNAc(2)Hex(2)Fuc(1),HexNAc(2)Hex(3)	NGlycan/892.3172	26489600	N
S protein	1173	HexNAc(2)Hex(2)Fuc(1),HexNAc(2)Hex(4)	NGlycan/876.3223	10471500	N
S protein	1173	HexNAc(2)Hex(2)Fuc(1),HexNAc(3)Hex(4)	NGlycan/876.3223	11788800	N
S protein	1173	HexNAc(2)Hex(2)Fuc(1),HexNAc(4)Hex(3)	NGlycan/1298.4760	13378800	N
S protein	1173	HexNAc(2)Hex(2)Fuc(1),HexNAc(4)Hex(3)Fuc(1)	NGlycan/876.3223	18074100	N
S protein	1173	HexNAc(2)Hex(3)	NGlycan/892.3172	4798360	N
S protein	1173	HexNAc(2)Hex(3)	NGlycan/892.3172	31990600	N
S protein	1173	HexNAc(2)Hex(3),HexNAc(4)Hex(3)	NGlycan/892.3172	20458900	N
S protein	1173	HexNAc(2)Hex(3),HexNAc(4)Hex(3)	NGlycan/892.3172	902570000	N
S protein	1173	HexNAc(2)Hex(3),HexNAc(4)Hex(3)Fuc(1)	NGlycan/892.3172	13899900	N
S protein	1173	HexNAc(2)Hex(3),HexNAc(4)Hex(3)Fuc(1)	NGlycan/892.3172	22707600	N
S protein	1173	HexNAc(2)Hex(3)Fuc(1)	NGlycan/1038.3751	11689600	N
S protein	1173	HexNAc(2)Hex(3)Fuc(1)	NGlycan/1038.3751	34524600	N
S protein	1173	HexNAc(2)Hex(3)Fuc(1)	NGlycan/1038.3751	235367000	N
S protein	1173	HexNAc(2)Hex(3)Fuc(1),HexNAc(4)Hex(3)Fuc(1)	NGlycan/1038.3751	8968110	N
S protein	1173	HexNAc(2)Hex(3)Fuc(1),HexNAc(4)Hex(3)Fuc(1)	NGlycan/1038.3751	3093020000	N
S protein	1173	HexNAc(2)Hex(4),HexNAc(4)Hex(3)	NGlycan/1054.3700	69914600	N
S protein	1173	HexNAc(2)Hex(4),HexNAc(4)Hex(3)	NGlycan/1054.3700	81968800	N
S protein	1173	HexNAc(2)Hex(4),HexNAc(4)Hex(3)Fuc(1)	NGlycan/1054.3700	146895000	N
S protein	1173	HexNAc(2)Hex(6)	NGlycan/1378.4757	22516700	N
S protein	1173	HexNAc(2)Hex(6),HexNAc(4)Hex(3)	NGlycan/1298.4760	12349400	N
S protein	1173	HexNAc(2)Hex(6),HexNAc(4)Hex(3)	NGlycan/1298.4760	97759100	N
S protein	1173	HexNAc(2)Hex(7)	NGlycan/1540.5285	15706900	N
S protein	1173	HexNAc(2)Hex(7)	NGlycan/1540.5285	72181200	N
S protein	1173	HexNAc(2)Hex(8)	NGlycan/1702.5813	25149900	N
S protein	1173	HexNAc(3)Hex(3),HexNAc(3)Hex(4)	NGlycan/1095.3966	69914600	N
S protein	1173	HexNAc(3)Hex(3),HexNAc(3)Hex(4)	NGlycan/1095.3966	2633430000	N
S protein	1173	HexNAc(3)Hex(3),HexNAc(3)Hex(4)Fuc(1)	NGlycan/1095.3966	95162700	N
S protein	1173	HexNAc(3)Hex(3),HexNAc(3)Hex(5)	NGlycan/1095.3966	12532500	N
S protein	1173	HexNAc(3)Hex(3),HexNAc(3)Hex(5)	NGlycan/1095.3966	126322000	N
S protein	1173	HexNAc(3)Hex(3),HexNAc(3)Hex(5)	NGlycan/1095.3966	7981320000	N
S protein	1173	HexNAc(3)Hex(3),HexNAc(3)Hex(5)Fuc(1)	NGlycan/1095.3966	82098800	N
S protein	1173	HexNAc(3)Hex(3),HexNAc(3)Hex(5)Fuc(1)	NGlycan/1095.3966	138828000	N
S protein	1173	HexNAc(3)Hex(3),HexNAc(3)Hex(5)Fuc(1)	NGlycan/1565.5601	290902000	N
S protein	1173	HexNAc(3)Hex(3),HexNAc(4)Hex(3)Fuc(1)	NGlycan/1095.3966	24592800	N
S protein	1173	HexNAc(3)Hex(3)Fuc(1)	NGlycan/1241.4545	535696000	N
S protein	1173	HexNAc(3)Hex(3)Fuc(1),HexNAc(3)Hex(5)Fuc(1)	NGlycan/1241.4545	7701990	N
S protein	1173	HexNAc(3)Hex(3)Fuc(1),HexNAc(3)Hex(5)Fuc(1)	NGlycan/1241.4545	17022500	N
S protein	1173	HexNAc(3)Hex(3)Fuc(1),HexNAc(4)Hex(3)Fuc(1)	NGlycan/1241.4545	2794240	N
S protein	1173	HexNAc(3)Hex(3)Fuc(1),HexNAc(4)Hex(3)Fuc(1)	NGlycan/1241.4545	17475500	N
S protein	1173	HexNAc(3)Hex(3)Fuc(1),HexNAc(4)Hex(3)Fuc(1)	NGlycan/1241.4545	25768800	N
S protein	1173	HexNAc(3)Hex(4),HexNAc(3)Hex(5)Fuc(1)	NGlycan/1257.4494	67388500	N
S protein	1173	HexNAc(3)Hex(4),HexNAc(3)Hex(5)Fuc(1)	NGlycan/1257.4494	122583000	N
S protein	1173	HexNAc(3)Hex(4),HexNAc(4)Hex(3)	NGlycan/1298.4760	297216000	N
S protein	1173	HexNAc(3)Hex(4),HexNAc(4)Hex(3)Fuc(1)	NGlycan/1257.4494	216836000	N
S protein	1173	HexNAc(3)Hex(5)	NGlycan/1419.5022	19534600	N
S protein	1173	HexNAc(3)Hex(5),HexNAc(4)Hex(3)	NGlycan/1298.4760	3564400	N
S protein	1173	HexNAc(3)Hex(5),HexNAc(4)Hex(3)	NGlycan/1298.4760	1068070000	N
S protein	1173	HexNAc(3)Hex(5)Fuc(1)	NGlycan/1565.5601	1344780	N
S protein	1173	HexNAc(3)Hex(5)Fuc(1)	NGlycan/1565.5601	3331570	N
S protein	1173	HexNAc(3)Hex(5)Fuc(1)	NGlycan/1565.5601	8729640	N
S protein	1173	HexNAc(3)Hex(5)Fuc(1),HexNAc(4)Hex(3)	NGlycan/1298.4760	6381800	N
S protein	1173	HexNAc(3)Hex(5)Fuc(1),HexNAc(4)Hex(3)	NGlycan/1298.4760	51630500	N
S protein	1173	HexNAc(4)Hex(3)	NGlycan/1298.4760	41252000	N
S protein	1173	HexNAc(4)Hex(3)	NGlycan/1298.4760	1120060000	N
S protein	1173	HexNAc(4)Hex(3)Fuc(1)	NGlycan/1444.5339	9462050	N
S protein	1173	HexNAc(4)Hex(3)Fuc(1)	NGlycan/1444.5339	111192000	N
S protein	1194	HexNAc(2)Hex(2)Fuc(1)	NGlycan/876.3223	68769400	N
S protein	1194	HexNAc(2)Hex(3)Fuc(1)	NGlycan/1038.3751	45364300	N
S protein	1194	HexNAc(2)Hex(3)Fuc(1)	NGlycan/1038.3751	73949300	N
S protein	1194	HexNAc(2)Hex(4)Fuc(1)	NGlycan/1200.4279	5593030	N
S protein	1194	HexNAc(3)Hex(3)Fuc(1)	NGlycan/1241.4545	1541020	N
S protein	1194	HexNAc(3)Hex(4)Fuc(1)	NGlycan/1403.5073	1996340	N
S protein	1194	HexNAc(4)Hex(3)	NGlycan/1298.4760	8584840	N
S protein	1194	HexNAc(4)Hex(3)	NGlycan/1298.4760	15161000	N
