# Supplementary material for: Identification of 22 N-glycosites on Spike Glycoprotein of SARS-CoV-2 and Accessible Surface Glycopeptide Motifs: Implications on Vaccination and Antibody Therapeutics
Source: Preprints.org preprint supplement (doi:10.20944/preprints202002.0381.v2), 2020-04-13
Supplement: Supplementary file 3 [file Supplemental Table 3.docx]

**Supplemental Table 1: List of monoclonal antibodies for Spike protein of SARS-CoV**

| Antibody binding site | Nearby N-glycosylation | Clone | Ref |
| --- | --- | --- | --- |
| N-terminal domain (NBD) |  |  |  |
| 130 FELCDNPFFAVSKPMGTQTHT 150 | 158NCT | 68 | 3 |
| 236 TAFSPAQDIWGTSAAAYF 253 | 227NIT | 114E3,115H2,116F8,112F9,120D9 | 14 |
| Receptor binding domain (RBD) |  |  |  |
| W423,N424 |  | S-9-11,N-176-15 | 7 |
| 435 NYNYKYRYLRHGKLRPF 451 |  | 4D5 | 8 |
| 442 YLRHGKLRPFERDISNVPFSPDGK 465 |  | 17H9 |
| 460 FSPDGKPCTPPALNCYW 476 |  | F26G18 | 9 |
| Unknown sites in SARS RBD |  | F26G9,F26G10,F26G19 |
| F360,Y442, L472, D480, T487 | 357NST | CR3006 | 10 |
| Unknown sites in SARS RBD |  | CR3013 CR3014 |
| L472,N479,D480 |  | 80R | 11 |
| N479 |  | CS5、CS84、FM6 |
| R395, R426, F483, Y484,I489, Y491, Q492 |  | m396 |
| T332,N479, D463 | 330NAT | FM39 | 12 |
| P462,N479 |  | CR3014 | 13 |
| Unknown sites outside of SARS RBD |  | CR3022 |
| T359,G391,D392,N424,R426,N427,T486,488 GIGYQ 492 | 357NST | F26G19 | 16 |
| T359,T363,K365,390 KGD 392,V394,R395,R426,S432,  Y436,G482,484 YTTTGIGYQ 492 | 357NST | m396 | 17 |
| R426,S432,T433,Y436,N437,K439,Y440,Y442,470 PALNCYWPLND 480,484 YTTTGI 489, Y491,Q492 |  | 80R | 18 |
| 490 GYQPYRVVVLSFELLNAPATV 510 |  | 201 | 3 |
| S1 (non-RBD) and S2 subunits |  |  |  |
| 536 GVLTPSSKRFQPFQQFG 552 |  | 114G5 | 14 |
| 612 ADQLTPAWR 620 | 602NCT | F26G8 | 9 |
| 549 QQFGRDVSDF 558 |  | 101F10,103F2,104D4,111A7, 121B8 | 14 |
| 731 CANLLLQYGSFCTQL 745 |  | 65B3,63B10 | 6 |
| 791 PLKPTKRSFIEDLLF 805 | 783NFS | 5H10* | 6 |
| 814 GFMKQYGECL 823 |  | 102D7 | 14 |
| 1125 PELDSFKEELDKYFKNH 1141 | 1116NNT | 119F6 | 14 |

*Generated by immunizing mice with recombinant Spike protein produced in *Escherichia coli.*
