# Supplementary figures and images for: Identification of 22 N-glycosites on Spike Glycoprotein of SARS-CoV-2 and Accessible Surface Glycopeptide Motifs: Implications on Vaccination and Antibody Therapeutics
Source: Preprints.org preprint supplement (doi:10.20944/preprints202002.0381.v2), 2020-04-13

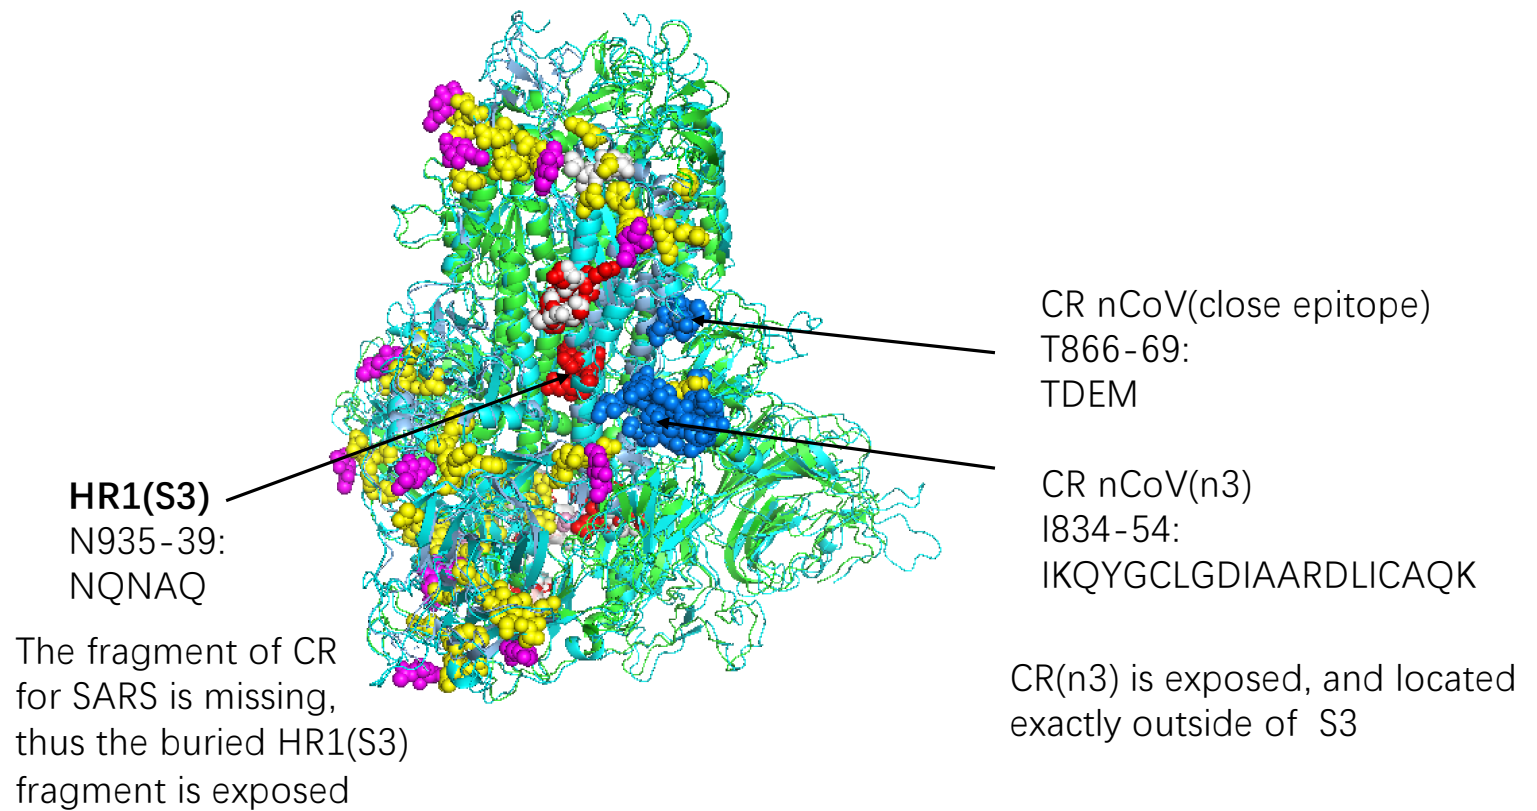

Supplement: Supplementary file 3 [file supplementary]

SARS RBD

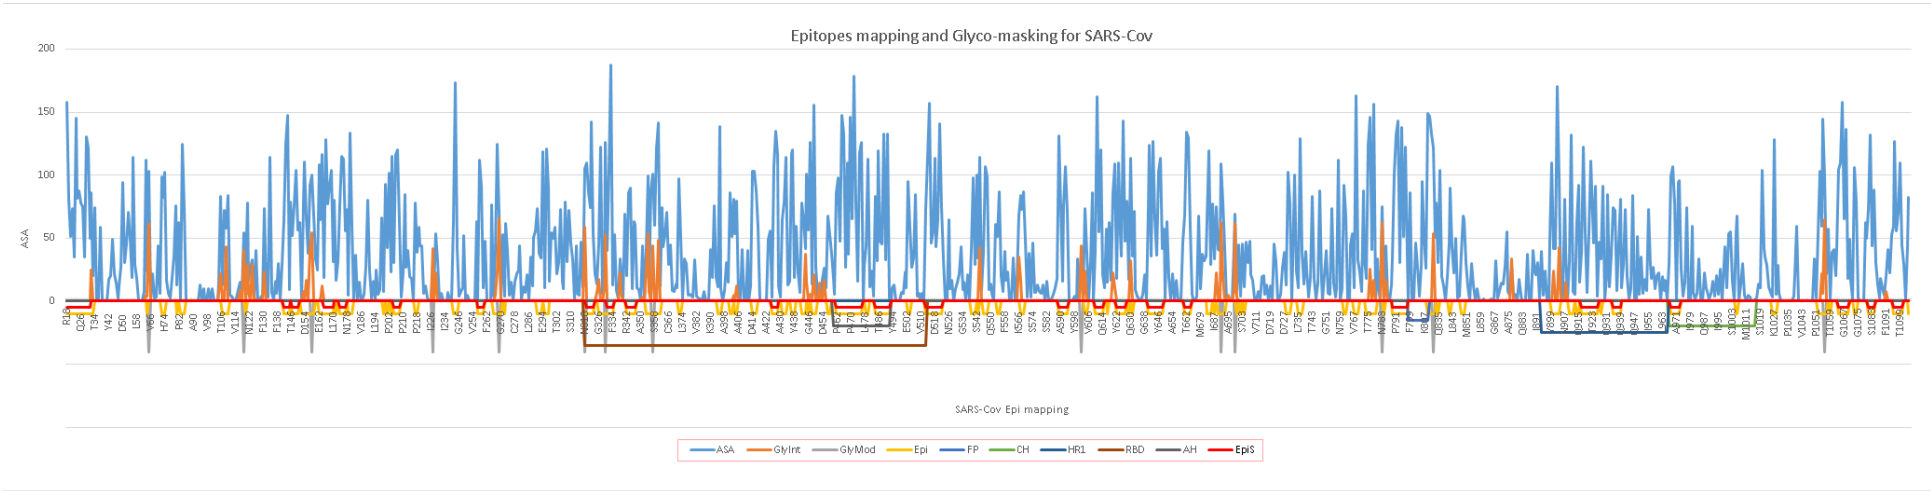

2019-nCoV

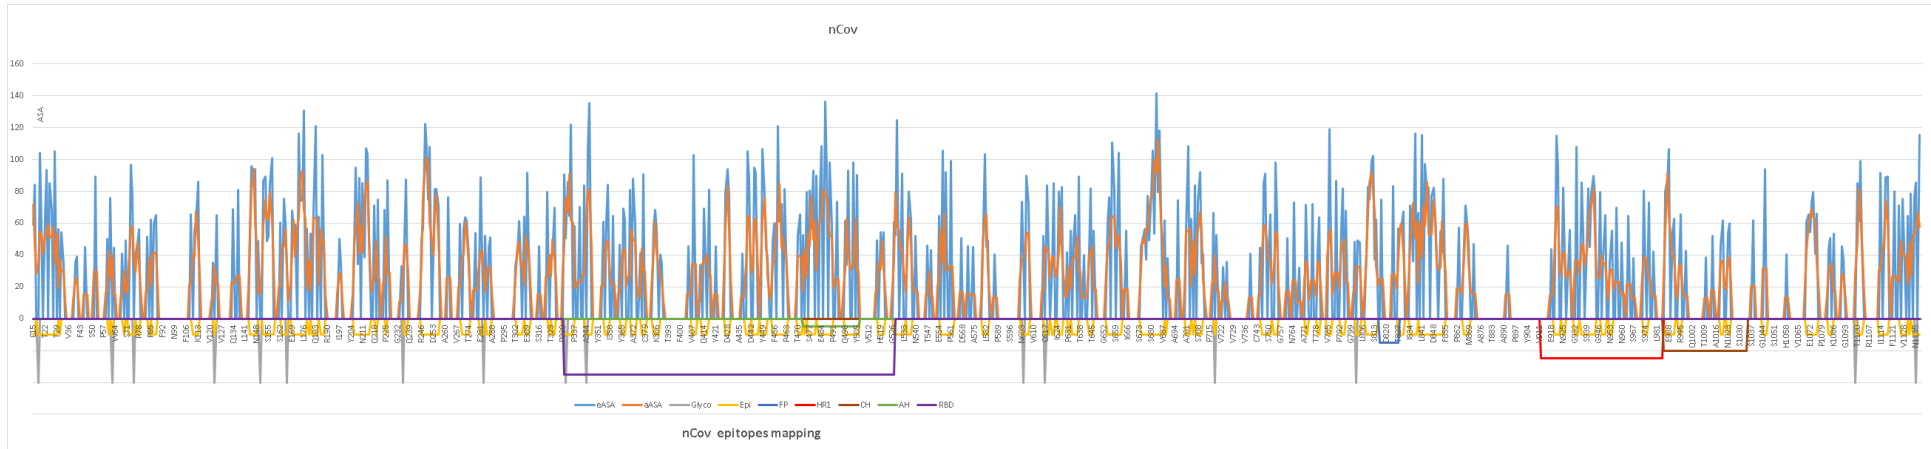

Supplement: Supplementary file 4 [file supplementary]

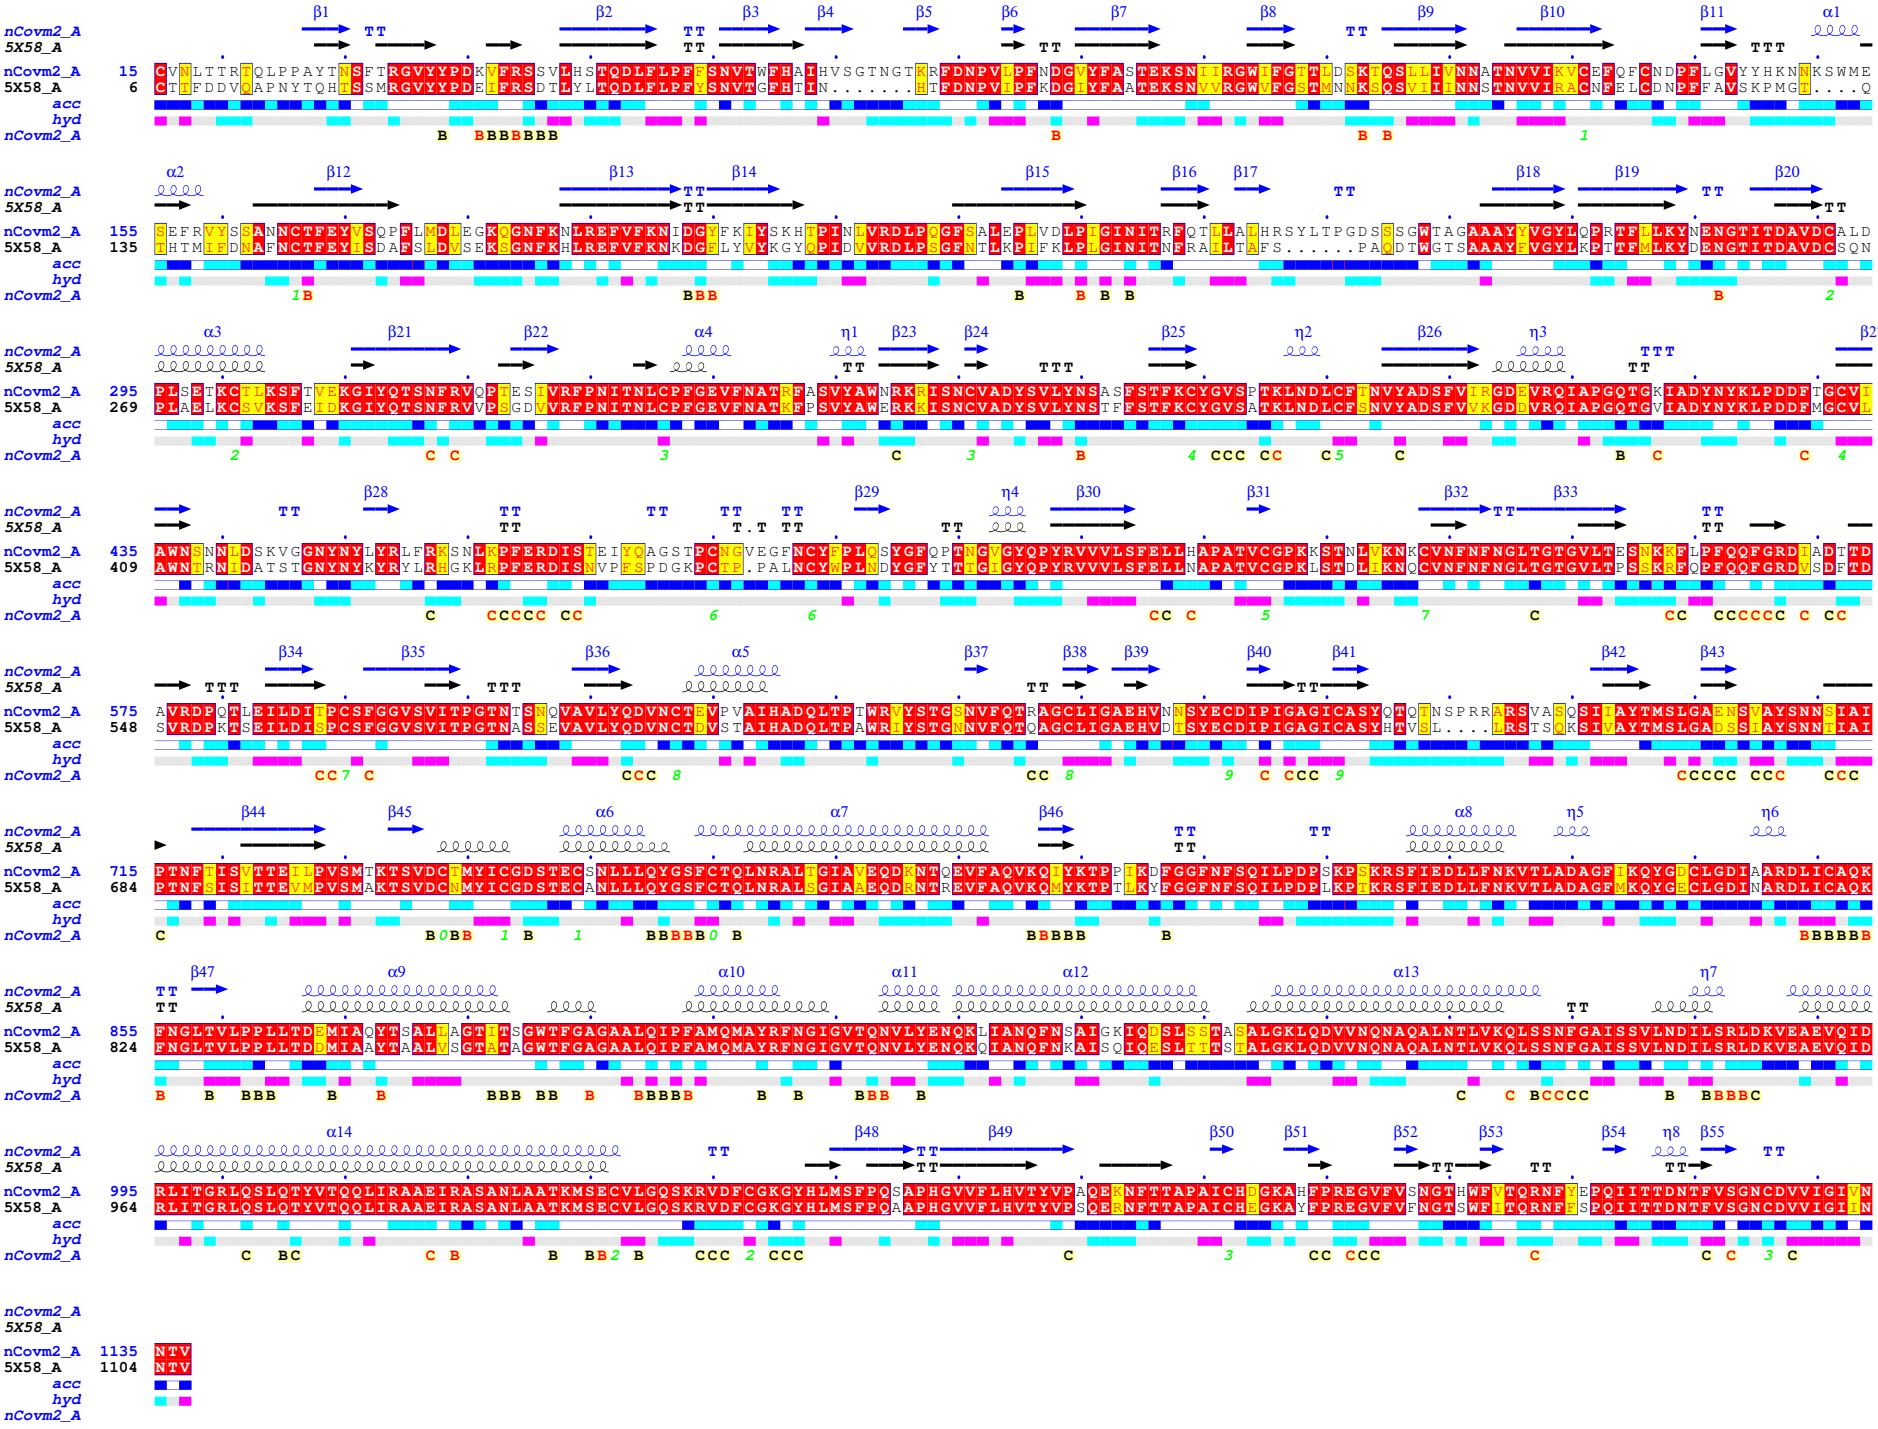

Supplement: Supplementary file 9 [file supplementary]

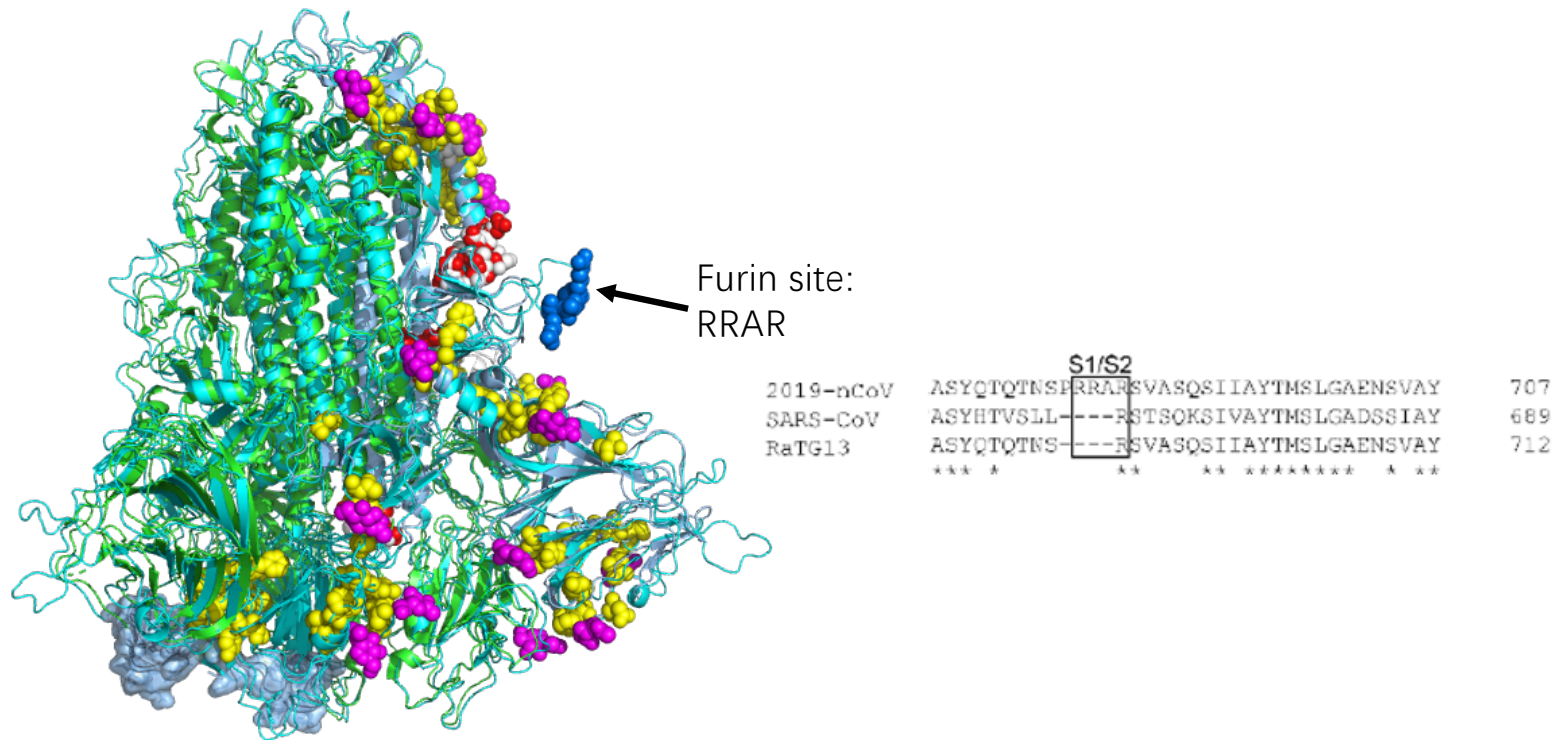

Supplement: Supplementary file 10 [file supplementary]
